# Supplementary material for: Assessment of staffing needs for physicians and nurses at Upazila health complexes in Bangladesh using WHO workload indicators of staffing need (WISN) method
Source: PubMed Central journal article supplement (PMC7045064; doi:10.1136/bmjopen-2019-035183), 2020-02-13
Supplement: bmjopen-2019-035183.draft_revisions.pdf [file bmjopen-2019-035183.draft_revisions.pdf]

# BMJ Open

BMJ Open is committed to open peer review. As part of this commitment we make the peer review history of every article we publish publicly available.

When an article is published we post the peer reviewers' comments and the authors' responses online. We also post the versions of the paper that were used during peer review. These are the versions that the peer review comments apply to.

The versions of the paper that follow are the versions that were submitted during the peer review process. They are not the versions of record or the final published versions. They should not be cited or distributed as the published version of this manuscript.

BMJ Open is an open access journal and the full, final, typeset and author-corrected version of record of the manuscript is available on our site with no access controls, subscription charges or pay-per-view fees (<http://bmjopen.bmj.com>).

If you have any questions on BMJ Open's open peer review process please email [info.bmjopen@bmj.com](mailto:info.bmjopen@bmj.com)

# BMJ Open

## An assessment of staffing needs for physicians and nurses at Upazila Health Complexes in Bangladesh using WHO workload indicators of staffing need (WISN) method

|                               |                                                                                                                                                                                                                                                                                                                                                                                                                                                                                                           |
|-------------------------------|-----------------------------------------------------------------------------------------------------------------------------------------------------------------------------------------------------------------------------------------------------------------------------------------------------------------------------------------------------------------------------------------------------------------------------------------------------------------------------------------------------------|
| Journal:                      | <i>BMJ Open</i>                                                                                                                                                                                                                                                                                                                                                                                                                                                                                           |
| Manuscript ID                 | bmjopen-2019-035183                                                                                                                                                                                                                                                                                                                                                                                                                                                                                       |
| Article Type:                 | Original research                                                                                                                                                                                                                                                                                                                                                                                                                                                                                         |
| Date Submitted by the Author: | 21-Oct-2019                                                                                                                                                                                                                                                                                                                                                                                                                                                                                               |
| Complete List of Authors:     | Joarder, Taufique; BRAC University, BRAC James P Grant School of Public Health; FHI 360, Bangladesh Office<br>Tune, Samiun; BRAC James P Grant School of Public Health, BRAC University, Public Health;<br>Nuruzzaman, Mahmoud; World Health Organization, Country Office, Dhaka, Bangladesh<br>Alam, Sabina; Government of Bangladesh Ministry of Health and Family Welfare, Health Services Division<br>Cruz, Valeria; World Health Organization, Country Office for Bangladesh<br>Zapata, Tomas; SEARO |
| Keywords:                     | Human resource management < HEALTH SERVICES ADMINISTRATION & MANAGEMENT, Health policy < HEALTH SERVICES ADMINISTRATION & MANAGEMENT, PUBLIC HEALTH, HEALTH SERVICES ADMINISTRATION & MANAGEMENT                                                                                                                                                                                                                                                                                                          |
|                               |                                                                                                                                                                                                                                                                                                                                                                                                                                                                                                           |

SCHOLARONE™  
Manuscripts

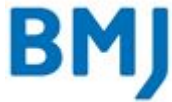

I, the Submitting Author has the right to grant and does grant on behalf of all authors of the Work (as defined in the below author licence), an exclusive licence and/or a non-exclusive licence for contributions from authors who are: i) UK Crown employees; ii) where BMJ has agreed a CC-BY licence shall apply, and/or iii) in accordance with the terms applicable for US Federal Government officers or employees acting as part of their official duties; on a worldwide, perpetual, irrevocable, royalty-free basis to BMJ Publishing Group Ltd ("BMJ") its licensees and where the relevant Journal is co-owned by BMJ to the co-owners of the Journal, to publish the Work in this journal and any other BMJ products and to exploit all rights, as set out in our [licence](#).

The Submitting Author accepts and understands that any supply made under these terms is made by BMJ to the Submitting Author unless you are acting as an employee on behalf of your employer or a postgraduate student of an affiliated institution which is paying any applicable article publishing charge ("APC") for Open Access articles. Where the Submitting Author wishes to make the Work available on an Open Access basis (and intends to pay the relevant APC), the terms of reuse of such Open Access shall be governed by a Creative Commons licence – details of these licences and which [Creative Commons](#) licence will apply to this Work are set out in our licence referred to above.

Other than as permitted in any relevant BMJ Author's Self Archiving Policies, I confirm this Work has not been accepted for publication elsewhere, is not being considered for publication elsewhere and does not duplicate material already published. I confirm all authors consent to publication of this Work and authorise the granting of this licence.

1  
2  
3  
4  
5  
6  
7  
8  
9  
10  
11  
12  
13  
14  
15  
16  
17  
18  
19  
20  
21  
22  
23  
24  
25  
26  
27  
28  
29  
30  
31  
32  
33  
34  
35  
36  
37  
38  
39  
40  
41  
42  
43  
44  
45  
46  
47  
48  
49  
50  
51  
52  
53  
54  
55  
56  
57  
58  
59  
60

1 **\*\*Title page**

2 **An assessment of staffing needs for physicians and nurses at Upazila Health**  
3 **Complexes in Bangladesh using WHO workload indicators of staffing need**  
4 **(WISN) method**

5 Taufique Joarder<sup>1,2</sup>, Samiun Nazrin Bente Kamal Tune<sup>1\*</sup>, Md Nuruzzaman<sup>3</sup>, Sabina Alam<sup>4</sup>,  
6 Valeria de Oliveira Cruz<sup>5</sup>, Tomas Zapata<sup>5</sup>

7  
8 <sup>1</sup>BRAC James P Grant School of Public Health, BRAC University, Dhaka

9 <sup>2</sup>FHI360, Dhaka, Bangladesh

10 <sup>3</sup>World Health Organization Country Office for Bangladesh, Dhaka

11 <sup>4</sup>Health Services Division, Ministry of Health and Family Welfare, Government of Bangladesh

12 <sup>5</sup>World Health Organization South-East Asia Regional Office, New Delhi

13  
14 Email addresses:

15 TJ: [taufiquejoarder@gmail.com](mailto:taufiquejoarder@gmail.com)

16 SNBKT: [samiun.tune@gmail.com](mailto:samiun.tune@gmail.com)

17 MN: [nuruzzamanm@who.int](mailto:nuruzzamanm@who.int)

18 SA: [alam6350@gmail.com](mailto:alam6350@gmail.com)

19 VOC: [deoliveiracruzv@who.int](mailto:deoliveiracruzv@who.int)

20 TZ: [zapatat@who.int](mailto:zapatat@who.int)

21  
22 \*Corresponding author

## 23 **Abstract**

24 **Objective** This study aimed to assess the current workload and staffing need of Physicians and  
25 Nurses for delivering optimum health care services at the Upazila Health Complexes (UpHCs) in  
26 Bangladesh.

27 **Design** Mixed-methods, combining qualitative (e.g., document reviews, key informant interviews,  
28 in-depth interviews, observations) and quantitative methods (time-motion survey)

29 **Setting** Study was conducted in 24 health facilities of Bangladesh. However, UpHCs being the  
30 nucleus of primary health care in Bangladesh, this manuscript limits itself to reporting the findings  
31 from the providers at four UpHCs under this project.

32 **Participants** 18 Physicians and 51 Nurses, males and females.

33 **Primary outcome measures** Workload components were defined based on inputs from five  
34 experts, refined by nine service providers. Using WHO WISN software, standard workload,  
35 category allowance factor, individual allowance factor, total required number of staff, WISN  
36 Difference, and WISN Ratio were calculated.

37 **Results:** Physicians have Very High (WISN Ratio 0.43) and Nurse High (WISN Ratio 0.69)  
38 workload pressure. 50% of Nurses' time are occupied with support activities, instead of nursing  
39 care. There are different workloads among the same staff category in different health facilities. If  
40 only the vacant posts are filled, the workload is reduced. In fact, sanctioned number of Physicians  
41 and Nurses is more than actual need.

42 **Conclusions:** It is evident that high workload pressures prevail for Physicians and Nurses at the  
43 UpHCs. This reveals high demand for these health workforces in the respective sub-districts.  
44 WISN method can aid the policy-makers in optimizing utilization of existing human resources.  
45 Therefore, the government should adopt flexible health workforce planning and recruitment policy

1  
2  
3 46 to manage the patient load and disease burden. WISN should thus be incorporated as a planning  
4  
5 47 tool for health managers. There should be a regular review of health workforce management  
6  
7  
8 48 decisions, and these should be amended based on periodic reviews.  
9  
10  
11 49

## 12 13 50 **Strengths and limitations**

- 15 51 • Time-motion study helped the research team gain a better understanding of the service  
16  
17 52 context of the staffs. When the key informants or experts suggested an unrealistic activity  
18  
19  
20 53 standard, we presented them the time-motion findings and helped them suggest more  
21  
22 54 context sensitive standards.
- 25 55 • Using both qualitative and quantitative methods for primary data collection complemented  
26  
27 56 each other for bringing data accuracy.
- 29 57 • Technical inputs from the WHO technical experts in WISN application in other countries,  
30  
31 58 and officials of the Ministry of Health improved the data quality as they were directly  
32  
33  
34 59 involved in quality checks at the field level.
- 36 60 • One limitation was that some service statistics data, essential for establishing standard  
37  
38  
39 61 workloads, were unavailable.
- 41 62 • Due to lack of scope in WISN methodology, patient engagement was minimal.

## 43 44 63 **Keywords**

46 64 Human Resources for Health, Workforce Management, Workload Indicators of Staffing Need,  
47  
48  
49 65 Bangladesh, Upazila Health Complex, Health Systems  
50  
51  
52 66

## 67 **Background**

68 Shortage of Human Resources for Health (HRH) has been one of the major challenges faced by the  
69 health system and globally, more than 90 countries are haunted by this crisis. According to  
70 International Labor Organization (ILO), there are on average 34.5 health workers per 10,000  
71 population and about one third of the world's population lack access to health care because of  
72 shortage of health workforce<sup>1</sup>. According to the Global strategy on human resources for health:  
73 workforce 2030, the estimated global shortage of skilled health workers will be around 18 million  
74 by 2030<sup>2</sup>. This problem has reached a critical stage in three (Bangladesh, Myanmar and Bhutan)  
75 South-East Asia Region countries with <23 health workers (doctors, nurses and midwives)  
76 per 10,000 population, limiting access to health services<sup>3</sup>.

77  
78 Improving health workers' performance and productivity is vital for better health service provision  
79 in the country. Poor performance of the health workers has been reported in the literature resulting  
80 from too few staff, or staff not providing care according to standards<sup>4,5,6</sup>. The extent of the shortage  
81 is reflected in health worker density rates and workforce vacancy rates, and its impact in health  
82 system performance indicators. Factors that contribute to poor performance of health workers  
83 include limited employment opportunities and low salaries; poor working conditions, weak  
84 support and supervision, and limited opportunities for professional development<sup>7</sup>.

85  
86 Bangladesh's health workforce scenario is characterized by "shortage, inappropriate skill mix and  
87 inequitable distribution"<sup>8,9</sup>. Equitable access to skilled and motivated health worker in a functional  
88 health system is essential for achieving Universal Health Coverage (UHC) and the Sustainable  
89 Development Goals<sup>10</sup>. In 2015, Government of Bangladesh (GoB) approved the Bangladesh

1  
2  
3 90 Health Workforce Strategy which affirms government's vision of equitable availability of skilled,  
4  
5 91 motivated and responsive health workforce in adequate numbers across the country<sup>11</sup>. However,  
6  
7 92 there is lack of comprehensive, nationally representative data on HRH workload and optimum staff  
8  
9 93 need in health care facilities in Bangladesh. A small scale qualitative study found overwhelming  
10  
11 94 workload as one of the critical components that hinders retention of doctors and nurses at rural  
12  
13 95 healthcare facilities in Bangladesh<sup>12</sup>. Another policy analysis on retention of HRH (physicians and  
14  
15 96 nurses) also found that deficiency of adequate workforce and consequent high workload acted as  
16  
17 97 a deterrent against rural retention<sup>13</sup>.

18  
19  
20  
21 98  
22  
23  
24 99 Workload management is very important for any country or institution to deliver quality services,  
25  
26 100 retain staffs and reduce turnover<sup>14</sup>. Even the seminal document on HRH, "Global strategy on  
27  
28 101 human resources for health: Workforce 2030", emphasized on developing country level workforce  
29  
30 102 strategies, drawing on workload analysis studies<sup>15</sup>. Such studies can provide detailed insight into  
31  
32 103 the current state of workload in a system, coping strategies of the staff for regular extra work  
33  
34 104 pressure, causes behind the excessive workloads, and ways to deal with it. This study aimed to fill-  
35  
36 105 in this knowledge gap with respect to workload and optimum staff need for physicians and nurses  
37  
38 106 at the Upazila or Sub-district level (i.e., at Upazila Health Complex [UpHC]). It is expected that  
39  
40 107 this workload analysis will contribute in improving performance, ensuring quality of services, and  
41  
42 108 facilitating uninterrupted service delivery through efficient management of staff.  
43  
44  
45  
46

47 109

## 50 110 **Workload Indicator of Staffing Need (WISN) overview**

51  
52  
53 111 WHO developed the Workload Indicator of Staffing Need (WISN) method in 1998, which was  
54  
55 112 later updated based on learning from implementation in different countries. This method is simple,  
56  
57



1  
2  
3 113 useful and time-saving, which was borrowed from the industrial sector for use in the health sector  
4  
5 114 by Peter Shipp in 1984. The result is expressed in terms of differences and ratios, the former  
6  
7 115 indicating worker shortage or surplus, and the latter workload pressure experienced by the staff<sup>16</sup>.  
8  
9 116  
10  
11  
12 117 WISN results help in human resource decision-making in several ways (Figure 1). For example,  
13  
14 118 recruitment and transfer of HRH can be based on geographic comparison of WISN ratios, staffing  
15  
16 119 of health facilities can be informed by WISN-based workload projection, etc.

## 19 120 **Methods**

### 23 121 **Study design**

25 122 We followed the updated WISN manual<sup>16</sup>, but contextualized it for Bangladeshi setting. The WISN  
26  
27 123 steps have been summarized in Figure 2. The research project was developed based on close  
28  
29 124 collaboration among and mutual insights from three types of committees:

- 32 125 1. **Steering Committee (SC):** The SC was consisting 13 members, established by the Ministry  
33  
34 126 of Health and Family Welfare (MOHFW) with membership from senior government officials  
35  
36 127 (seven): WHO official (one); professional organization of the physicians, Bangladesh Medical  
37  
38 128 Association (one); and relevant academia (four) such as BRAC University (two persons),  
39  
40 129 Bangladesh University of Health Sciences, and Center for Medical Education. All seven senior  
41  
42 130 government officials were directly involved in decision making regarding daily management  
43  
44 131 of the health workforce in their respective departments. WHO officer was there to respond to  
45  
46 132 WISN related technical issues and application. All four academicians were part of the  
47  
48 133 committee because they had expertise in their respective areas (i.e. education, policy making,  
49  
50 134 curriculum development and performance assessment) of the health workforce. They were also  
51  
52  
53  
54  
55  
56  
57  
58  
59  
60

1  
2  
3 135 well known in the community of scientific writing and academic teaching. The role of the SC  
4  
5 136 was to guide and endorse the overall study based on the WISN strategy and its implementation.  
6  
7

8 137 2. **Technical Taskforce (TT):** TT was responsible for guiding the implementation of the WISN  
9  
10 138 process. Researchers from implementing research institution (the school of public health of a  
11  
12 139 Bangladeshi university, BRAC University); and experts from WHO Bangladesh Country  
13  
14 140 Office; an international non-governmental organization (NGO), Save the Children; and  
15  
16 141 another university, Bangladesh University of Health Sciences served in the Taskforce.  
17  
18

19 142 3. **Expert Working Groups (EWG):** There were multiple EWGs, one for each of the following  
20  
21 143 professional groups: General Physicians (Medical Officer [MO], Emergency Medical Officer  
22  
23 144 [EMO], Residential Medical Officer [RMO]), and Nursing Staff (Senior Staff Nurse, Nursing  
24  
25 145 Supervisor). The respective EWG defined the workload components and set activity standard  
26  
27 146 for the specific staff category.  
28  
29

30  
31 147 The qualitative part of this research involved document reviews, key informant interviews (KII)  
32  
33 148 with policy level persons related to HRH issues in Bangladesh (mostly from among SC and EWG  
34  
35 149 members), in-depth interviews (IDI) with individual service providers (e.g., physicians, nurses,  
36  
37 150 etc. working in UpHCs under this study), and observations. The quantitative component involved  
38  
39 151 time-motion survey which is a work measurement technique for recording the times and rates of  
40  
41 152 working for the elements of a specific job though observing a subject continuously or in a certain  
42  
43 153 period of time<sup>17</sup>. Time motion data served as a guide to determine the activity standard for WISN  
44  
45 154 analyses.  
46  
47  
48  
49

50 155  
51  
52  
53  
54  
55  
56  
57  
58  
59  
60

## 156 **Study duration, setting and population**

157 The research continued from July to November 2017 and was carried out in two pre-selected  
158 Districts of Bangladesh (Figure 3):

- 159 • Jhenaidah, located in south-western part of Bangladesh, under Khulna Division
- 160 • Moulvibazar, located in north-eastern part of Bangladesh, under Sylhet Division

161  
162 The selection of the districts was made by the Human Resources Unit, Ministry of Health and  
163 Family Welfare **in collaboration with the development partners (Save the Children and WHO**  
164 **Bangladesh) in a workshop nationally organized in November 2016. Later the selection of**  
165 **the UpHCs was made in consultation with the SC, taking into consideration some**  
166 **performance indicators such as** number of beds, number of total deliveries, number of live births,  
167 bed occupancy rates as well as patient load including the number of outpatient visits. **From each**  
168 **district, two highest performing UpHCs were included in the study**<sup>18</sup>. Thus, Shailkupa and  
169 Kotchandpur UpHCs were selected from Jhenaidah District and Kulaura and Sreemangal from the  
170 Moulvibazar. Because future applications need to be based on optimum quality standards, the  
171 highest performing UpHCs were selected to serve as a model for other health facilities. From each  
172 of these four UpHCs, physicians (Medical Officers and Residential Medical Officers) and nurses  
173 (Senior Staff Nurse and Nursing Supervisor) were included for workload analysis. A total of 24  
174 health facilities from the two districts were studied. This included two district hospitals, four  
175 UpHCs, two Maternal and Child Welfare Centers, eight Union Sub Centers, eight Union Health  
176 and Family Welfare Centers, and eight Community Clinics. This manuscript reported findings  
177 from all the four UpHCs under this study, as UpHCs are the nucleus of the primary health care  
178 delivery in Bangladesh, serving the rural population.

1  
2  
3 179  
4  
56 180 **Sampling strategy**  
7  
89 181 **Qualitative part**  
10  
11

12 182 Documents for review were selected based on the suggestions from the experts (members of SC,  
13  
14 183 TT, and EWG), supplemented by reference tracking of government reports and published literature  
15  
16 184 on HRH of Bangladesh. Key Informants were selected on the principles of purposive sampling<sup>19</sup>,  
17  
18 185 supplemented by snowball sampling (i.e., based on the reference or suggestion from the key  
19  
20 186 informants). IDI respondents were selected through purposive sampling, based on the respondent's  
21  
22 187 seniority and designation (e.g., Residential Medical Officer, Nursing Supervisors, etc.). These  
23  
24 188 respondents were practicing individuals and had more than 10 years of experience and played a  
25  
26 189 supervisory role in their respective health facilities.  
27  
28  
29

30 190  
31  
3233 191 **Quantitative part**  
34  
35

36 192 For time-motion study, time sampling was done for each consenting staff available during the data  
37  
38 193 collection period. Field Data Collectors (FDCs) observed each staff twice for 45-minutes duration,  
39  
40 194 once during the first half of their service duration and again during the second half. This was done  
41  
42 195 to minimize the bias in the time data due to the patient load (assuming higher patient load in the  
43  
44 196 first half and lower in the second).  
45  
46  
47

48 197  
49  
50  
51  
52  
53  
54  
55  
56  
57  
58  
59  
60

## 198 **Tool development, pretest, training of data collectors, agreement test**

199 For qualitative data collection, semi-structured guidelines, including that for document reviews,  
200 KIIs, IDIs, and observation, were developed. For the time-motion study, structured observation  
201 tool was designed. The structured observation tools contained three sections:

- 202 1. Background information of observation setting and the person under observation
- 203 2. Time-motion data sheet (containing three columns: type of activity, time spent in minutes,  
204 and remarks)
- 205 3. Example of the activities (health service activities, support activities, and additional  
206 activities)

207  
208 Health service activities, according to WISN manual, are performed by all members of the staff  
209 category and regular service statistics are available for them for example, obstetrical service,  
210 emergency service, outpatient service, etc. Support activities are also performed by all members  
211 of the staff category, but regular service statistics are not available for them for example, record  
212 keeping and reporting, attending meetings, instrument sterilization, etc. Additional activities are  
213 performed by only certain members of the staff category (e.g., the supervisor or a senior member),  
214 and regular service statistics are not available for them for example, duty roster preparation,  
215 preparing staff evaluation reports, supervision of cleanliness, etc.<sup>17</sup>.

216  
217 The examples of health service activities were primarily drawn from the list of the activities  
218 mentioned in the Essential Services Package (ESP)<sup>20</sup> for respective health facility type. Since  
219 service statistics were not available according the ESP activity list, it was adjusted for the local  
220 context with inputs from the respondents (through KII, followed by IDI), in alignment with the

1  
2  
3 221 availability of service statistics. An ‘hourglass’ approach was adopted for defining the workload  
4  
5 222 components based on the ESP (Figure 4). Tools were pre-tested in a UpHC near Dhaka, before  
6  
7 223 applying for actual data collection. Qualitative tools were also pre-tested through mock IDIs and  
8  
9 224 KIIs. The pre-testing exercise was followed by the training of the Field Supervisors (FSs) and  
10  
11 225 Field Data Collectors (FDCs).  
12  
13  
14  
15 226

### 18 227 **Data collection and quality control**

19  
20 228 At first, FSs were sent to respective districts to orient the personnel on the project, seek support,  
21  
22 229 and assess the availability of the service statistics. The FSs spent one week in each district and  
23  
24 230 conducted qualitative observation of the service provision at the UpHCs, to gain a firsthand  
25  
26 231 understanding of the context.  
27  
28  
29

30 232  
31  
32 233 In the second step, we conducted five KIIs to define workload components, in light of the ESP  
33  
34 234 document’s standard of services by facility level<sup>20</sup>. The workload components were further refined  
35  
36 235 based on IDIs with a total of eight physicians and eight nurses.  
37  
38

39 236  
40  
41 237 In the third step, the FDCs, under the supervision of FSs, conducted time-motion study, using a  
42  
43 238 mobile device (SurveyCTO software). During the time FDCs were collecting time-motion data,  
44  
45 239 the FS, in addition to supervising the FDCs, conducted additional IDIs and collected data on  
46  
47 240 available working time; time required for health service, support, and additional activities; and  
48  
49 241 service statistics.  
50  
51  
52

53 242  
54  
55  
56  
57  
58  
59  
60

243 The next step was data validation and set activity standards. Primary data validation was done  
 244 through phone calls made to the services providers, and health facility statisticians. Secondly, these  
 245 were shared with the SC and TT members. Finally, interviews were conducted with the EWG  
 246 members to finalize the activity standards (Table 1).

248 **Table 1 Number of interviewees representing EWG of staff categories**

| EWG representing staff category                | Number |
|------------------------------------------------|--------|
| Physicians: MO, EMO, RMO                       | 2      |
| Nurses: Nursing Supervisor, Senior Staff Nurse | 7      |
| Total                                          | 9      |

250 We presented the time-motion findings to the EWG members and requested them to be as realistic  
 251 as possible in suggesting activity standards. We also requested them to account for the variability  
 252 of patient load due to factors such as seasonality, timing of day, facility catchment population, etc.  
 253 Finally, through multiple meetings, debates and deliberations, the activity standard was finalized,  
 254 taking into account the information from the IDIs and KIIs, and inputs from the EWG members  
 255 (Table 2).

257 **Table 2 Service standard for Physicians and Nurses in UpHCs, Bangladesh, 2017**

| Activities | Service standard |       | Unit |
|------------|------------------|-------|------|
|            | Physician        | Nurse |      |

|                                                                          |                |                |                   |
|--------------------------------------------------------------------------|----------------|----------------|-------------------|
| Obstetrical Service (Caesarean Section) <sup>a</sup>                     | 90             | 90             | min/patient       |
| Obstetrical Service (Normal Delivery)                                    | 60             | 120            | min/patient       |
| Newborn Management                                                       | 15             | 15             | min/inpatient day |
| Emergency Service                                                        | 15             | Not applicable | min/patient       |
| IMCI/ Nutritional Service                                                | 15             | 15             | min/patient       |
| OPD Service (including NCD management)                                   | 10             | Not applicable | min/patient       |
| First ANC                                                                | 20             | 20             | min/patient       |
| Follow-up ANC                                                            | 10             | 10             | min/patient       |
| PNC                                                                      | 15             | 15             | min/patient       |
| Indoor Services (Round, including minor bedside procedures) <sup>b</sup> | 25.65          | 34             | min/inpatient day |
| Bedside patient care                                                     | Not applicable | 17             | min/inpatient day |
| Patient admission and discharge                                          | Not applicable | 20             | min/inpatient day |
| Death certification and associated arrangements                          | 20             | 30             | min/patient       |

258 **Note:** <sup>a</sup>For Nurses: Assist Obstetrical Service (Caesarean Section); <sup>b</sup>For Nurses: Indoor Services  
 259 (Round with Physician)

260 # IMCI: Integrated Management of Childhood Illness; OPD: Out Patient Department; NCD: Non-  
 261 communicable Diseases; ANC: Antenatal Care; PNC: Postnatal Care.



1  
2  
3 262  
4  
5  
6  
7 263 In order to ensure the quality of data, the Principal Expert (lead author of this article), Co-experts  
8  
9 264 (two co-experts – one was leading data collection and the other was leading data quality check and  
10  
11 265 reporting), WHO team consisting of national and international technical experts, and officials from  
12  
13 266 the Human Resource Branch of Ministry of Health and Family Welfare (MoHFW) conducted field  
14  
15 267 visits to each study District and the health facilities therein. During the time-motion data collection  
16  
17 268 period, the Co-experts monitored the data and their geographic location in real-time. They also  
18  
19 269 regularly checked the consistency of the data. Our field based data collection team saved contact  
20  
21 270 information of all the respondents; so, in case of any confusion or need for clarification, the Co-  
22  
23 271 experts called the respondents over phone.  
24  
25  
26  
27  
28  
29  
30

272

### 31 **Data management and analysis**

32  
33  
34 274 The first analytic step was to estimate available working time of the staffs. This is the time a health  
35  
36 275 worker has available in one year to do his or her work, taking into account authorized and  
37  
38 276 unauthorised absences<sup>17</sup>. For all categories of staff, a uniform number of weeks per year (52  
39  
40 277 weeks), working days in one week (six days), possible working days in one year ( $52 * 6 = 312$   
41  
42 278 days) were estimated. Next, absent days, such as public holidays (20 days), earned leave (average  
43  
44 279 for each staff category, based on Health Management Information System data), and casual leave  
45  
46 280 (20 days) were deducted to obtain the annual working time in days. Multiplying this with daily  
47  
48 281 working hours (six hours per day), we obtained annual working time in hours.  
49  
50  
51  
52

282

1  
2  
3 283 Workload components were defined through the inputs from the key informants; activity standards  
4  
5 284 were also set through the interviews with the EWG members. An activity standard is the time  
6  
7  
8 285 necessary for a well-trained, skilled and motivated worker to perform an activity to professional  
9  
10 286 standards in the local circumstances<sup>17</sup>. Both service standards (for health service activities),  
11  
12 287 category allowance standards (for support activities), and individual allowance standards (for  
13  
14  
15 288 additional activities) were determined in the same way.

16  
17 289 The next analytic step was to establish standard workload, which was done by dividing the annual  
18  
19 290 working time by unit time of health service activities. A standard workload is the amount of work  
20  
21 291 within a health services workload component that one health service provider can do in a year  
22  
23 292 hypothetically<sup>17</sup>. Then category allowance factor and individual allowance factors were calculated  
24  
25 293 using the following formula, respectively:

26  
27  
28 294  $\text{Category allowance factor} = 1 / \{1 - (\text{Total category allowance standard} / 100)\}$

29  
30  
31 295  $\text{Individual allowance factor} = \text{Total individual allowance standard} / \text{Available working time in}$   
32  
33 296  $\text{hours}$

34  
35 297

36  
37  
38 298 Next, exact number of required staff was calculated by the following formula:

39  
40 299  $\text{Total required number of staff} = (\text{Staff needed for health service activity} * \text{Category allowance}$   
41  
42 300  $\text{factor}) + \text{Individual allowance factor}$

43  
44  
45 301 The fractional results were rounded up or down, following the guideline provided in the WISN  
46  
47 302 manual<sup>17</sup>:

- 48  
49 303 • 1.0 – 1.1 is rounded down to 1 and >1.1 – 1.9 is rounded up to 2  
50  
51 304 • 2.0 – 2.2 is rounded down to 2 and >2.2 – 2.9 is rounded up to 3  
52  
53  
54 305 • 3.0 – 3.3 is rounded down to 3 and >3.3 – 3.9 is rounded up to 4  
55  
56  
57  
58  
59  
60

- 1  
2  
3 306       • 4.0 – 4.4 is rounded down to 4 and >4.4 – 4.9 is rounded up to 5  
4  
5 307       • 5.0 – 5.5 is rounded down to 5 and >5.5 – 5.9 is rounded up to 6  
6  
7  
8 308  
9

10 309 Finally, based on the existing number of staff in the respective health facilities, we calculated both  
11  
12 310 the difference (current number of staff – required number of staff by WISN), and the ratio (current  
13  
14 311 number of staff / required number of staff by WISN). The WISN difference indicates whether the  
15  
16 312 health facilities are relatively understaffed (i.e., when the WISN difference is negative),  
17  
18 313 overstaffed (i.e., when the WISN difference is positive), or balanced (i.e., when the WISN  
19  
20 314 difference is zero). The WISN Ratio indicates whether the staffs are experiencing high workload  
21  
22 315 (i.e., when the WISN Ratio is lower than one), low workload (i.e., when the WISN Ratio is higher  
23  
24 316 than one), or normal workload (i.e., when the WISN Ratio is equal to one). For this calculation,  
25  
26 317 we used the de-facto number of current staff, i.e., the number of staff that we actually found  
27  
28 318 working in the health facilities during our data collection period; not the number shown in the  
29  
30 319 office records or statistics.  
31  
32  
33  
34  
35  
36  
37  
38

### 39 321 **Ethical considerations**

40  
41 322 Ethical approval for this study was obtained from the Ethical Review Committee (ERC) of BRAC  
42  
43 323 James P Grant School of Public Health, BRAC University. All ethical principles, were strictly  
44  
45 324 adhered to. Appropriate consent process was followed before collecting any research data.  
46  
47  
48  
49  
50

### 51 326 **Results**

52  
53  
54  
55  
56  
57  
58  
59  
60

### 327 **General WISN findings across levels**

328 For descriptive purposes, we have categorized the workload pressure as Extremely High (WISN  
 329 Ratio between 0.10 and 0.29), Very High (WISN Ratio between 0.30 and 0.49), High (WISN Ratio  
 330 between 0.50 and 0.69), Moderately High (WISN Ratio between 0.70 and 0.89), Normal (WISN  
 331 Ratio between 0.90 and 1.19), and Low (WISN Ratio greater than or equal to 1.20). Based on this  
 332 categorization, at an aggregate level (i.e., considering the average required number and WISN  
 333 Ratio across the same types of health facilities), physicians are found to have a Very High (WISN  
 334 Ratio 0.43) and nurses High (WISN Ratio 0.69) workload pressure. To cope with the workload,  
 335 on an average 11 physicians (on average 4.50 were available during data collection) and 19 nurses  
 336 (On average 12.75 were available during data collection) are needed in each UpHC (Table 3). This  
 337 means, there was an average deficit of six members in each staff categories.

338  
 339 **Table 3 Analysis of WISN results at aggregate level (average required number and WISN**  
 340 **Ratio across same types of health facilities)**

| 36 <b>Staff</b>    | 37 <b>Required staff to</b> | 38 <b>Average</b>        | 39 <b>Deficit</b>  | 40 <b>Average</b> | 41 <b>Workload</b> |
|--------------------|-----------------------------|--------------------------|--------------------|-------------------|--------------------|
| 42 <b>category</b> | 43 <b>cope with the</b>     | 44 <b>number of</b>      | 45 <b>of staff</b> | 46 <b>WISN</b>    | 47 <b>pressure</b> |
|                    | 48 <b>demand</b>            | 49 <b>existing staff</b> |                    | 50 <b>Ratio</b>   |                    |
| 51 Physician       | 52 10.59                    | 53 4.50                  | 54 6.09            | 55 0.43           | 56 Very high       |
| 57 Nurse           | 58 18.86                    | 59 12.75                 | 60 6.11            | 0.69              | High               |

341

342 Tabulating the total percentage of time spent on all support activities (i.e., category allowance  
 343 standards) by different staff categories, we found that, 50% of nurses' time are occupied with  
 344 support activities (Table 4).

346 **Table 4 Comparison of Support Activities across staff categories**

| Staff category | Total % of support activities |
|----------------|-------------------------------|
| Physician      | 24%                           |
| Nurse          | 50%                           |

347

### 348 **WISN results disaggregated by UpHCs**

349 The required number of staff ranges from eight to 12 among Physicians, and 16 to 23 among  
 350 Nurses. Highest shortage is observed in Nurses of Sreemangal UpHC (-8.46), followed by  
 351 Physicians of Kulaura UpHC (-8.28). Workload pressure is the highest among Physicians of  
 352 Kotchandpur UpHC (WISN Ratio 0.28) and lowest among Nurses of Shailkupa (WISN Ratio 0.87)  
 353 (Table 5).

354

355 **Table 5 Analysis of WISN results of Upazila level health staff**

| Health facility                  | Current number of staff | Required number, based on WISN | Shortage or excess | WISN Ratio | Workload pressure |
|----------------------------------|-------------------------|--------------------------------|--------------------|------------|-------------------|
| <b>Staff category: Physician</b> |                         |                                |                    |            |                   |

|                              |    |       |       |      |                    |
|------------------------------|----|-------|-------|------|--------------------|
| Shailkupa UpHC               | 4  | 8.14  | -4.14 | 0.49 | Very High          |
| Kotchandpur<br>UpHC          | 3  | 10.71 | -7.71 | 0.28 | Extremely<br>High  |
| Kulaura UpHC                 | 4  | 12.28 | -8.28 | 0.33 | Very High          |
| Sreemangal<br>UpHC           | 7  | 11.23 | -4.23 | 0.62 | High               |
| <b>Staff category: Nurse</b> |    |       |       |      |                    |
| Shailkupa UpHC               | 14 | 16.08 | -2.08 | 0.87 | Moderately<br>High |
| Kotchandpur<br>UpHC          | 15 | 22.80 | -7.8  | 0.66 | High               |
| Kulaura UpHC                 | 10 | 16.08 | -6.08 | 0.62 | High               |
| Sreemangal<br>UpHC           | 12 | 20.46 | -8.46 | 0.59 | High               |

356

### 357 **Change of workload if vacancies are filled**

358 If the vacant posts are filled, understandably, the workload is reduced. In most of the cases,  
 359 sanctioned number of Physicians and Nurses is more than what is actually needed to tackle the  
 360 workload. However, only filling up the vacant posts are not enough in case of some of the staff  
 361 categories, such as the Nurses at Kotchandpur and Physicians at Sreemangal (Table 6).

362

363 **Table 6 Change of workload if vacancies in Physician and Nursing posts are filled**

| Health facility  | Staff category | Current number of staff | Required number, based on WISN | WISN Ratio | Sanctioned number of staff | WISN Ratio as per sanctioned number of staff |
|------------------|----------------|-------------------------|--------------------------------|------------|----------------------------|----------------------------------------------|
| Shailkupa UpHC   | Physician      | 4                       | 8.14                           | 0.49       | 10                         | 1.25                                         |
|                  | Nurse          | 14                      | 16.08                          | 0.87       | 21                         | 1.31                                         |
| Kotchandpur UpHC | Physician      | 3                       | 10.71                          | 0.28       | 20                         | 1.82                                         |
|                  | Nurse          | 15                      | 22.80                          | 0.66       | 20                         | 0.87                                         |
| Kulaura UpHC     | Physician      | 4                       | 12.28                          | 0.33       | 20                         | 1.67                                         |
|                  | Nurse          | 10                      | 16.08                          | 0.62       | 26                         | 1.62                                         |
| Sreemangal UpHC  | Physician      | 7                       | 11.23                          | 0.62       | 10                         | 0.91                                         |
|                  | Nurse          | 12                      | 20.46                          | 0.59       | 22                         | 1.10                                         |

364

365 **Discussion and recommendations**366 **Discussion**

367 Findings from this WISN study clearly indicates that the public-sector healthcare providers in  
 368 Bangladesh are suffering from a very high workload pressure. Nurses are predominantly occupied  
 369 with support activities rather than actual nursing care. There is unequal workload across UpHCs,  
 370 indicating potential for workforce re-distribution. The unequal workload mainly stems from

1  
2  
3 371 differing patient load, due to geographic location, number of catchment population, and  
4  
5 372 epidemiological characteristics, at different UpHCs. Inappropriate number of sanctioned posts  
6  
7  
8 373 indicate the necessity of WISN-based workforce planning.  
9

10 374  
11  
12 375 High workload pressure may arise from absolute or relative shortage of health workforce. Absolute  
13  
14 376 shortage appears when there is inadequate production of a particular staff category while relative  
15  
16 377 shortage appears when health workforce is not distributed evenly between the urban and rural areas  
17  
18 378 throughout the country for various reasons. For example, absolute shortage in HRH production is  
19  
20 379 revealed by the fact that there are only 4.90 registered physicians and 2.90 registered nurses per  
21  
22 380 10,000 populations<sup>18</sup>, rendering the country to be one of the 57 critical workforce shortage  
23  
24 381 countries in the world<sup>6</sup>. On top of this absolute shortage, Bangladesh also suffers from relative  
25  
26 382 shortage, as evidenced from the fact that physician to population ratio in urban areas is 1:1,500,  
27  
28 383 but in rural areas it is 1:15,000<sup>21</sup>. Workload pressure has some serious consequences as well,  
29  
30 384 namely, fatigue and burnout of service providers, lack of motivation, and compromised quality of  
31  
32 385 care<sup>22</sup>. High workload is, however, not unique to Bangladesh. WISN studies in Low- and Middle-  
33  
34 386 Income Countries (LMICs) like Namibia<sup>23</sup>, Uganda<sup>24</sup>, Kenya<sup>25</sup>, Burkina Faso<sup>26</sup>, and Iran<sup>27</sup> also  
35  
36 387 identified high workload pressure among their HRH.  
37  
38  
39  
40  
41  
42 388  
43

44 389 It is expected that the nurses would spend most of their service times beside the patients, providing  
45  
46 390 nursing care. Unfortunately, this is not the case in Bangladesh as well as in some other comparable  
47  
48 391 settings. A qualitative study in Bangladesh showed, nurses' maximum time is spent on  
49  
50 392 administrative and paperwork tasks<sup>28</sup>. Excessive support activities of nurses is reported in studies  
51  
52 393 conducted in Iran<sup>27</sup>, and Uganda<sup>24</sup> as well. A recent WISN study conducted in Iran showed, nurses  
53  
54  
55  
56  
57  
58  
59  
60



1  
2  
3 394 are overburdened; and support activities account for 31% of their workload<sup>27</sup>. Nurses' excessive  
4  
5 395 engagement in paperwork or other support activities may result from deficient human resource  
6  
7  
8 396 planning and management.  
9

10 397  
11  
12 398 Despite the fact that most of the staff are already overworked, staffs in some health facilities may  
13  
14 399 be more so, compared to a neighboring one. Presence of different number of staffs causes  
15  
16 400 fluctuation in the amount of workload at different health facilities. In places where workload of a  
17  
18 401 staff category is 'Extremely High', some supports from nearby health facilities with lower  
19  
20 402 workload should be sought. Or, in places where workload of a staff category is 'Normal' or 'Low',  
21  
22 403 some support may be transferred to health facilities with higher workload. For example, in  
23  
24 404 Sreemangal UpHC, there are seven physicians, with a High workload pressure. However,  
25  
26 405 workload pressure in nearby Kulaura UpHC is Very High, with only four physicians (Table 5). At  
27  
28 406 least one physician from Sreemangal can be reallocated to Kulaura to tackle the high workload.  
29  
30  
31 407 Similar action may be taken regarding the Nurses by transferring some from Shailkupa  
32  
33 408 (Moderately High workload) to Kotchandpur (High workload). This is just an example how WISN  
34  
35 409 can help in decision-making regarding allocation of human resources. Similar situation was  
36  
37 410 identified in Namibia, where researchers suggested redistribution of health workers from one area  
38  
39 411 to the other<sup>23</sup>.  
40  
41  
42  
43  
44  
45 412

46  
47 413 We found that many posts remained vacant in different health facilities. Some staffs were not  
48  
49 414 present at their service locations for various reasons, such as training, deputation to another health  
50  
51 415 facility, etc. Even if the existing posts are filled-up, a large portion of the workload would be  
52  
53 416 curbed. For example, according to the Standard Setup document of the Ministry of Public  
54  
55  
56  
57  
58  
59  
60

1  
2  
3 417 Administration, 18 physician posts (10 Junior Consultants, one Residential Medical Officer, seven  
4  
5 418 Assistant Surgeons) have been proposed for a 50 bed hospital<sup>29</sup>. We have found 4.5 Physicians on  
6  
7 419 an average in each UpHC. The average required number is 11 (Table 3). Our proposition is that,  
8  
9 420 even if it is not possible to reach the ideal workforce setup for a health facility, filling-up at least  
10  
11 421 the vacant positions, and ensuring regular presence of all staffs would reduce the workload.  
12  
13 422 Supportive supervision and monitoring of the staff is essential to ensure the presence of posted  
14  
15 423 staff. Researchers in Namibia came up with the similar finding and proposed a similar solution for  
16  
17 424 the problem<sup>23</sup>. WISN was used over standard staffing schedule in HIV Clinics in Kenya as well to  
18  
19 425 resolve a similar crisis<sup>25</sup>.  
20  
21  
22  
23  
24 426

## 27 427 **Recommendations**

28  
29 428 Based on the findings and its in-depth analysis, we propose few short-term and long-term  
30  
31 429 recommendations. The short-term recommendations require administrative or management  
32  
33 430 decisions, relatively easier to implement and tackle the immediate crisis. On the other hand, the  
34  
35 431 long-term recommendations demand radical policy amendments following careful examination.  
36  
37  
38  
39 432

40  
41 433 Short-term recommendations include: reallocation of staff from low workload areas to high  
42  
43 434 workload areas, fill-up existing vacant positions and strengthen supervision and monitoring.  
44  
45 435 Nurses are the most needed staff, the most overloaded, and are short in supply. On top of all these,  
46  
47 436 they are burdened with support activities. If some of their support and additional activities can be  
48  
49 437 shifted to other staff, nurses can devote their time better in nursing care.  
50  
51  
52  
53 438

1  
2  
3 439 The study yields some long-term recommendations as well, for the policy-makers. For example,  
4  
5 440 in order to increase the availability of workforce, especially Nurses, and decrease their workload,  
6  
7 441 their number needs to increase. Hence, long term policy response is needed to increase the intake  
8  
9 442 of nursing students, train them with quality education, and deploy them in larger numbers in a  
10  
11 443 secure and gender-friendly work environment. In the same vein, incentives should be given to  
12  
13 444 increase the number of nurses in both public and private sector educational institutions.  
14  
15 445 Regulations should be developed and implemented so that medical colleges can be established  
16  
17 446 only when a nursing school is established alongside. Otherwise, the skill-mix imbalance between  
18  
19 447 physicians and nurses would jeopardize the quality of care. Quality and quantity of physicians  
20  
21 448 should also increase.

22  
23  
24  
25  
26 449 Secondly, since the Nurses are found to be predominantly engaged in support activities at the  
27  
28 450 expense of actual patient care, a separate staff category for administrative/ support activities is  
29  
30 451 greatly warranted. This will free up the valuable yet scarce clinical time of the service providers.

31  
32  
33 452 Thirdly, instead of the existing approach of deploying a fixed number of workforce at all health  
34  
35 453 facilities, a flexible recruitment and HRH planning is needed, based on patient load and disease  
36  
37 454 burden. This can be supported by determination of absolute requirement of HRH in those health  
38  
39 455 facilities by using the WHO methodology on workload indicators of staffing need. It is important  
40  
41 456 to recognize that, decisions in health sector are very much contingent on the local context,  
42  
43 457 especially the patient load, demographic drivers (e.g., age structure of the population, gender ratio,  
44  
45 458 etc.), and epidemiologic profile. Therefore, the government should adopt flexible health workforce  
46  
47 459 planning and recruitment policy in place to keep up with the local patient load and disease burden.  
48  
49 460 The culture of bottom-up decision-making should be adopted eventually.  
50  
51  
52  
53  
54 461

## 462 **Strengths and limitations**

463 This study had a number of strengths. First, we conducted time-motion study, which helped the  
464 research team gain a better understanding of the service context of the staffs. Secondly, when the  
465 key informants or experts suggested an unrealistic activity standard, we presented them the time-  
466 motion findings and helped them suggest a more context sensitive standards. Thirdly, the research  
467 team used both qualitative and quantitative methods for primary data collection, which  
468 complement each other for bringing data accuracy. Fourthly, WHO technical officers, who had  
469 expertise in WISN application in other countries, and the Ministry of Health officials were directly  
470 involved in the field level data quality checks.

471  
472 However, despite careful planning and painstaking implementation of the research, we faced some  
473 challenges during different stages of the WISN process. First, some service statistics data, which  
474 were essential for establishing standard workloads, were not readily available due to poor record  
475 keeping systems at some health facilities. Secondly, the research did not take into account the  
476 patients' opinion or stakeholders' stance. Notwithstanding the fact that these perspectives are  
477 gaining momentum in health workforce decision-making, we could not take advantage of them in  
478 the interest of adhering to the highly structured nature of the WISN methodology. Thirdly, the  
479 official number of existing staffs often did not match with the number of staffs we observed  
480 providing services.

## 482 **Conclusions**

483 Human resource management is a big challenge, especially in a resource-poor setting like  
484 Bangladesh. With a vision of becoming a middle-income country by 2021, Bangladesh needs to

1  
2  
3 485 strive for optimizing its existing resources, including human resources. This type of study can aid  
4  
5 486 the decision-making in this direction, using the WISN as a planning tool for the managers.  
6  
7 487 Implementation research is needed regarding how this workload-based staffing decisions can be  
8  
9 488 integrated into the health systems in the most effective way. We expect that, these types of studies  
10  
11 489 would pave the way for evidence-based HRH decision-making in the context of health system of  
12  
13 490 Bangladesh.  
14  
15  
16  
17  
18  
19

## 20 492 **List of abbreviations**

21  
22 493 ANC: Antenatal Care;  
23  
24 494 EMO: Emergency Medical Officer;  
25  
26 495 ERC: Ethical Review Committee;  
27  
28 496 ESP: Essential Services Package;  
29  
30 497 EWG: Expert Working Groups;  
31  
32 498 FDCs: Field Data Collectors;  
33  
34 499 FSs: Field Supervisors;  
35  
36 500 GoB: Government of Bangladesh;  
37  
38 501 HRH: Human Resources for Health;  
39  
40 502 IDI: In-depth Interviews;  
41  
42 503 IMCI: Integrated Management of Childhood Illness;  
43  
44 504 KII: Key Informant Interviews;  
45  
46 505 LMICs: Low- and Middle-Income Countries;  
47  
48 506 MO: Medical Officer;  
49  
50 507 MoHFW: Ministry of Health and Family Welfare;  
51  
52  
53  
54  
55  
56  
57  
58  
59  
60

1  
2  
3 508 NCD: Non-communicable Diseases;  
4  
5 509 OPD: Out Patient Department;  
6  
7  
8 510 PNC: Postnatal Care;  
9  
10 511 RMO: Residential Medical Officer;  
11  
12 512 SC: Steering Committee;  
13  
14 513 TT: Technical Taskforce;  
15  
16 514 UHC: Universal Health Coverage;  
17  
18 515 UpHCs: Upazila Health Complexes;  
19  
20  
21 516 WISN: Workload Indicators of Staffing Need  
22  
23  
24  
25  
26  
27

## 518 **Declarations**

### 519 *Consent for publication*

520 During the data collection process, while the ethical consents were obtained from the respondents,  
521 they were informed that their data might be used for publication in future. They were also informed  
522 that their identity will remain anonymous. Institutional consents for publication were obtained as  
523 well.

### 524 *Availability of data and materials*

525 As our study is not involved in developing new software, or new database, therefore, the datasets  
526 generated and analyzed during this study (which was developed using WISN software) are not  
527 publicly available. But if necessary, we will share our database for future research purposes.

528

### 529 *Competing interests*

530 The authors declared that they do not have any competing interests.

531

### 532 *Funding*

533 This study was funded by WHO Country Office, Bangladesh and conducted by a group of  
534 researchers at BRAC James P Grant School of Public Health, BRAC University.

535

### 536 *Authors' contributions*

537 TJ conceived and designed the study. TJ and SNBKT carried out the data analyses and drafted the  
538 manuscript. MN, SA, VOC, and TZ thoroughly reviewed the manuscript and contributed  
539 substantially with necessary revision. TJ and SNBKT again reviewed the manuscript and prepared  
540 for final submission. All authors approved the final manuscript.

541

### 542 *Acknowledgements*

543 BRAC James P Grant School of Public Health, BRAC University acknowledges with gratitude to  
544 WHO Country Office, Bangladesh for its contribution in this research effort and MoHFW for  
545 supporting the research team throughout the study period. We are also thankful to the study  
546 participants who consented to participate in the study. We are indebted to Professor. Dr. Sayed  
547 Masud Ahmed, who served as the Advisor to the study project, and provided valuable technical  
548 inputs at different stages of the project. Finally, we would like to extend our sincere gratitude to  
549 the Field Supervisors and Data Collectors for their contribution throughout the qualitative and  
550 quantitative data collection.

1  
2  
3 551  
4  
5  
6 552 **Patient and Public Involvement statement:** No patient involved  
7

8 553  
9

## 10 554 **References**

- 11  
12  
13 5551. International Labor Organization. Global Extension of Social Security. Geneva; 2013.  
14  
15 5562. World Health Organization. Global strategy on human resources for health: workforce 2030.  
16  
17 Geneva; 2016.  
18  
19 5583. WHO South East Asia Regional Office. Decade for health workforce strengthening in the South-  
20  
21 East Asia Region 2015-2024, second review of progress; New Delhi; 2018  
22  
23 559 [http://apps.searo.who.int/PDS\\_DOCS/B5439.pdf](http://apps.searo.who.int/PDS_DOCS/B5439.pdf)  
24  
25 560  
26  
27 5614. Lerberghe WV, Conceic CC, Damme WV, and Ferrinho P. When staff is underpaid : dealing with  
28  
29 562 the individual coping strategies of health personnel. 2002; 80 (01): p. 581–584.  
30  
31 <https://www.ncbi.nlm.nih.gov/pmc/articles/PMC2567566/pdf/12163923.pdf>.  
32  
33 5645. Rowe AK, De Savigny D, Lanata CF, Victora CG. How can we achieve and maintain high-quality  
34  
35 565 performance of health workers in low-resource settings?. *The Lancet*. 2005 Sep 17;366:  
36  
37 566 9490.p.1026-35. [https://www.thelancet.com/journals/lancet/article/PIIS0140-6736\(05\)67028-](https://www.thelancet.com/journals/lancet/article/PIIS0140-6736(05)67028-6/fulltext?code=lancet-site)  
38  
39 567 [6/fulltext?code=lancet-site](https://www.thelancet.com/journals/lancet/article/PIIS0140-6736(05)67028-6/fulltext?code=lancet-site).  
40  
41  
42 5686. World Health Organization. The world health report: working together for health. Geneva: World  
43  
44 569 Health Organization; 2006.  
45  
46 5707. Henderson LN, Tulloch J. Incentives for retaining and motivating health workers in Pacific and  
47  
48 571 Asian countries. *Human resources for health*. 2008 Dec;6(1):18. doi: 10.1186/1478-4491-6-18.  
49  
50 5728. BanglaPedia. National Encyclopedia of Bangladesh. Available at  
51  
52 <http://en.banglapedia.org/index.php?title=Season> (Accessed on 21 August 2019)  
53  
54  
55  
56  
57  
58  
59  
60



- 1  
2  
3 5749. Ahmed SM, Evans TG, Standing H, Mahmud S. Harnessing pluralism for better health in  
4  
5 575 Bangladesh. *The Lancet*. 2013 Nov 23;382(9906):1746-55.doi: 10.1016/S0140-6736(13)62147-9.  
6  
7  
8 57610. Ahmed SM, Alam BB, Anwar A, Begum T, Haque R, AM Khan J and et al. Bangladesh Health  
9  
10 577 System Review. Edited by A. Naheed and K. Hort. Dhaka: World Health Organization; 2015  
11  
12 57811. Cometto G, Witter S. Tackling health workforce challenges to universal health coverage: setting  
13  
14 579 targets and measuring progress. *Bulletin of the World Health Organization*. 2013;91:881-5. doi:  
15  
16 580 10.2471/BLT.13.118810.  
17  
18  
19 58112. Government of Bangladesh (2015) Bangladesh Health Workforce Strategy 2015. Dhaka.  
20  
21 58213. Darkwa EK, Newman MS, Kawkab M, Chowdhury ME. A qualitative study of factors influencing  
22  
23 583 retention of doctors and nurses at rural healthcare facilities in Bangladesh. *BMC health services*  
24  
25 584 *research*. 2015 Dec;15(1):344. doi: 10.1186/s12913-015-1012-z.  
26  
27  
28 58514. Rawal LB, Joarder T, Islam SM, Uddin A, Ahmed SM. Developing effective policy strategies to  
29  
30 586 retain health workers in rural Bangladesh: a policy analysis. *Human resources for health*. 2015  
31  
32 587 Dec;13(1):36. Available at: [http://www.coe-uhc.org/index.php/publications/category/9-working-](http://www.coe-uhc.org/index.php/publications/category/9-working-paper-series)  
33  
34 588 [paper-series](http://www.coe-uhc.org/index.php/publications/category/9-working-paper-series).  
35  
36  
37 58915. deVaron Reynolds J, Costello T, Edwards MT. The study of workload in child protective and child  
38  
39 590 welfare services. *Time and Effort: Perspectives on Workload Roundtable*. 2008 Dec 3. Available  
40  
41 591 at:  
42  
43 592 [https://www.researchgate.net/profile/Robin\\_Perry3/publication/237430886\\_A\\_Critical\\_Appraisa](https://www.researchgate.net/profile/Robin_Perry3/publication/237430886_A_Critical_Appraisal_of_What_Child_Welfare_Workers_Do_Findings_From_a_Task_Analysis_Study_in_Florida/links/54662f200cf25b85d17f5b5b.pdf#page=4)  
44  
45 593 [l\\_of\\_What\\_Child\\_Welfare\\_Workers\\_Do\\_Findings\\_From\\_a\\_Task\\_Analysis\\_Study\\_in\\_Florida/li](https://www.researchgate.net/profile/Robin_Perry3/publication/237430886_A_Critical_Appraisal_of_What_Child_Welfare_Workers_Do_Findings_From_a_Task_Analysis_Study_in_Florida/links/54662f200cf25b85d17f5b5b.pdf#page=4)  
46  
47 594 [nks/54662f200cf25b85d17f5b5b.pdf#page=4](https://www.researchgate.net/profile/Robin_Perry3/publication/237430886_A_Critical_Appraisal_of_What_Child_Welfare_Workers_Do_Findings_From_a_Task_Analysis_Study_in_Florida/links/54662f200cf25b85d17f5b5b.pdf#page=4).  
48  
49  
50 59516. World Health Organization. Global strategy on human resources for health: workforce 2030. 2016.  
51  
52 596 Available at: <http://apps.who.int/iris/bitstream/10665/250368/1/9789241511131-eng.pdf?ua=1>.  
53  
54  
55  
56  
57  
58  
59  
60

- 1  
2  
3 59717. World Health Organization (2010) Workload Indicators of Staffing Need: User's Manual. Geneva:  
4  
5 598 World Health Organization.  
6  
7 599 World Health Organization. Workload indicators of staffing need: User's manual. Geneva: World  
8  
9 Health Organization. 2010.  
10  
11  
12 60118. Lopetegui M, Yen PY, Lai A, Jeffries J, Embi P, Payne P. Time motion studies in healthcare: what  
13  
14 602 are we talking about?. *Journal of biomedical informatics*. 2014 Jun 1;49:292-9. doi:  
15  
16 603 10.1016/j.jbi.2014.02.017.  
17  
18  
19 60419. Government of Bangladesh. *Health Bulletin*. Dhaka. 2016a.  
20  
21 60520. Ritchie J, Lewis J, Nicholls CM, Ormston R, editors. Qualitative research practice: A guide for  
22  
23 606 social science students and researchers. sage; 2013 Nov 1.  
24  
25  
26 60721. Government of Bangladesh. Bangladesh Essential Health Service Package (ESP). Dhaka. 2016b.  
27  
28 60822. Ahmed SM, Hossain MA, RajaChowdhury AM, Bhuiya AU. The health workforce crisis in  
29  
30 609 Bangladesh: shortage, inappropriate skill-mix and inequitable distribution. *Human resources for*  
31  
32 610 *health*. 2011 Dec;9(1):3. Available at: <http://www.human-resources-health.com/content/9/1/3>.  
33  
34  
35 61123. Greenglass ER, Burke RJ, Moore KA. Reactions to increased workload: Effects on professional  
36  
37 612 efficacy of nurses. *Applied psychology*. 2003 Oct;52(4):580-97. doi: 10.1111/1464-0597.00152.  
38  
39  
40 61324. McQuide PA, Kolehmainen-Aitken RL, Forster N. Applying the workload indicators of staffing  
41  
42 614 need (WISN) method in Namibia: challenges and implications for human resources for health  
43  
44 615 policy. *Human resources for health*. 2013 Dec;11(1):64. doi: 10.1186/1478-4491-11-64.  
45  
46  
47 61625. Namaganda G, Oketcho V, Maniple E, Viadro C. Making the transition to workload-based  
48  
49 617 staffing: using the Workload Indicators of Staffing Need method in Uganda. *Human resources for*  
50  
51 618 *health*. 2015 Dec;13(1):89.. doi: 10.1186/s12960-015-0066-7.  
52  
53  
54 61926. Burmen B, Owuor N, Mitei P. An assessment of staffing needs at a HIV clinic in a Western Kenya  
55  
56  
57  
58  
59  
60

- 1  
2  
3 620 using the WHO workload indicators of staffing need WISN, 2011. *Human resources for health*.  
4  
5 621 2017 Dec;15(1):9. doi: 10.1186/s12960-017-0186-3.  
6  
7 62227. Ly A, Kouanda S, Ridde V. Nursing and midwife staffing needs in maternity wards in Burkina  
8  
9 623 Faso referral hospitals. *Human resources for Health*. 2014 May;12(1):S8. doi: 10.1186/1478-  
10  
11 624 4491-12-S1-S8.  
12  
13  
14 62528. Nayebi BA, Mohebbifar R, Azimian J, Rafiei S. Estimating nursing staff requirement in an  
15  
16 626 emergency department of a general training hospital: Application of Workload Indicators of  
17  
18 627 Staffing Need (WISN). *International Journal of Healthcare Management*. 2017 Oct 17:1-6. doi:  
19  
20 628 10.1080/20479700.2017.1390182.  
21  
22  
23 62929. Zaman S. Ladies without lamps: nurses in Bangladesh. *Qualitative Health Research*. 2009  
24  
25 630 Mar;19(3):366-74. doi: 10.1177/1049732309331876.  
26  
27  
28 63130. Ministry of Public Administration. 'Standard setup by the government for human resources in 10,  
29  
30 632 20, 31, 50, 100, 150, 200, 250, 500, 500 bed general hospitals at Union, Upazila, District, and  
31  
32 633 Division levels, under Ministry of Health and Family Welfare'. Bangladesh. 2008.  
33  
34  
35 634  
36  
37  
38 635  
39  
40  
41  
42  
43  
44  
45  
46  
47  
48  
49  
50  
51  
52  
53  
54  
55  
56  
57  
58  
59  
60

## Figure 1

Comparative analysis of WISN Ratio across different geographical areas (and health facilities therein)

- can help decision-making on recruitment of new staff and transfer of existing staff

Comparative analysis of WISN Ratio across comparable staff categories

- can help decision-making on allocating new functions on certain staff categories or removing their functions to other staff

Comparative analysis of current professional standards with the activity standards (developed for the WISN study)

- can help evaluating current professional performance and decision-making on additional staff requirement for performance improvement

Analysis of projected workload

- can help decision-making on future staffing of health facilities

Alternative scenario based WISN analysis (e.g., changing length of working week, changing leave days, changing training policies, etc.)

- can help examining the impact of different conditions on staff requirement

**Figure 1. The ways WISN can help in human resource decision-making**

**Figure 2**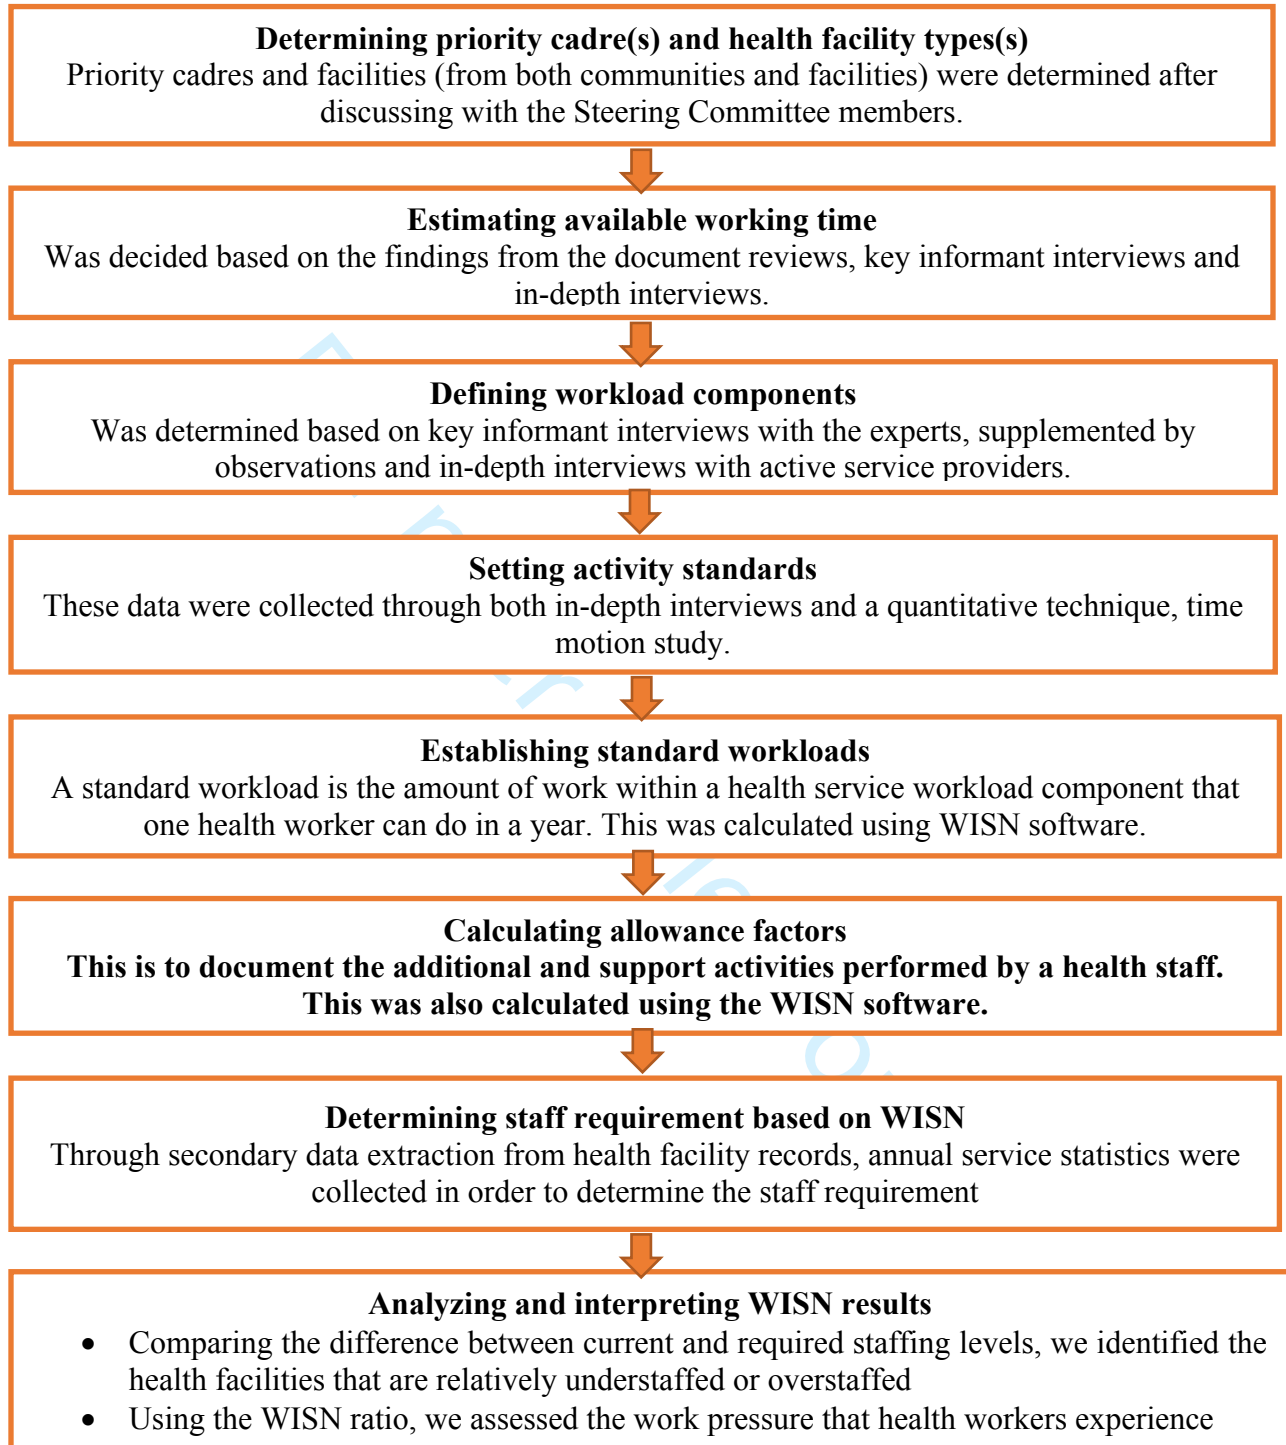**Figure 1 Methods applied in each WISN step**

Figure 3

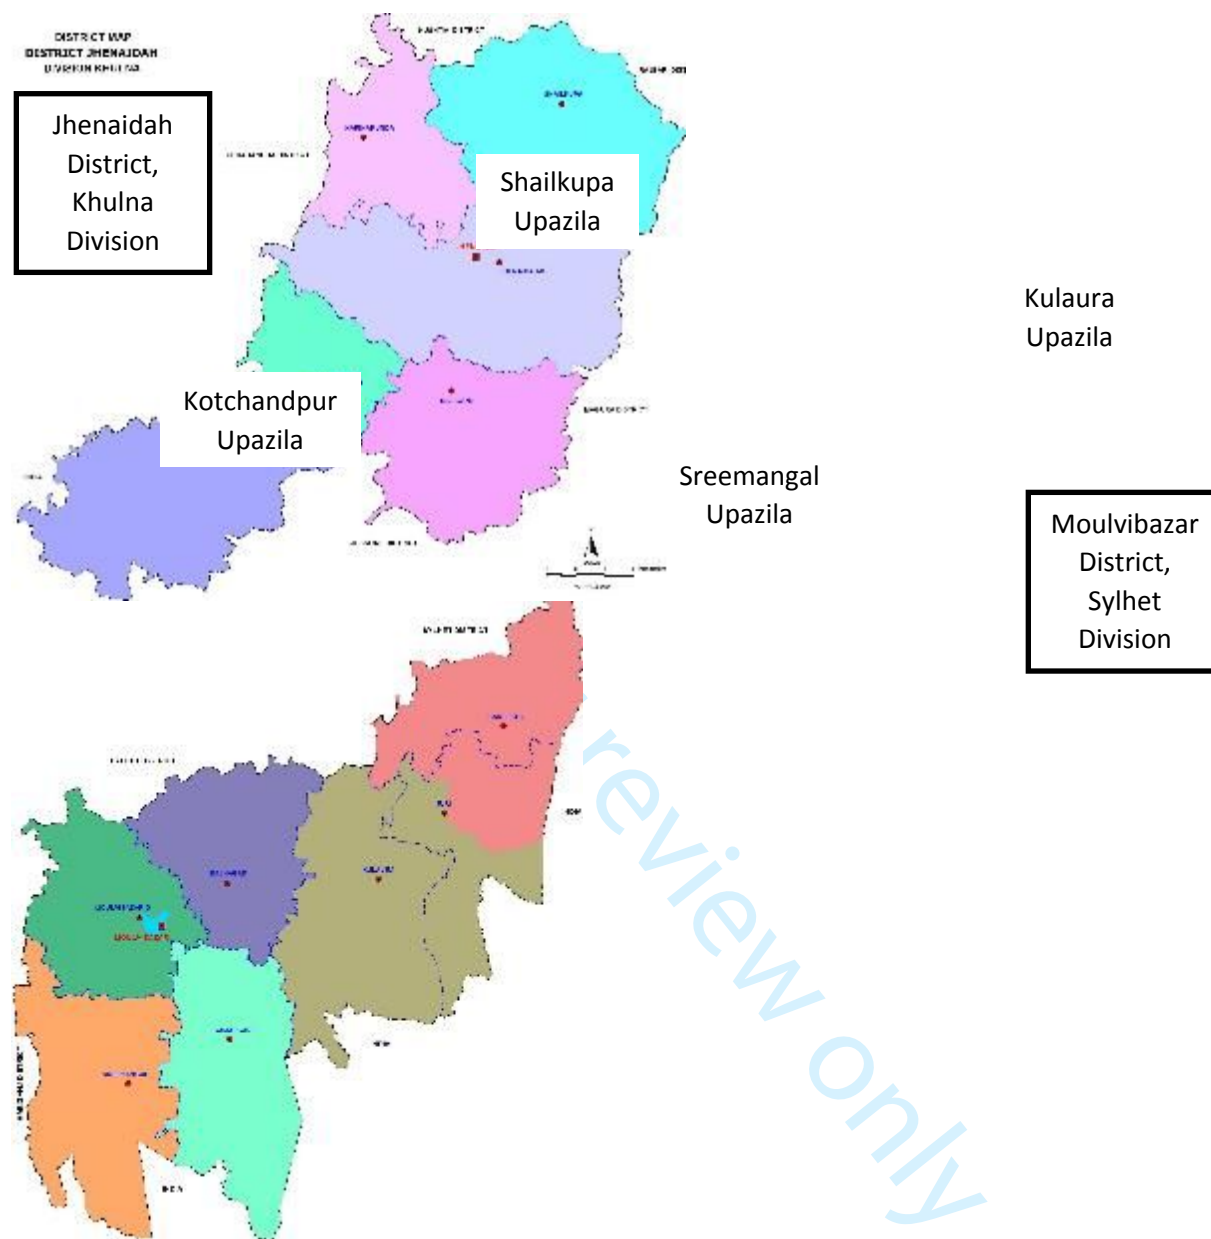

Figure 1 Map of Jhenaidah and Moulvibazar Districts with study Upazilas identified

Figure 4

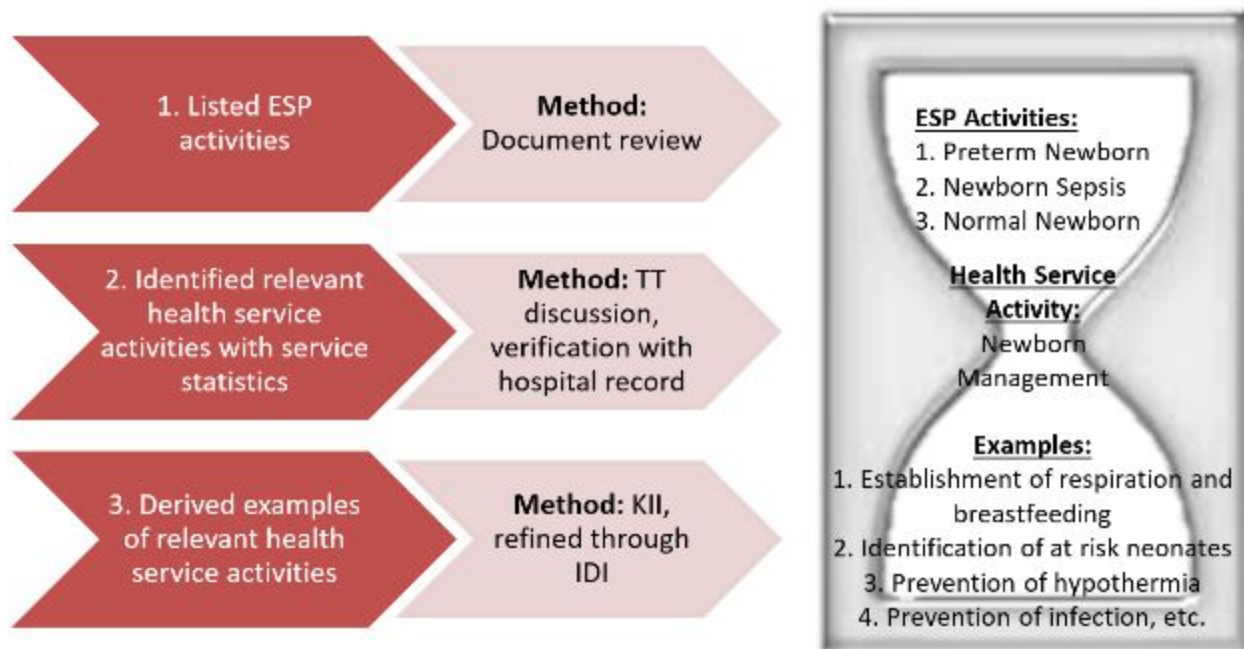

**Figure 1 Approach of integration of ESP components in defining workload components of health service activity**

# BMJ Open

## An assessment of staffing needs for physicians and nurses at Upazila Health Complexes in Bangladesh using WHO workload indicators of staffing need (WISN) method

|                                 |                                                                                                                                                                                                                                                                                                                                                                                                                                                                              |
|---------------------------------|------------------------------------------------------------------------------------------------------------------------------------------------------------------------------------------------------------------------------------------------------------------------------------------------------------------------------------------------------------------------------------------------------------------------------------------------------------------------------|
| Journal:                        | <i>BMJ Open</i>                                                                                                                                                                                                                                                                                                                                                                                                                                                              |
| Manuscript ID                   | bmjopen-2019-035183.R1                                                                                                                                                                                                                                                                                                                                                                                                                                                       |
| Article Type:                   | Original research                                                                                                                                                                                                                                                                                                                                                                                                                                                            |
| Date Submitted by the Author:   | 15-Dec-2019                                                                                                                                                                                                                                                                                                                                                                                                                                                                  |
| Complete List of Authors:       | Joarder, Taufique; BRAC University, BRAC James P Grant School of Public Health; FHI 360, Bangladesh Office<br>Tune, Samiun; BRAC James P Grant School of Public Health, BRAC University, Public Health;<br>Nuruzzaman, Md; World Health Organization Bangladesh<br>Alam, Sabina; Government of Bangladesh Ministry of Health and Family Welfare, Health Services Division<br>Cruz, Valeria; World Health Organization, Country Office for Bangladesh<br>Zapata, Tomas; SEARO |
| <b>Primary Subject Heading</b>: | Health services research                                                                                                                                                                                                                                                                                                                                                                                                                                                     |
| Secondary Subject Heading:      | Health policy, Global health, Nursing, Public health                                                                                                                                                                                                                                                                                                                                                                                                                         |
| Keywords:                       | Health policy < HEALTH SERVICES ADMINISTRATION & MANAGEMENT, PUBLIC HEALTH, HEALTH SERVICES ADMINISTRATION & MANAGEMENT, Human resource management < HEALTH SERVICES ADMINISTRATION & MANAGEMENT                                                                                                                                                                                                                                                                             |
|                                 |                                                                                                                                                                                                                                                                                                                                                                                                                                                                              |

SCHOLARONE™  
Manuscripts





I, the Submitting Author has the right to grant and does grant on behalf of all authors of the Work (as defined in the below author licence), an exclusive licence and/or a non-exclusive licence for contributions from authors who are: i) UK Crown employees; ii) where BMJ has agreed a CC-BY licence shall apply, and/or iii) in accordance with the terms applicable for US Federal Government officers or employees acting as part of their official duties; on a worldwide, perpetual, irrevocable, royalty-free basis to BMJ Publishing Group Ltd ("BMJ") its licensees and where the relevant Journal is co-owned by BMJ to the co-owners of the Journal, to publish the Work in this journal and any other BMJ products and to exploit all rights, as set out in our [licence](#).

The Submitting Author accepts and understands that any supply made under these terms is made by BMJ to the Submitting Author unless you are acting as an employee on behalf of your employer or a postgraduate student of an affiliated institution which is paying any applicable article publishing charge ("APC") for Open Access articles. Where the Submitting Author wishes to make the Work available on an Open Access basis (and intends to pay the relevant APC), the terms of reuse of such Open Access shall be governed by a Creative Commons licence – details of these licences and which [Creative Commons](#) licence will apply to this Work are set out in our licence referred to above.

Other than as permitted in any relevant BMJ Author's Self Archiving Policies, I confirm this Work has not been accepted for publication elsewhere, is not being considered for publication elsewhere and does not duplicate material already published. I confirm all authors consent to publication of this Work and authorise the granting of this licence.

1  
2  
3  
4  
5  
6  
7  
8  
9  
10  
11  
12  
13  
14  
15  
16  
17  
18  
19  
20  
21  
22  
23  
24  
25  
26  
27  
28  
29  
30  
31  
32  
33  
34  
35  
36  
37  
38  
39  
40  
41  
42  
43  
44  
45  
46  
47  
48  
49  
50  
51  
52  
53  
54  
55  
56  
57  
58  
59  
60

1 **\*\*Title page**

2 **An assessment of staffing needs for physicians and nurses at Upazila Health**  
3 **Complexes in Bangladesh using WHO workload indicators of staffing need**  
4 **(WISN) method**

5 Taufique Joarder<sup>1,2</sup>, Samiun Nazrin Bente Kamal Tune<sup>1\*</sup>, Md Nuruzzaman<sup>3</sup>, Sabina Alam<sup>4</sup>,  
6 Valeria de Oliveira Cruz<sup>5</sup>, Tomas Zapata<sup>5</sup>

7  
8 <sup>1</sup>BRAC James P Grant School of Public Health, BRAC University, Dhaka

9 <sup>2</sup>FHI360, Dhaka, Bangladesh

10 <sup>3</sup>World Health Organization Country Office for Bangladesh, Dhaka

11 <sup>4</sup>Health Services Division, Ministry of Health and Family Welfare, Government of Bangladesh

12 <sup>5</sup>World Health Organization South-East Asia Regional Office, New Delhi

13  
14 Email addresses:

15 TJ: [taufiquejoarder@gmail.com](mailto:taufiquejoarder@gmail.com)

16 SNBKT: [samiun.tune@gmail.com](mailto:samiun.tune@gmail.com)

17 MN: [nuruzzamanm@who.int](mailto:nuruzzamanm@who.int)

18 SA: [alam6350@gmail.com](mailto:alam6350@gmail.com)

19 VOC: [deoliveiracruzv@who.int](mailto:deoliveiracruzv@who.int)

20 TZ: [zapatat@who.int](mailto:zapatat@who.int)

21  
22 \*Corresponding author

## 23 **Abstract**

24 **Objective** This study aimed to assess the current workload and staffing need of Physicians and  
25 Nurses for delivering optimum health care services at the Upazila Health Complexes (UpHCs) in  
26 Bangladesh.

27 **Design** Mixed-methods, combining qualitative (e.g., document reviews, key informant interviews,  
28 in-depth interviews, observations) and quantitative methods (time-motion survey)

29 **Setting** Study was conducted in 24 health facilities of Bangladesh. However, UpHCs being the  
30 nucleus of primary health care in Bangladesh, this manuscript limits itself to reporting the findings  
31 from the providers at four UpHCs under this project.

32 **Participants** 18 Physicians and 51 Nurses, males and females.

33 **Primary outcome measures** Workload components were defined based on inputs from five  
34 experts, refined by nine service providers. Using WHO WISN software, standard workload,  
35 category allowance factor, individual allowance factor, total required number of staff, WISN  
36 Difference, and WISN Ratio were calculated.

37 **Results:** Physicians have Very High (WISN Ratio 0.43) and Nurse High (WISN Ratio 0.69)  
38 workload pressure. 50% of Nurses' time are occupied with support activities, instead of nursing  
39 care. There are different workloads among the same staff category in different health facilities. If  
40 only the vacant posts are filled, the workload is reduced. In fact, sanctioned number of Physicians  
41 and Nurses is more than actual need.

42 **Conclusions:** It is evident that high workload pressures prevail for Physicians and Nurses at the  
43 UpHCs. This reveals high demand for these health workforces in the respective sub-districts.  
44 WISN method can aid the policy-makers in optimizing utilization of existing human resources.  
45 Therefore, the government should adopt flexible health workforce planning and recruitment policy

1  
2  
3 46 to manage the patient load and disease burden. WISN should thus be incorporated as a planning  
4  
5 47 tool for health managers. There should be a regular review of health workforce management  
6  
7  
8 48 decisions, and these should be amended based on periodic reviews.  
9  
10  
11 49

## 12 13 50 **Strengths and limitations**

- 15 51 • Time-motion findings helped the experts suggest a more context sensitive activity  
16  
17 52 standards.
- 18  
19  
20 53 • Using both qualitative and quantitative methods for primary data collection complemented  
21  
22 54 each other for bringing data accuracy.
- 23  
24  
25 55 • Technical inputs from the WHO technical experts in WISN application in other countries,  
26  
27 56 and officials of the Ministry of Health improved the data quality as they were directly  
28  
29 57 involved in quality checks at the field level.
- 30  
31  
32 58 • One limitation was that some service statistics data, essential for establishing standard  
33  
34 59 workloads, were unavailable.
- 35  
36 60 • Due to lack of scope in WISN methodology, patient engagement was minimal.
- 37  
38

## 39 61 **Keywords**

40  
41  
42 62 Human Resources for Health, Workforce Management, Workload Indicators of Staffing Need,  
43  
44 63 Bangladesh, Upazila Health Complex, Health Systems  
45  
46  
47 64

## 65 **Background**

66 Shortage of Human Resources for Health (HRH) has been one of the major challenges faced by the  
67 health system and globally, more than 90 countries are haunted by this crisis. According to  
68 International Labor Organization (ILO), there are on average 34.5 health workers per 10,000  
69 population and about one third of the world's population lack access to health care because of  
70 shortage of health workforce<sup>1</sup>. According to the Global strategy on human resources for health:  
71 workforce 2030, the estimated global shortage of skilled health workers will be around 18 million  
72 by 2030<sup>2</sup>. This problem has reached a critical stage in three (Bangladesh, Myanmar and Bhutan)  
73 South-East Asia Region countries with <23 health workers (doctors, nurses and midwives)  
74 per 10,000 population, limiting access to health services<sup>3</sup>.

76 Improving health workers' performance and productivity is vital for better health service provision  
77 in the country. Poor performance of the health workers has been reported in the literature resulting  
78 from too few staff, or staff not providing care according to standards<sup>4,5,6</sup>. The extent of the shortage  
79 is reflected in health worker density rates and workforce vacancy rates, and its impact in health  
80 system performance indicators. Factors that contribute to poor performance of health workers  
81 include limited employment opportunities and low salaries; poor working conditions, weak  
82 support and supervision, and limited opportunities for professional development<sup>7</sup>.

84 Bangladesh's health workforce scenario is characterized by "shortage, inappropriate skill mix and  
85 inequitable distribution"<sup>8,9</sup>. Equitable access to skilled and motivated health worker in a functional  
86 health system is essential for achieving Universal Health Coverage (UHC) and the Sustainable  
87 Development Goals<sup>10</sup>. In 2015, Government of Bangladesh (GoB) approved the Bangladesh

1  
2  
3 88 Health Workforce Strategy which affirms government's vision of equitable availability of skilled,  
4  
5 89 motivated and responsive health workforce in adequate numbers across the country<sup>11</sup>. However,  
6  
7 90 there is lack of comprehensive, nationally representative data on HRH workload and optimum staff  
8  
9 91 need in health care facilities in Bangladesh. A small scale qualitative study found overwhelming  
10  
11 92 workload as one of the critical components that hinders retention of doctors and nurses at rural  
12  
13 93 healthcare facilities in Bangladesh<sup>12</sup>. Another policy analysis on retention of HRH (physicians and  
14  
15 94 nurses) also found that deficiency of adequate workforce and consequent high workload acted as  
16  
17 95 a deterrent against rural retention<sup>13</sup>.

18  
19  
20  
21 96  
22  
23 97 Workload management is very important for any country or institution to deliver quality services,  
24  
25 98 retain staffs and reduce turnover<sup>14</sup>. Even the seminal document on HRH, "Global strategy on  
26  
27 99 human resources for health: Workforce 2030", emphasized on developing country level workforce  
28  
29 100 strategies, drawing on workload analysis studies<sup>15</sup>. Such studies can provide detailed insight into  
30  
31 101 the current state of workload in a system, coping strategies of the staff for regular extra work  
32  
33 102 pressure, causes behind the excessive workloads, and ways to deal with it. This study aimed to fill-  
34  
35 103 in this knowledge gap with respect to workload and optimum staff need for physicians and nurses  
36  
37 104 at the Upazila or Sub-district level (i.e., at Upazila Health Complex [UpHC]). It is expected that  
38  
39 105 this workload analysis will contribute in improving performance, ensuring quality of services, and  
40  
41 106 facilitating uninterrupted service delivery through efficient management of staff.  
42  
43  
44  
45  
46  
47  
48  
49

## 108 **Workload Indicator of Staffing Need (WISN) overview**

50  
51  
52  
53 109 WHO developed the Workload Indicator of Staffing Need (WISN) method in 1998, which was  
54  
55 110 later updated based on learning from implementation in different countries. This method is simple,  
56  
57  
58  
59  
60

1  
2  
3 111 useful and time-saving, which was borrowed from the industrial sector for use in the health sector  
4  
5 112 by Peter Shipp in 1984. The result is expressed in terms of differences and ratios, the former  
6  
7 113 indicating worker shortage or surplus, and the latter workload pressure experienced by the staff<sup>16</sup>.  
8  
9 114  
10  
11  
12 115 WISN results help in human resource decision-making in several ways (Figure 1). For example,  
13  
14 116 recruitment and transfer of HRH can be based on geographic comparison of WISN ratios, staffing  
15  
16 117 of health facilities can be informed by WISN-based workload projection, etc.

## 19 118 **Methods**

### 23 119 **Study design**

24  
25 120 We followed the updated WISN manual<sup>16</sup>, but contextualized it for Bangladeshi setting. The WISN  
26  
27 121 steps have been summarized in Figure 2. The research project was developed based on close  
28  
29 122 collaboration among and mutual insights from three types of committees:

- 32 123 1. **Steering Committee (SC):** The SC was consisting 13 members, established by the Ministry  
33  
34 124 of Health and Family Welfare (MOHFW) with membership from senior government officials  
35  
36 125 (seven): WHO official (one); professional organization of the physicians, Bangladesh Medical  
37  
38 126 Association (one); and relevant academia (four) such as BRAC University (two persons),  
39  
40 127 Bangladesh University of Health Sciences, and Center for Medical Education. All seven senior  
41  
42 128 government officials were directly involved in decision making regarding daily management  
43  
44 129 of the health workforce in their respective departments. WHO officer was there to respond to  
45  
46 130 WISN related technical issues and application. All four academicians were part of the  
47  
48 131 committee because they had expertise in their respective areas (i.e. education, policy making,  
49  
50 132 curriculum development and performance assessment) of the health workforce. They were also  
51  
52  
53  
54  
55  
56  
57  
58  
59  
60

1  
2  
3 133 well known in the community of scientific writing and academic teaching. The role of the SC  
4  
5 134 was to guide and endorse the overall study based on the WISN strategy and its implementation.  
6  
7

8 135 2. **Technical Taskforce (TT):** TT was responsible for guiding the implementation of the WISN  
9  
10 136 process. Researchers from implementing research institution (the school of public health of a  
11  
12 137 Bangladeshi university, BRAC University); and experts from WHO Bangladesh Country  
13  
14 138 Office; an international non-governmental organization (NGO), Save the Children; and  
15  
16 139 another university, Bangladesh University of Health Sciences served in the Taskforce.  
17  
18

19 140 3. **Expert Working Groups (EWG):** There were multiple EWGs, one for each of the following  
20  
21 141 professional groups: General Physicians (Medical Officer [MO], Emergency Medical Officer  
22  
23 142 [EMO], Residential Medical Officer [RMO]), and Nursing Staff (Senior Staff Nurse, Nursing  
24  
25 143 Supervisor). The respective EWG defined the workload components and set activity standard  
26  
27 144 for the specific staff category.  
28  
29

30  
31 145 The qualitative part of this research involved document reviews, key informant interviews (KII)  
32  
33 146 with policy level persons related to HRH issues in Bangladesh (mostly from among SC and EWG  
34  
35 147 members), in-depth interviews (IDI) with individual service providers (e.g., physicians, nurses,  
36  
37 148 etc. working in UpHCs under this study), and observations. The quantitative component involved  
38  
39 149 time-motion survey which is a work measurement technique for recording the times and rates of  
40  
41 150 working for the elements of a specific job though observing a subject continuously or in a certain  
42  
43 151 period of time<sup>17</sup>. Time motion data served as a guide to determine the activity standard for WISN  
44  
45 152 analyses.  
46  
47  
48  
49

50 153  
51  
52  
53  
54  
55  
56  
57  
58  
59  
60



## 154 **Study duration, setting and population**

155 The research continued from July to November 2017 and was carried out in two pre-selected  
156 Districts of Bangladesh (Figure 3):

- 157 • Jhenaidah, located in south-western part of Bangladesh, under Khulna Division
- 158 • Moulvibazar, located in north-eastern part of Bangladesh, under Sylhet Division

159  
160 The selection of the districts was made by the Human Resources Unit, Ministry of Health and  
161 Family Welfare **in collaboration with the development partners (Save the Children and WHO**  
162 **Bangladesh) in a workshop nationally organized in November 2016. Later the selection of**  
163 **the UpHCs was made in consultation with the SC, taking into consideration some**  
164 **performance indicators such as** number of beds, number of total deliveries, number of live births,  
165 bed occupancy rates as well as patient load including the number of outpatient visits. **From each**  
166 **district, two highest performing UpHCs were included in the study**<sup>18</sup>. Thus, Shailkupa and  
167 Kotchandpur UpHCs were selected from Jhenaidah District and Kulaura and Sreemangal from the  
168 Moulvibazar. Because future applications need to be based on optimum quality standards, the  
169 highest performing UpHCs were selected to serve as a model for other health facilities. From each  
170 of these four UpHCs, physicians (Medical Officers and Residential Medical Officers) and nurses  
171 (Senior Staff Nurse and Nursing Supervisor) were included for workload analysis. A total of 24  
172 health facilities from the two districts were studied. This included two district hospitals, four  
173 UpHCs, two Maternal and Child Welfare Centers, eight Union Sub Centers, eight Union Health  
174 and Family Welfare Centers, and eight Community Clinics. This manuscript reported findings  
175 from all the four UpHCs under this study, as UpHCs are the nucleus of the primary health care  
176 delivery in Bangladesh, serving the rural population.

1  
2  
3 177  
4  
56 178 **Sampling strategy**  
7  
89 179 **Qualitative part**  
10  
11

12 180 Documents for review were selected based on the suggestions from the experts (members of SC,  
13  
14 181 TT, and EWG), supplemented by reference tracking of government reports and published literature  
15  
16 182 on HRH of Bangladesh. Key Informants were selected on the principles of purposive sampling<sup>19</sup>,  
17  
18 183 supplemented by snowball sampling (i.e., based on the reference or suggestion from the key  
19  
20 184 informants). IDI respondents were selected through purposive sampling, based on the respondent's  
21  
22 185 seniority and designation (e.g., Residential Medical Officer, Nursing Supervisors, etc.). These  
23  
24 186 respondents were practicing individuals and had more than 10 years of experience and played a  
25  
26 187 supervisory role in their respective health facilities.  
27  
28  
29

30 188  
31  
3233 189 **Quantitative part**  
34  
35

36 190 For time-motion study, time sampling was done for each consenting staff available during the data  
37  
38 191 collection period. Field Data Collectors (FDCs) observed each staff twice for 45-minutes duration,  
39  
40 192 once during the first half of their service duration and again during the second half. This was done  
41  
42 193 to minimize the bias in the time data due to the patient load (assuming higher patient load in the  
43  
44 194 first half and lower in the second).  
45  
46  
47

48 195  
49  
50  
51  
52  
53  
54  
55  
56  
57  
58  
59  
60

## 196 **Tool development, pretest, training of data collectors, agreement test**

197 For qualitative data collection, semi-structured guidelines, including that for document reviews,  
198 KIIs, IDIs, and observation, were developed. For the time-motion study, structured observation  
199 tool was designed. The structured observation tools contained three sections:

- 200 1. Background information of observation setting and the person under observation
- 201 2. Time-motion data sheet (containing three columns: type of activity, time spent in minutes,  
202 and remarks)
- 203 3. Example of the activities (health service activities, support activities, and additional  
204 activities)

205  
206 Health service activities, according to WISN manual, are performed by all members of the staff  
207 category and regular service statistics are available for them for example, obstetrical service,  
208 emergency service, outpatient service, etc. Support activities are also performed by all members  
209 of the staff category, but regular service statistics are not available for them for example, record  
210 keeping and reporting, attending meetings, instrument sterilization, etc. Additional activities are  
211 performed by only certain members of the staff category (e.g., the supervisor or a senior member),  
212 and regular service statistics are not available for them for example, duty roster preparation,  
213 preparing staff evaluation reports, supervision of cleanliness, etc.<sup>17</sup>.

214  
215 The examples of health service activities were primarily drawn from the list of the activities  
216 mentioned in the Essential Services Package (ESP)<sup>20</sup> for respective health facility type. Since  
217 service statistics were not available according the ESP activity list, it was adjusted for the local  
218 context with inputs from the respondents (through KII, followed by IDI), in alignment with the

1  
2  
3 219 availability of service statistics. An ‘hourglass’ approach was adopted for defining the workload  
4  
5 220 components based on the ESP (Figure 4). Tools were pre-tested in a UpHC near Dhaka, before  
6  
7 221 applying for actual data collection. Qualitative tools were also pre-tested through mock IDIs and  
8  
9 222 KIIs. The pre-testing exercise was followed by the training of the Field Supervisors (FSs) and  
10  
11 223 Field Data Collectors (FDCs).  
12  
13  
14  
15 224

### 18 225 **Data collection and quality control**

19  
20  
21 226 At first, FSs were sent to respective districts to orient the personnel on the project, seek support,  
22  
23 227 and assess the availability of the service statistics. The FSs spent one week in each district and  
24  
25 228 conducted qualitative observation of the service provision at the UpHCs, to gain a firsthand  
26  
27 229 understanding of the context.  
28  
29

30 230  
31  
32 231 In the second step, we conducted five KIIs to define workload components, in light of the ESP  
33  
34 232 document’s standard of services by facility level<sup>20</sup>. The workload components were further refined  
35  
36 233 based on IDIs with a total of eight physicians and eight nurses.  
37  
38

39 234  
40  
41 235 In the third step, the FDCs, under the supervision of FSs, conducted time-motion study, using a  
42  
43 236 mobile device (SurveyCTO software). During the time FDCs were collecting time-motion data,  
44  
45 237 the FS, in addition to supervising the FDCs, conducted additional IDIs and collected data on  
46  
47 238 available working time; time required for health service, support, and additional activities; and  
48  
49 239 service statistics.  
50  
51  
52

53 240  
54  
55  
56  
57  
58  
59  
60

241 The next step was data validation and set activity standards. Primary data validation was done  
 242 through phone calls made to the services providers, and health facility statisticians. Secondly, these  
 243 were shared with the SC and TT members. Finally, interviews were conducted with the EWG  
 244 members to finalize the activity standards (Table 1).

246 **Table 1 Number of interviewees representing EWG of staff categories**

| EWG representing staff category                | Number |
|------------------------------------------------|--------|
| Physicians: MO, EMO, RMO                       | 2      |
| Nurses: Nursing Supervisor, Senior Staff Nurse | 7      |
| Total                                          | 9      |

247  
 248 We presented the time-motion findings to the EWG members and requested them to be as realistic  
 249 as possible in suggesting activity standards. We also requested them to account for the variability  
 250 of patient load due to factors such as seasonality, timing of day, facility catchment population, etc.  
 251 Finally, through multiple meetings, debates and deliberations, the activity standard was finalized,  
 252 taking into account the information from the IDIs and KIIs, and inputs from the EWG members  
 253 (Table 2).

254  
 255 **Table 2 Service standard for Physicians and Nurses in UpHCs, Bangladesh, 2017**

| Activities | Service standard |       | Unit |
|------------|------------------|-------|------|
|            | Physician        | Nurse |      |

|                                                                          |                |                |                   |
|--------------------------------------------------------------------------|----------------|----------------|-------------------|
| Obstetrical Service (Caesarean Section) <sup>a</sup>                     | 90             | 90             | min/patient       |
| Obstetrical Service (Normal Delivery)                                    | 60             | 120            | min/patient       |
| Newborn Management                                                       | 15             | 15             | min/inpatient day |
| Emergency Service                                                        | 15             | Not applicable | min/patient       |
| IMCI/ Nutritional Service                                                | 15             | 15             | min/patient       |
| OPD Service (including NCD management)                                   | 10             | Not applicable | min/patient       |
| First ANC                                                                | 20             | 20             | min/patient       |
| Follow-up ANC                                                            | 10             | 10             | min/patient       |
| PNC                                                                      | 15             | 15             | min/patient       |
| Indoor Services (Round, including minor bedside procedures) <sup>b</sup> | 25.65          | 34             | min/inpatient day |
| Bedside patient care                                                     | Not applicable | 17             | min/inpatient day |
| Patient admission and discharge                                          | Not applicable | 20             | min/inpatient day |
| Death certification and associated arrangements                          | 20             | 30             | min/patient       |

256 **Note:** <sup>a</sup>For Nurses: Assist Obstetrical Service (Caesarean Section); <sup>b</sup>For Nurses: Indoor Services  
 257 (Round with Physician)

258 # IMCI: Integrated Management of Childhood Illness; OPD: Out Patient Department; NCD: Non-  
 259 communicable Diseases; ANC: Antenatal Care; PNC: Postnatal Care.

1  
2  
3 260  
4  
5  
6  
7 261 In order to ensure the quality of data, the Principal Expert (lead author of this article), Co-experts  
8  
9 262 (two co-experts – one was leading data collection and the other was leading data quality check and  
10  
11 263 reporting), WHO team consisting of national and international technical experts, and officials from  
12  
13 264 the Human Resource Branch of Ministry of Health and Family Welfare (MoHFW) conducted field  
14  
15  
16 265 visits to each study District and the health facilities therein. During the time-motion data collection  
17  
18 266 period, the Co-experts monitored the data and their geographic location in real-time. They also  
19  
20  
21 267 regularly checked the consistency of the data. Our field based data collection team saved contact  
22  
23 268 information of all the respondents; so, in case of any confusion or need for clarification, the Co-  
24  
25 269 experts called the respondents over phone.

26  
27  
28 270  
29  
30

### 31 **Data management and analysis**

32  
33  
34 272 The first analytic step was to estimate available working time of the staffs. This is the time a health  
35  
36 273 worker has available in one year to do his or her work, taking into account authorized and  
37  
38 274 unauthorized absences<sup>17</sup>. For all categories of staff, a uniform number of weeks per year (52  
39  
40 275 weeks), working days in one week (six days), possible working days in one year ( $52 * 6 = 312$   
41  
42 276 days) were estimated. Next, absent days, such as public holidays (20 days), earned leave (average  
43  
44 277 for each staff category, based on Health Management Information System data), and casual leave  
45  
46 278 (20 days) were deducted to obtain the annual working time in days. Multiplying this with daily  
47  
48 279 working hours (six hours per day), we obtained annual working time in hours.

49  
50  
51  
52 280  
53  
54  
55  
56  
57  
58  
59  
60

1  
2  
3 281 Workload components were defined through the inputs from the key informants; activity standards  
4  
5 282 were also set through the interviews with the EWG members. An activity standard is the time  
6  
7 283 necessary for a well-trained, skilled and motivated worker to perform an activity to professional  
8  
9 284 standards in the local circumstances<sup>17</sup>. Both service standards (for health service activities),  
10  
11 285 category allowance standards (for support activities), and individual allowance standards (for  
12  
13 286 additional activities) were determined in the same way.  
14

15  
16  
17 287 The next analytic step was to establish standard workload, which was done by dividing the annual  
18  
19 288 working time by unit time of health service activities. A standard workload is the amount of work  
20  
21 289 within a health services workload component that one health service provider can do in a year  
22  
23 290 hypothetically<sup>17</sup>. Then category allowance factor and individual allowance factors were calculated  
24  
25 291 using the following formula, respectively:  
26

27  
28 292 Category allowance factor =  $1 / \{1 - (\text{Total category allowance standard} / 100)\}$   
29

30  
31 293 Individual allowance factor =  $\text{Total individual allowance standard} / \text{Available working time in}$   
32  
33 294 hours  
34

35  
36 295

37  
38 296 Next, exact number of required staff was calculated by the following formula:  
39

40 297 Total required number of staff =  $(\text{Staff needed for health service activity} * \text{Category allowance}$   
41  
42 298  $\text{factor}) + \text{Individual allowance factor}$   
43

44  
45 299 The fractional results were rounded up or down, following the guideline provided in the WISN  
46  
47 300 manual<sup>17</sup>:  
48

49 301 • 1.0 – 1.1 is rounded down to 1 and >1.1 – 1.9 is rounded up to 2

50  
51 302 • 2.0 – 2.2 is rounded down to 2 and >2.2 – 2.9 is rounded up to 3

52  
53 303 • 3.0 – 3.3 is rounded down to 3 and >3.3 – 3.9 is rounded up to 4  
54  
55  
56  
57  
58  
59  
60



- 304 • 4.0 – 4.4 is rounded down to 4 and >4.4 – 4.9 is rounded up to 5
- 305 • 5.0 – 5.5 is rounded down to 5 and >5.5 – 5.9 is rounded up to 6

307 Finally, based on the existing number of staff in the respective health facilities, we calculated both  
308 the difference (current number of staff – required number of staff by WISN), and the ratio (current  
309 number of staff / required number of staff by WISN). The WISN difference indicates whether the  
310 health facilities are relatively understaffed (i.e., when the WISN difference is negative),  
311 overstaffed (i.e., when the WISN difference is positive), or balanced (i.e., when the WISN  
312 difference is zero). The WISN Ratio indicates whether the staffs are experiencing high workload  
313 (i.e., when the WISN Ratio is lower than one), low workload (i.e., when the WISN Ratio is higher  
314 than one), or normal workload (i.e., when the WISN Ratio is equal to one). For this calculation,  
315 we used the de-facto number of current staff, i.e., the number of staff that we actually found  
316 working in the health facilities during our data collection period; not the number shown in the  
317 office records or statistics.

### 319 **Ethical considerations**

320 Ethical approval for this study was obtained from the Ethical Review Committee (ERC) of BRAC  
321 James P Grant School of Public Health, BRAC University. All ethical principles were strictly  
322 adhered to. We obtained a support letter from the Ministry of Health and Family Welfare and also  
323 obtained written informed consent form from each person we engaged in data collection. Identity  
324 of respondents was kept confidential.

## 326 Results

### 327 General WISN findings across levels

328 For descriptive purposes, we have categorized the workload pressure as Extremely High (WISN  
 329 Ratio between 0.10 and 0.29), Very High (WISN Ratio between 0.30 and 0.49), High (WISN Ratio  
 330 between 0.50 and 0.69), Moderately High (WISN Ratio between 0.70 and 0.89), Normal (WISN  
 331 Ratio between 0.90 and 1.19), and Low (WISN Ratio greater than or equal to 1.20). Based on this  
 332 categorization, at an aggregate level (i.e., considering the average required number and WISN  
 333 Ratio across the same types of health facilities), physicians are found to have a Very High (WISN  
 334 Ratio 0.43) and nurses High (WISN Ratio 0.69) workload pressure. To cope with the workload,  
 335 on an average 11 physicians (on average 4.50 were available during data collection) and 19 nurses  
 336 (On average 12.75 were available during data collection) are needed in each UpHC (Table 3). This  
 337 means, there was an average deficit of six members in each staff categories.

338

339 **Table 3 Analysis of WISN results at aggregate level (average required number and WISN**  
 340 **Ratio across same types of health facilities)**

| Staff category | Required staff to cope with the demand | Average number of existing staff | Deficit of staff | Average WISN Ratio | Workload pressure |
|----------------|----------------------------------------|----------------------------------|------------------|--------------------|-------------------|
| Physician      | 10.59                                  | 4.50                             | 6.09             | 0.43               | Very high         |
| Nurse          | 18.86                                  | 12.75                            | 6.11             | 0.69               | High              |

341

342 Tabulating the total percentage of time spent on all support activities (i.e., category allowance  
 343 standards) by different staff categories, we found that, 50% of nurses' time are occupied with  
 344 support activities (Table 4).

346 **Table 4 Comparison of Support Activities across staff categories**

| Staff category | Total % of support activities |
|----------------|-------------------------------|
| Physician      | 24%                           |
| Nurse          | 50%                           |

347

348 **WISN results disaggregated by UpHCs**

349 The required number of staff ranges from eight to 12 among Physicians, and 16 to 23 among  
 350 Nurses. Highest shortage is observed in Nurses of Sreemangal UpHC (-8.46), followed by  
 351 Physicians of Kulaura UpHC (-8.28). Workload pressure is the highest among Physicians of  
 352 Kotchandpur UpHC (WISN Ratio 0.28) and lowest among Nurses of Shailkupa (WISN Ratio 0.87)  
 353 (Table 5).

355 **Table 5 Analysis of WISN results of Upazila level health staff**

| Health facility                  | Current number of staff | Required number, based on WISN | Shortage or excess | WISN Ratio | Workload pressure |
|----------------------------------|-------------------------|--------------------------------|--------------------|------------|-------------------|
| <b>Staff category: Physician</b> |                         |                                |                    |            |                   |

|                              |    |       |       |      |                    |
|------------------------------|----|-------|-------|------|--------------------|
| Shailkupa UpHC               | 4  | 8.14  | -4.14 | 0.49 | Very High          |
| Kotchandpur<br>UpHC          | 3  | 10.71 | -7.71 | 0.28 | Extremely<br>High  |
| Kulaura UpHC                 | 4  | 12.28 | -8.28 | 0.33 | Very High          |
| Sreemangal<br>UpHC           | 7  | 11.23 | -4.23 | 0.62 | High               |
| <b>Staff category: Nurse</b> |    |       |       |      |                    |
| Shailkupa UpHC               | 14 | 16.08 | -2.08 | 0.87 | Moderately<br>High |
| Kotchandpur<br>UpHC          | 15 | 22.80 | -7.8  | 0.66 | High               |
| Kulaura UpHC                 | 10 | 16.08 | -6.08 | 0.62 | High               |
| Sreemangal<br>UpHC           | 12 | 20.46 | -8.46 | 0.59 | High               |

356

### 357 **Change of workload if vacancies are filled**

358 If the vacant posts are filled, understandably, the workload is reduced. In most of the cases,  
 359 sanctioned number of Physicians and Nurses is more than what is actually needed to tackle the  
 360 workload. However, only filling up the vacant posts are not enough in case of some of the staff  
 361 categories, such as the Nurses at Kotchandpur and Physicians at Sreemangal (Table 6).

362

363 **Table 6 Change of workload if vacancies in Physician and Nursing posts are filled**

| Health facility  | Staff category | Current number of staff | Required number, based on WISN | WISN Ratio | Sanctioned number of staff | WISN Ratio as per sanctioned number of staff |
|------------------|----------------|-------------------------|--------------------------------|------------|----------------------------|----------------------------------------------|
| Shailkupa UpHC   | Physician      | 4                       | 8.14                           | 0.49       | 10                         | 1.25                                         |
|                  | Nurse          | 14                      | 16.08                          | 0.87       | 21                         | 1.31                                         |
| Kotchandpur UpHC | Physician      | 3                       | 10.71                          | 0.28       | 20                         | 1.82                                         |
|                  | Nurse          | 15                      | 22.80                          | 0.66       | 20                         | 0.87                                         |
| Kulaura UpHC     | Physician      | 4                       | 12.28                          | 0.33       | 20                         | 1.67                                         |
|                  | Nurse          | 10                      | 16.08                          | 0.62       | 26                         | 1.62                                         |
| Sreemangal UpHC  | Physician      | 7                       | 11.23                          | 0.62       | 10                         | 0.91                                         |
|                  | Nurse          | 12                      | 20.46                          | 0.59       | 22                         | 1.10                                         |

364

365 **Discussion and recommendations**366 **Discussion**

367 Findings from this WISN study clearly indicates that the public-sector healthcare providers in  
 368 Bangladesh are suffering from a very high workload pressure. Nurses are predominantly occupied  
 369 with support activities rather than actual nursing care. There is unequal workload across UpHCs,  
 370 indicating potential for workforce re-distribution. The unequal workload mainly stems from

1  
2  
3 371 differing patient load, due to geographic location, number of catchment population, and  
4  
5 372 epidemiological characteristics, at different UpHCs. Inappropriate number of sanctioned posts  
6  
7 373 indicate the necessity of WISN-based workforce planning.  
8  
9

10 374  
11  
12 375 High workload pressure may arise from absolute or relative shortage of health workforce. Absolute  
13  
14 376 shortage appears when there is inadequate production of a particular staff category while relative  
15  
16 377 shortage appears when health workforce is not distributed evenly between the urban and rural areas  
17  
18 378 throughout the country for various reasons. For example, absolute shortage in HRH production is  
19  
20 379 revealed by the fact that there are only 4.90 registered physicians and 2.90 registered nurses per  
21  
22 380 10,000 populations<sup>18</sup>, rendering the country to be one of the 57 critical workforce shortage  
23  
24 381 countries in the world<sup>6</sup>. On top of this absolute shortage, Bangladesh also suffers from relative  
25  
26 382 shortage, as evidenced from the fact that physician to population ratio in urban areas is 1:1,500,  
27  
28 383 but in rural areas it is 1:15,000<sup>21</sup>. Workload pressure has some serious consequences as well,  
29  
30 384 namely, fatigue and burnout of service providers, lack of motivation, and compromised quality of  
31  
32 385 care<sup>22</sup>. High workload is, however, not unique to Bangladesh. WISN studies in Low- and Middle-  
33  
34 386 Income Countries (LMICs) like Namibia<sup>23</sup>, Uganda<sup>24</sup>, Kenya<sup>25</sup>, Burkina Faso<sup>26</sup>, and Iran<sup>27</sup> also  
35  
36 387 identified high workload pressure among their HRH.  
37  
38  
39  
40  
41  
42 388  
43  
44

45 389 It is expected that the nurses would spend most of their service times beside the patients, providing  
46  
47 390 nursing care. Unfortunately, this is not the case in Bangladesh as well as in some other comparable  
48  
49 391 settings. A qualitative study in Bangladesh showed, nurses' maximum time is spent on  
50  
51 392 administrative and paperwork tasks<sup>28</sup>. Excessive support activities of nurses is reported in studies  
52  
53 393 conducted in Iran<sup>27</sup>, and Uganda<sup>24</sup> as well. A recent WISN study conducted in Iran showed, nurses  
54  
55  
56  
57  
58  
59  
60

1  
2  
3 394 are overburdened; and support activities account for 31% of their workload<sup>27</sup>. Nurses' excessive  
4  
5 395 engagement in paperwork or other support activities may result from deficient human resource  
6  
7 396 planning and management.  
8  
9

10 397  
11  
12 398 Despite the fact that most of the staff are already overworked, staffs in some health facilities may  
13  
14 399 be more so, compared to a neighboring one. Presence of different number of staffs causes  
15  
16 400 fluctuation in the amount of workload at different health facilities. In places where workload of a  
17  
18 401 staff category is 'Extremely High', some supports from nearby health facilities with lower  
19  
20 402 workload should be sought. Or, in places where workload of a staff category is 'Normal' or 'Low',  
21  
22 403 some support may be transferred to health facilities with higher workload. For example, in  
23  
24 404 Sreemangal UpHC, there are seven physicians, with a High workload pressure. However,  
25  
26 405 workload pressure in nearby Kulaura UpHC is Very High, with only four physicians (Table 5). At  
27  
28 406 least one physician from Sreemangal can be reallocated to Kulaura to tackle the high workload.  
29  
30  
31 407 Similar action may be taken regarding the Nurses by transferring some from Shailkupa  
32  
33 408 (Moderately High workload) to Kotchandpur (High workload). This is just an example how WISN  
34  
35 409 can help in decision-making regarding allocation of human resources. Similar situation was  
36  
37 410 identified in Namibia, where researchers suggested redistribution of health workers from one area  
38  
39 411 to the other<sup>23</sup>.  
40  
41  
42  
43  
44  
45  
46

47 412  
48  
49 413 We found that many posts remained vacant in different health facilities. Some staffs were not  
50  
51 414 present at their service locations for various reasons, such as training, deputation to another health  
52  
53 415 facility, etc. Even if the existing posts are filled-up, a large portion of the workload would be  
54  
55 416 curbed. For example, according to the Standard Setup document of the Ministry of Public  
56  
57  
58  
59  
60

1  
2  
3 417 Administration, 18 physician posts (10 Junior Consultants, one Residential Medical Officer, seven  
4  
5 418 Assistant Surgeons) have been proposed for a 50 bed hospital<sup>29</sup>. We have found 4.5 Physicians on  
6  
7 419 an average in each UpHC. The average required number is 11 (Table 3). Our proposition is that,  
8  
9 420 even if it is not possible to reach the ideal workforce setup for a health facility, filling-up at least  
10  
11 421 the vacant positions, and ensuring regular presence of all staffs would reduce the workload.  
12  
13 422 Supportive supervision and monitoring of the staff is essential to ensure the presence of posted  
14  
15 423 staff. Researchers in Namibia came up with the similar finding and proposed a similar solution for  
16  
17 424 the problem<sup>23</sup>. WISN was used over standard staffing schedule in HIV Clinics in Kenya as well to  
18  
19 425 resolve a similar crisis<sup>25</sup>.  
20  
21  
22  
23  
24 426

## 27 427 **Recommendations**

28  
29 428 Based on the findings and its in-depth analysis, we propose few short-term and long-term  
30  
31 429 recommendations. The short-term recommendations require administrative or management  
32  
33 430 decisions, relatively easier to implement and tackle the immediate crisis. On the other hand, the  
34  
35 431 long-term recommendations demand radical policy amendments following careful examination.  
36  
37  
38  
39 432

40  
41 433 Short-term recommendations include: reallocation of staff from low workload areas to high  
42  
43 434 workload areas, fill-up existing vacant positions and strengthen supervision and monitoring.  
44  
45 435 Nurses are the most needed staff, the most overloaded, and are short in supply. On top of all these,  
46  
47 436 they are burdened with support activities. If some of their support and additional activities can be  
48  
49 437 shifted to other staff, nurses can devote their time better in nursing care.  
50  
51  
52  
53 438



1  
2  
3 439 The study yields some long-term recommendations as well, for the policy-makers. For example,  
4  
5 440 in order to increase the availability of workforce, especially Nurses, and decrease their workload,  
6  
7 441 their number needs to increase. Hence, long term policy response is needed to increase the intake  
8  
9 442 of nursing students, train them with quality education, and deploy them in larger numbers in a  
10  
11 443 secure and gender-friendly work environment. In the same vein, incentives should be given to  
12  
13 444 increase the number of nurses in both public and private sector educational institutions.  
14  
15 445 Regulations should be developed and implemented so that medical colleges can be established  
16  
17 446 only when a nursing school is established alongside. Otherwise, the skill-mix imbalance between  
18  
19 447 physicians and nurses would jeopardize the quality of care. Quality and quantity of physicians  
20  
21 448 should also increase.

22  
23  
24  
25  
26 449 Secondly, since the Nurses are found to be predominantly engaged in support activities at the  
27  
28 450 expense of actual patient care, a separate staff category for administrative/ support activities is  
29  
30 451 greatly warranted. This will free up the valuable yet scarce clinical time of the service providers.

31  
32  
33 452 Thirdly, instead of the existing approach of deploying a fixed number of workforce at all health  
34  
35 453 facilities, a flexible recruitment and HRH planning is needed, based on patient load and disease  
36  
37 454 burden. This can be supported by determination of optimal requirements of HRH under given  
38  
39 455 limited resources or constrains in those health facilities by using the WHO methodology on  
40  
41 456 workload indicators of staffing need. It is important to recognize that, decisions in health sector  
42  
43 457 are very much contingent on the local context, especially the patient load, demographic drivers  
44  
45 458 (e.g., age structure of the population, gender ratio, etc.), and epidemiologic profile. Therefore, the  
46  
47 459 government should adopt flexible health workforce planning and recruitment policy in place to  
48  
49 460 keep up with the local patient load and disease burden. The culture of bottom-up decision-making  
50  
51 461 should be adopted eventually.  
52  
53  
54  
55  
56  
57  
58  
59  
60

1  
2  
3 462  
4  
5  
6

## 7 463 **Strengths and limitations**

8  
9 464 This study had a number of strengths. First, we conducted time-motion study, which helped the  
10  
11 465 research team gain a better understanding of the service context of the staffs. Secondly, when the  
12  
13 466 key informants or experts suggested an unrealistic activity standard, we presented them the time-  
14  
15 467 motion findings and helped them suggest a more context sensitive standards. Thirdly, the research  
16  
17 468 team used both qualitative and quantitative methods for primary data collection, which  
18  
19 469 complement each other for bringing data accuracy. Fourthly, WHO technical officers, who had  
20  
21 470 expertise in WISN application in other countries, and the Ministry of Health officials were directly  
22  
23 471 involved in the field level data quality checks.  
24  
25  
26

27 472  
28  
29

30 473 However, despite careful planning and painstaking implementation of the research, we faced some  
31  
32 474 challenges during different stages of the WISN process. First, some service statistics data, which  
33  
34 475 were essential for establishing standard workloads, were not readily available due to poor record  
35  
36 476 keeping systems at some health facilities. Secondly, the research did not take into account the  
37  
38 477 patients' opinion or stakeholders' stance. Notwithstanding the fact that these perspectives are  
39  
40 478 gaining momentum in health workforce decision-making, we could not take advantage of them in  
41  
42 479 the interest of adhering to the highly structured nature of the WISN methodology. Thirdly, the  
43  
44 480 official number of existing staffs often did not match with the number of staffs we observed  
45  
46 481 providing services.  
47  
48  
49

50 482  
51  
52

## 53 483 **Conclusions**

54  
55  
56  
57  
58  
59  
60

1  
2  
3 484 Human resource management is a big challenge, especially in a resource-poor setting like  
4  
5 485 Bangladesh. With a vision of becoming a middle-income country by 2021, Bangladesh needs to  
6  
7 486 strive for optimizing its existing resources, including human resources. This type of study can aid  
8  
9 487 the decision-making in this direction, using the WISN as a planning tool for the managers.  
10  
11 488 Implementation research is needed regarding how this workload-based staffing decisions can be  
12  
13 489 integrated into the health systems in the most effective way. We expect that, these types of studies  
14  
15 490 would pave the way for evidence-based HRH decision-making in the context of health system of  
16  
17 491 Bangladesh.  
18  
19  
20  
21  
22 492

### 23 24 493 **List of abbreviations**

25  
26  
27 494 ANC: Antenatal Care;  
28  
29 495 EMO: Emergency Medical Officer;  
30  
31 496 ERC: Ethical Review Committee;  
32  
33 497 ESP: Essential Services Package;  
34  
35 498 EWG: Expert Working Groups;  
36  
37 499 FDCs: Field Data Collectors;  
38  
39 500 FSs: Field Supervisors;  
40  
41 501 GoB: Government of Bangladesh;  
42  
43 502 HRH: Human Resources for Health;  
44  
45 503 IDI: In-depth Interviews;  
46  
47 504 IMCI: Integrated Management of Childhood Illness;  
48  
49 505 KII: Key Informant Interviews;  
50  
51 506 LMICs: Low- and Middle-Income Countries;  
52  
53  
54  
55  
56  
57  
58  
59  
60

1  
2  
3 507 MO: Medical Officer;  
4  
5 508 MoHFW: Ministry of Health and Family Welfare;  
6  
7 509 NCD: Non-communicable Diseases;  
8  
9  
10 510 OPD: Out Patient Department;  
11  
12 511 PNC: Postnatal Care;  
13  
14 512 RMO: Residential Medical Officer;  
15  
16 513 SC: Steering Committee;  
17  
18 514 TT: Technical Taskforce;  
19  
20 515 UHC: Universal Health Coverage;  
21  
22 516 UpHCs: Upazila Health Complexes;  
23  
24 517 WISN: Workload Indicators of Staffing Need  
25  
26  
27  
28  
29  
30  
31

## 32 **Declarations**

### 33 ***Consent for publication***

34  
35  
36 520  
37  
38  
39 521 During the data collection process, while the ethical consents were obtained from the respondents,  
40  
41 522 they were informed that their data might be used for publication in future. They were also informed  
42  
43 523 that their identity will remain anonymous. Institutional consents for publication were obtained as  
44  
45  
46 524 well.

### 47 ***Availability of data and materials***

48  
49  
50  
51 526 All research data have been submitted to the World Health Organization Country Office for  
52  
53 527 Bangladesh, as per the agreement with the research organization, BRAC James P Grant School of  
54  
55  
56 528 Public Health, BRAC University. This manuscript only used the data pertaining to the Physicians  
57

1  
2  
3 529 and Nurses working at the two study Upazila (sub-district) Health Complexes. Unpublished data  
4  
5 530 include: Consultants, General Physicians, and Nurses at the District Hospital level; Physicians,  
6  
7 531 and Family Welfare Visitors at Maternal and Child Welfare Center level; Sub-Assistant  
8  
9 532 Community Medical Officers at the Upazila Health Complex level; Sub-Assistant Community  
10  
11 533 Medical Officers at Union Sub-Centers level, Sub-Assistant Community Medical Officers, and  
12  
13 534 Family Welfare Visitors at Union Health and Family Welfare Centers level; and Community  
14  
15 535 Health Care Providers, and Family Welfare Assistants at the Community Clinic/ Outreach level.  
16  
17 536 Data may be obtained from the World Health Organization Country Office for Bangladesh upon  
18  
19 537 reasonable request (Focal Point: Mr. Md Nuruzzaman- nuruzzamanm@who.int).  
20  
21  
22  
23  
24 538

### 27 ***Competing interests***

28  
29  
30 540 The authors declared that they do not have any competing interests.  
31  
32  
33 541

### 35 ***Funding***

36  
37  
38 543 This study was funded by WHO Country Office, Bangladesh and conducted by a group of  
39  
40 544 researchers at BRAC James P Grant School of Public Health, BRAC University.  
41  
42  
43 545

### 45 ***Authors' contributions***

46  
47  
48 547 TJ conceived and designed the study. TJ and SNBKT carried out the data analyses and drafted the  
49  
50 548 manuscript. MN, SA, VOC, and TZ thoroughly reviewed the manuscript and contributed  
51  
52 549 substantially with necessary revision. TJ and SNBKT again reviewed the manuscript and prepared  
53  
54 550 for final submission. All authors approved the final manuscript.  
55  
56  
57  
58  
59  
60

1  
2  
3  
4 5515  
6  
7 552 ***Acknowledgements***

8  
9 553 BRAC James P Grant School of Public Health, BRAC University acknowledges with gratitude to  
10  
11 554 WHO Country Office, Bangladesh for its contribution in this research effort and MoHFW for  
12  
13  
14 555 supporting the research team throughout the study period. We are also thankful to the study  
15  
16 556 participants who consented to participate in the study. We are indebted to Professor. Dr. Sayed  
17  
18 557 Masud Ahmed, who served as the Advisor to the study project, and provided valuable technical  
19  
20  
21 558 inputs at different stages of the project. Finally, we would like to extend our sincere gratitude to  
22  
23 559 the Field Supervisors and Data Collectors for their contribution throughout the qualitative and  
24  
25 560 quantitative data collection.

26  
27  
28 561

29  
30 562 **Patient and Public Involvement statement:** No patient involved

31  
32  
33 56334  
35 564 **References**

- 36  
37  
38 5651. International Labor Organization. Global Extension of Social Security. Geneva; 2013.  
39  
40 5662. World Health Organization. Global strategy on human resources for health: workforce 2030.  
41  
42 567 Geneva; 2016.
- 43  
44 5683. WHO South East Asia Regional Office. Decade for health workforce strengthening in the South-  
45  
46  
47 569 East Asia Region 2015-2024, second review of progress; New Delhi; 2018  
48  
49 570 [http://apps.searo.who.int/PDS\\_DOCS/B5439.pdf](http://apps.searo.who.int/PDS_DOCS/B5439.pdf)
- 50  
51 5714. Lerberghe WV, Conceic CC, Damme WV, and Ferrinho P. When staff is underpaid : dealing with  
52  
53  
54 572 the individual coping strategies of health personnel. 2002; 80 (01): p. 581–584.

- 1  
2  
3 573 <https://www.ncbi.nlm.nih.gov/pmc/articles/PMC2567566/pdf/12163923.pdf>.
- 4  
5 5745. Rowe AK, De Savigny D, Lanata CF, Victora CG. How can we achieve and maintain high-quality  
6  
7 performance of health workers in low-resource settings?. *The Lancet*. 2005 Sep 17;366:  
8 575 9490.p.1026-35. [https://www.thelancet.com/journals/lancet/article/PIIS0140-6736\(05\)67028-](https://www.thelancet.com/journals/lancet/article/PIIS0140-6736(05)67028-6/fulltext?code=lancet-site)  
9  
10 576 6/fulltext?code=lancet-site.  
11  
12 577  
13  
14 5786. World Health Organization. The world health report: working together for health. Geneva: World  
15  
16 Health Organization; 2006.  
17  
18 5807. Henderson LN, Tulloch J. Incentives for retaining and motivating health workers in Pacific and  
19  
20 Asian countries. *Human resources for health*. 2008 Dec;6(1):18. doi: 10.1186/1478-4491-6-18.  
21  
22 581  
23 5828. Ahmed SM, Evans TG, Standing H, Mahmud S. Harnessing pluralism for better health in  
24  
25 Bangladesh. *The Lancet*. 2013 Nov 23;382(9906):1746-55.doi: 10.1016/S0140-6736(13)62147-9.  
26  
27 583  
28 5849. Ahmed SM, Alam BB, Anwar A, Begum T, Haque R, AM Khan J and et al. Bangladesh Health  
29  
30 System Review. Edited by A. Naheed and K. Hort. Dhaka: World Health Organization; 2015  
31  
32 585  
33 58610. Cometto G, Witter S. Tackling health workforce challenges to universal health coverage: setting  
34  
35 587 targets and measuring progress. *Bulletin of the World Health Organization*. 2013;91:881-5. doi:  
36  
37 588 10.2471/BLT.13.118810.  
38  
39 58911. Government of Bangladesh (2015) Bangladesh Health Workforce Strategy 2015. Dhaka.  
40  
41 59012. Darkwa EK, Newman MS, Kawkab M, Chowdhury ME. A qualitative study of factors influencing  
42  
43 591 retention of doctors and nurses at rural healthcare facilities in Bangladesh. *BMC health services*  
44  
45 592 *research*. 2015 Dec;15(1):344. doi: 10.1186/s12913-015-1012-z.  
46  
47 59313. Rawal LB, Joarder T, Islam SM, Uddin A, Ahmed SM. Developing effective policy strategies to  
48  
49 594 retain health workers in rural Bangladesh: a policy analysis. *Human resources for health*. 2015  
50  
51 595 Dec;13(1):36. Available at: <http://www.coe-uhc.org/index.php/publications/category/9-working->  
52  
53  
54  
55  
56  
57  
58  
59  
60

1  
2  
3 596 paper-series.  
4

5 59714. deVaron Reynolds J, Costello T, Edwards MT. The study of workload in child protective and child  
6  
7  
8 598 welfare services. *Time and Effort: Perspectives on Workload Roundtable*. 2008 Dec 3. Available  
9  
10 599 at:  
11  
12 600 [https://www.researchgate.net/profile/Robin\\_Perry3/publication/237430886\\_A\\_Critical\\_Appraisal](https://www.researchgate.net/profile/Robin_Perry3/publication/237430886_A_Critical_Appraisal_of_What_Child_Welfare_Workers_Do_Findings_From_a_Task_Analysis_Study_in_Florida/links/54662f200cf25b85d17f5b5b.pdf#page=4)  
13  
14 601 [l\\_of\\_What\\_Child\\_Welfare\\_Workers\\_Do\\_Findings\\_From\\_a\\_Task\\_Analysis\\_Study\\_in\\_Florida/li](https://www.researchgate.net/profile/Robin_Perry3/publication/237430886_A_Critical_Appraisal_of_What_Child_Welfare_Workers_Do_Findings_From_a_Task_Analysis_Study_in_Florida/links/54662f200cf25b85d17f5b5b.pdf#page=4)  
15  
16 602 [nks/54662f200cf25b85d17f5b5b.pdf#page=4](https://www.researchgate.net/profile/Robin_Perry3/publication/237430886_A_Critical_Appraisal_of_What_Child_Welfare_Workers_Do_Findings_From_a_Task_Analysis_Study_in_Florida/links/54662f200cf25b85d17f5b5b.pdf#page=4).  
17  
18

19 60315. World Health Organization. *Global strategy on human resources for health: workforce 2030*. 2016.  
20  
21 604 Available at: <http://apps.who.int/iris/bitstream/10665/250368/1/9789241511131-eng.pdf?ua=1>.  
22  
23

24 60516. World Health Organization (2010) *Workload Indicators of Staffing Need: User's Manual*. Geneva:  
25  
26 606 World Health Organization.  
27  
28 607 World Health Organization. *Workload indicators of staffing need: User's manual*. Geneva: World  
29  
30  
31 608 Health Organization. 2010.  
32

33 60917. Lopetegui M, Yen PY, Lai A, Jeffries J, Embi P, Payne P. Time motion studies in healthcare: what  
34  
35 610 are we talking about?. *Journal of biomedical informatics*. 2014 Jun 1;49:292-9. doi:  
36  
37 611 10.1016/j.jbi.2014.02.017.  
38  
39

40 61218. Government of Bangladesh. *Health Bulletin*. Dhaka. 2016a.  
41

42 61319. Ritchie J, Lewis J, Nicholls CM, Ormston R, editors. *Qualitative research practice: A guide for*  
43  
44 614 *social science students and researchers*. sage; 2013 Nov 1.  
45  
46

47 61520. Government of Bangladesh. *Bangladesh Essential Health Service Package (ESP)*. Dhaka. 2016b.  
48

49 61621. Ahmed SM, Hossain MA, RajaChowdhury AM, Bhuiya AU. The health workforce crisis in  
50  
51 617 Bangladesh: shortage, inappropriate skill-mix and inequitable distribution. *Human resources for*  
52  
53 618 *health*. 2011 Dec;9(1):3. Available at: <http://www.human-resources-health.com/content/9/1/3>.  
54  
55  
56  
57



- 1  
2  
3 61922. Greenglass ER, Burke RJ, Moore KA. Reactions to increased workload: Effects on professional  
4  
5 620 efficacy of nurses. *Applied psychology*. 2003 Oct;52(4):580-97. doi: 10.1111/1464-0597.00152.  
6  
7  
8 62123. McQuide PA, Kolehmainen-Aitken RL, Forster N. Applying the workload indicators of staffing  
9  
10 622 need (WISN) method in Namibia: challenges and implications for human resources for health  
11  
12 623 policy. *Human resources for health*. 2013 Dec;11(1):64. doi: 10.1186/1478-4491-11-64.  
13  
14  
15 62424. Namaganda G, Oketcho V, Maniple E, Viadro C. Making the transition to workload-based  
16  
17 625 staffing: using the Workload Indicators of Staffing Need method in Uganda. *Human resources for*  
18  
19 626 *health*. 2015 Dec;13(1):89.. doi: 10.1186/s12960-015-0066-7.  
20  
21  
22 62725. Burmen B, Owuor N, Mitei P. An assessment of staffing needs at a HIV clinic in a Western Kenya  
23  
24 628 using the WHO workload indicators of staffing need WISN, 2011. *Human resources for health*.  
25  
26 629 2017 Dec;15(1):9. doi: 10.1186/s12960-017-0186-3.  
27  
28  
29 63026. Ly A, Kouanda S, Ridde V. Nursing and midwife staffing needs in maternity wards in Burkina  
30  
31 631 Faso referral hospitals. *Human resources for Health*. 2014 May;12(1):S8. doi: 10.1186/1478-  
32  
33 632 4491-12-S1-S8.  
34  
35  
36 63327. Nayebi BA, Mohebbifar R, Azimian J, Rafiei S. Estimating nursing staff requirement in an  
37  
38 634 emergency department of a general training hospital: Application of Workload Indicators of  
39  
40 635 Staffing Need (WISN). *International Journal of Healthcare Management*. 2017 Oct 17:1-6. doi:  
41  
42 636 10.1080/20479700.2017.1390182.  
43  
44  
45 63728. Zaman S. Ladies without lamps: nurses in Bangladesh. *Qualitative Health Research*. 2009  
46  
47 638 Mar;19(3):366-74. doi: 10.1177/1049732309331876.  
48  
49  
50 63929. Ministry of Public Administration. 'Standard setup by the government for human resources in 10,  
51  
52 640 20, 31, 50, 100, 150, 200, 250, 500, 500 bed general hospitals at Union, Upazila, District, and  
53  
54 641 Division levels, under Ministry of Health and Family Welfare'. Bangladesh. 2008.  
55  
56  
57  
58  
59  
60

1  
2  
3  
4 642 **Figure Legends**  
5

6 643 Figure 1: The ways WISN can help in human resource decision-making  
7

8 644 Figure 2: Methods applied in each WISN step  
9

10 645 Figure 3: Map of Jhenaidah and Moulvibazar Districts with study Upazilas identified  
11

12 646 Figure 4: Approach of integration of ESP components in defining workload components of  
13 647 health service activity  
14

15 648  
16  
17  
18  
19  
20  
21  
22  
23  
24  
25  
26  
27  
28  
29  
30  
31  
32  
33  
34  
35  
36  
37  
38  
39  
40  
41  
42  
43  
44  
45  
46  
47  
48  
49  
50  
51  
52  
53  
54  
55  
56  
57  
58  
59  
60

For peer review only

## Figure 1

Comparative analysis of WISN Ratio across different geographical areas (and health facilities therein)

- can help decision-making on recruitment of new staff and transfer of existing staff

Comparative analysis of WISN Ratio across comparable staff categories

- can help decision-making on allocating new functions on certain staff categories or removing their functions to other staff

Comparative analysis of current professional standards with the activity standards (developed for the WISN study)

- can help evaluating current professional performance and decision-making on additional staff requirement for performance improvement

Analysis of projected workload

- can help decision-making on future staffing of health facilities

Alternative scenario based WISN analysis (e.g., changing length of working week, changing leave days, changing training policies, etc.)

- can help examining the impact of different conditions on staff requirement

### Figure 1. The ways WISN can help in human resource decision-making

The ways WISN can help in human resource decision-making

**Figure 2**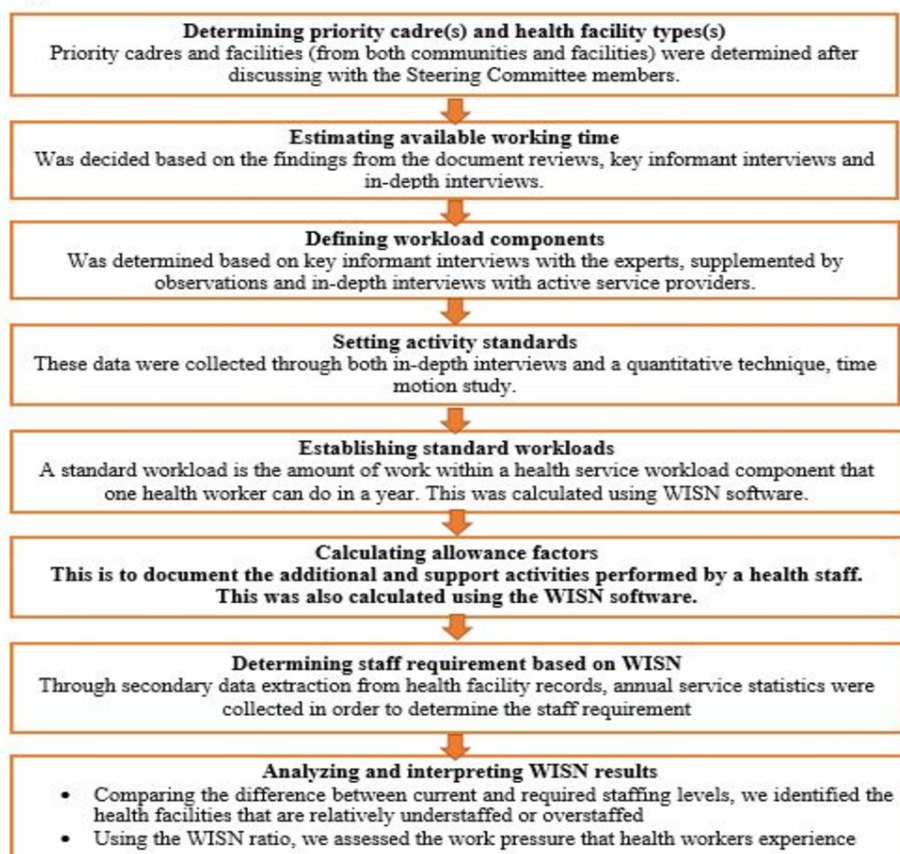**Figure 2 Methods applied in each WISN step**

Methods applied in each WISN step

1  
2  
3  
4  
5  
6  
7  
8  
9  
10  
11  
12  
13  
14  
15  
16  
17  
18  
19  
20  
21  
22  
23  
24  
25  
26  
27  
28  
29  
30  
31  
32  
33  
34  
35  
36  
37  
38  
39  
40  
41  
42  
43  
44  
45  
46  
47  
48  
49  
50  
51  
52  
53  
54  
55  
56  
57  
58  
59  
60

Figure 3

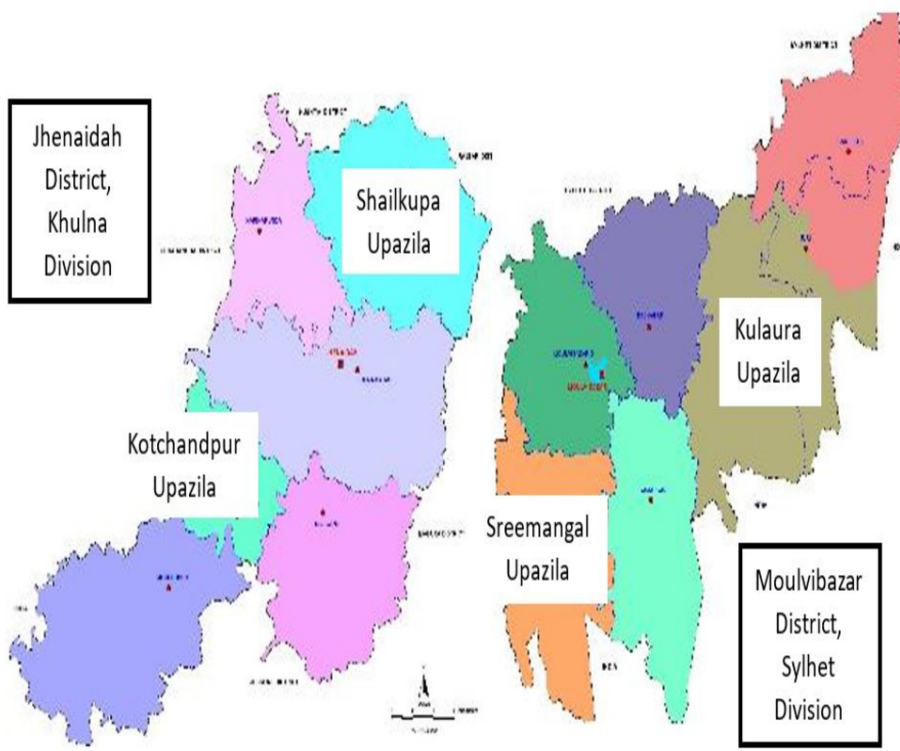

Figure 3 Map of Jhenaidah and Moulvibazar Districts with study Upazilas identified

Map of Jhenaidah and Moulvibazar Districts with study Upazilas identified

Figure 4

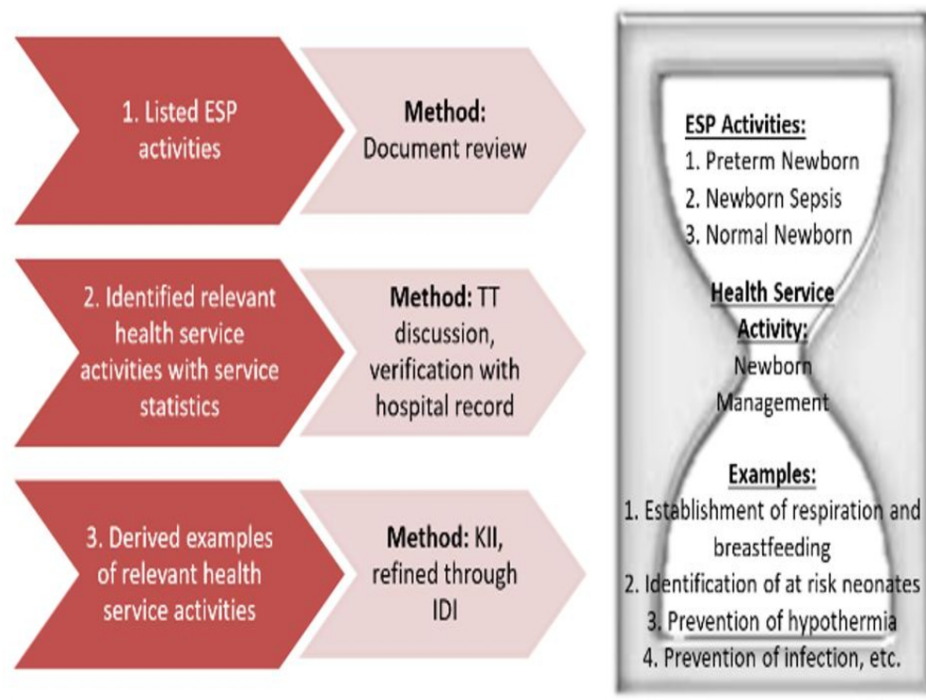

**Figure 4 Approach of integration of ESP components in defining workload components of health service activity**

Approach of integration of ESP components in defining workload components of health service activity

# BMJ Open

## An assessment of staffing needs for physicians and nurses at Upazila Health Complexes in Bangladesh using WHO workload indicators of staffing need (WISN) method

|                                 |                                                                                                                                                                                                                                                                                                                                                                                                                                                                              |
|---------------------------------|------------------------------------------------------------------------------------------------------------------------------------------------------------------------------------------------------------------------------------------------------------------------------------------------------------------------------------------------------------------------------------------------------------------------------------------------------------------------------|
| Journal:                        | <i>BMJ Open</i>                                                                                                                                                                                                                                                                                                                                                                                                                                                              |
| Manuscript ID                   | bmjopen-2019-035183.R2                                                                                                                                                                                                                                                                                                                                                                                                                                                       |
| Article Type:                   | Original research                                                                                                                                                                                                                                                                                                                                                                                                                                                            |
| Date Submitted by the Author:   | 09-Jan-2020                                                                                                                                                                                                                                                                                                                                                                                                                                                                  |
| Complete List of Authors:       | Joarder, Taufique; BRAC University, BRAC James P Grant School of Public Health; FHI 360, Bangladesh Office<br>Tune, Samiun; BRAC James P Grant School of Public Health, BRAC University, Public Health;<br>Nuruzzaman, Md; World Health Organization Bangladesh<br>Alam, Sabina; Government of Bangladesh Ministry of Health and Family Welfare, Health Services Division<br>Cruz, Valeria; World Health Organization, Country Office for Bangladesh<br>Zapata, Tomas; SEARO |
| <b>Primary Subject Heading</b>: | Health services research                                                                                                                                                                                                                                                                                                                                                                                                                                                     |
| Secondary Subject Heading:      | Health policy, Global health, Nursing, Public health                                                                                                                                                                                                                                                                                                                                                                                                                         |
| Keywords:                       | Health policy < HEALTH SERVICES ADMINISTRATION & MANAGEMENT, PUBLIC HEALTH, HEALTH SERVICES ADMINISTRATION & MANAGEMENT, Human resource management < HEALTH SERVICES ADMINISTRATION & MANAGEMENT                                                                                                                                                                                                                                                                             |
|                                 |                                                                                                                                                                                                                                                                                                                                                                                                                                                                              |

SCHOLARONE™  
Manuscripts





I, the Submitting Author has the right to grant and does grant on behalf of all authors of the Work (as defined in the below author licence), an exclusive licence and/or a non-exclusive licence for contributions from authors who are: i) UK Crown employees; ii) where BMJ has agreed a CC-BY licence shall apply, and/or iii) in accordance with the terms applicable for US Federal Government officers or employees acting as part of their official duties; on a worldwide, perpetual, irrevocable, royalty-free basis to BMJ Publishing Group Ltd ("BMJ") its licensees and where the relevant Journal is co-owned by BMJ to the co-owners of the Journal, to publish the Work in this journal and any other BMJ products and to exploit all rights, as set out in our [licence](#).

The Submitting Author accepts and understands that any supply made under these terms is made by BMJ to the Submitting Author unless you are acting as an employee on behalf of your employer or a postgraduate student of an affiliated institution which is paying any applicable article publishing charge ("APC") for Open Access articles. Where the Submitting Author wishes to make the Work available on an Open Access basis (and intends to pay the relevant APC), the terms of reuse of such Open Access shall be governed by a Creative Commons licence – details of these licences and which [Creative Commons](#) licence will apply to this Work are set out in our licence referred to above.

Other than as permitted in any relevant BMJ Author's Self Archiving Policies, I confirm this Work has not been accepted for publication elsewhere, is not being considered for publication elsewhere and does not duplicate material already published. I confirm all authors consent to publication of this Work and authorise the granting of this licence.



1  
2  
3  
4  
5  
6  
7  
8  
9  
10  
11  
12  
13  
14  
15  
16  
17  
18  
19  
20  
21  
22  
23  
24  
25  
26  
27  
28  
29  
30  
31  
32  
33  
34  
35  
36  
37  
38  
39  
40  
41  
42  
43  
44  
45  
46  
47  
48  
49  
50  
51  
52  
53  
54  
55  
56  
57  
58  
59  
60

1 **\*\*Title page**

2 **An assessment of staffing needs for physicians and nurses at Upazila Health**  
3 **Complexes in Bangladesh using WHO workload indicators of staffing need**  
4 **(WISN) method**

5 Taufique Joarder<sup>1, 2\*</sup>, Samiun Nazrin Bente Kamal Tune<sup>1</sup>, Md Nuruzzaman<sup>3</sup>, Sabina Alam<sup>4</sup>,  
6 Valeria de Oliveira Cruz<sup>5</sup>, Tomas Zapata<sup>5</sup>

7  
8 <sup>1</sup>BRAC James P Grant School of Public Health, BRAC University, Dhaka

9 <sup>2</sup>FHI360, Dhaka, Bangladesh

10 <sup>3</sup>World Health Organization Country Office for Bangladesh, Dhaka

11 <sup>4</sup>Health Services Division, Ministry of Health and Family Welfare, Government of Bangladesh

12 <sup>5</sup>World Health Organization South-East Asia Regional Office, New Delhi

13  
14 Email addresses:

15 TJ: [taufiquejoarder@gmail.com](mailto:taufiquejoarder@gmail.com)

16 SNBKT: [samiun.tune@gmail.com](mailto:samiun.tune@gmail.com)

17 MN: [nuruzzamanm@who.int](mailto:nuruzzamanm@who.int)

18 SA: [alam6350@gmail.com](mailto:alam6350@gmail.com)

19 VOC: [deoliveiracruzv@who.int](mailto:deoliveiracruzv@who.int)

20 TZ: [zapatat@who.int](mailto:zapatat@who.int)

21  
22 \*Corresponding author

## 23 **Abstract**

24 **Objective** This study aimed to assess the current workload and staffing need of Physicians and  
25 Nurses for delivering optimum health care services at the Upazila Health Complexes (UpHCs) in  
26 Bangladesh.

27 **Design** Mixed-methods, combining qualitative (e.g., document reviews, key informant interviews,  
28 in-depth interviews, observations) and quantitative methods (time-motion survey)

29 **Setting** Study was conducted in 24 health facilities of Bangladesh. However, UpHCs being the  
30 nucleus of primary health care in Bangladesh, this manuscript limits itself to reporting the findings  
31 from the providers at four UpHCs under this project.

32 **Participants** 18 Physicians and 51 Nurses, males and females.

33 **Primary outcome measures** Workload components were defined based on inputs from five  
34 experts, refined by nine service providers. Using WHO WISN software, standard workload,  
35 category allowance factor, individual allowance factor, total required number of staff, WISN  
36 Difference, and WISN Ratio were calculated.

37 **Results:** Physicians have Very High (WISN Ratio 0.43) and Nurse High (WISN Ratio 0.69)  
38 workload pressure. 50% of Nurses' time are occupied with support activities, instead of nursing  
39 care. There are different workloads among the same staff category in different health facilities. If  
40 only the vacant posts are filled, the workload is reduced. In fact, sanctioned number of Physicians  
41 and Nurses is more than actual need.

42 **Conclusions:** It is evident that high workload pressures prevail for Physicians and Nurses at the  
43 UpHCs. This reveals high demand for these health workforces in the respective sub-districts.  
44 WISN method can aid the policy-makers in optimizing utilization of existing human resources.  
45 Therefore, the government should adopt flexible health workforce planning and recruitment policy

1  
2  
3 46 to manage the patient load and disease burden. WISN should thus be incorporated as a planning  
4  
5 47 tool for health managers. There should be a regular review of health workforce management  
6  
7 48 decisions, and these should be amended based on periodic reviews.  
8  
9  
10  
11 49

## 12 13 50 **Strengths and limitations**

- 15 51 • Time-motion findings helped the experts suggest a more context sensitive activity  
16  
17 52 standards.
- 18  
19  
20 53 • Using both qualitative and quantitative methods for primary data collection complemented  
21  
22 54 each other for bringing data accuracy.
- 23  
24  
25 55 • Technical inputs from the WHO technical experts in WISN application in other countries,  
26  
27 56 and officials of the Ministry of Health improved the data quality as they were directly  
28  
29 57 involved in quality checks at the field level.
- 30  
31  
32 58 • One limitation was that some service statistics data, essential for establishing standard  
33  
34 59 workloads, were unavailable.
- 35  
36 60 • Due to lack of scope in WISN methodology, patient engagement was minimal.
- 37  
38

## 39 61 **Keywords**

40  
41  
42 62 Human Resources for Health, Workforce Management, Workload Indicators of Staffing Need,  
43  
44 63 Bangladesh, Upazila Health Complex, Health Systems  
45  
46  
47 64

## 65 **Background**

66 Shortage of Human Resources for Health (HRH) has been one of the major challenges faced by the  
67 health system and globally, more than 90 countries are haunted by this crisis. According to  
68 International Labor Organization (ILO), there are on average 34.5 health workers per 10,000  
69 population and about one third of the world's population lack access to health care because of  
70 shortage of health workforce<sup>1</sup>. According to the Global strategy on human resources for health:  
71 workforce 2030, the estimated global shortage of skilled health workers will be around 18 million  
72 by 2030<sup>2</sup>. This problem has reached a critical stage in three (Bangladesh, Myanmar and Bhutan)  
73 South-East Asia Region countries with <23 health workers (doctors, nurses and midwives)  
74 per 10,000 population, limiting access to health services<sup>3</sup>.

76 Improving health workers' performance and productivity is vital for better health service provision  
77 in the country. Poor performance of the health workers has been reported in the literature resulting  
78 from too few staff, or staff not providing care according to standards<sup>4-6</sup>. The extent of the shortage  
79 is reflected in health worker density rates and workforce vacancy rates, and its impact in health  
80 system performance indicators. Factors that contribute to poor performance of health workers  
81 include limited employment opportunities and low salaries; poor working conditions, weak  
82 support and supervision, and limited opportunities for professional development<sup>7</sup>.

84 Bangladesh's health workforce scenario is characterized by "shortage, inappropriate skill mix and  
85 inequitable distribution"<sup>8,9</sup>. Equitable access to skilled and motivated health worker in a functional  
86 health system is essential for achieving Universal Health Coverage (UHC) and the Sustainable  
87 Development Goals<sup>10</sup>. In 2015, Government of Bangladesh (GoB) approved the Bangladesh

1  
2  
3 88 Health Workforce Strategy which affirms government's vision of equitable availability of skilled,  
4  
5 89 motivated and responsive health workforce in adequate numbers across the country<sup>11</sup>. However,  
6  
7 90 there is lack of comprehensive, nationally representative data on HRH workload and optimum staff  
8  
9 91 need in health care facilities in Bangladesh. A small scale qualitative study found overwhelming  
10  
11 92 workload as one of the critical components that hinders retention of doctors and nurses at rural  
12  
13 93 healthcare facilities in Bangladesh<sup>12</sup>. Another policy analysis on retention of HRH (physicians and  
14  
15 94 nurses) also found that deficiency of adequate workforce and consequent high workload acted as  
16  
17 95 a deterrent against rural retention<sup>13</sup>.

18  
19  
20  
21 96  
22  
23  
24 97 Workload management is very important for any country or institution to deliver quality services,  
25  
26 98 retain staffs and reduce turnover<sup>14</sup>. Even the seminal document on HRH, "Global strategy on  
27  
28 99 human resources for health: Workforce 2030", emphasized on developing country level workforce  
29  
30 100 strategies, drawing on workload analysis studies<sup>2</sup>. Such studies can provide detailed insight into  
31  
32 101 the current state of workload in a system, coping strategies of the staff for regular extra work  
33  
34 102 pressure, causes behind the excessive workloads, and ways to deal with it. This study aimed to fill-  
35  
36 103 in this knowledge gap with respect to workload and optimum staff need for physicians and nurses  
37  
38 104 at the Upazila or Sub-district level (i.e., at Upazila Health Complex [UpHC]). It is expected that  
39  
40 105 this workload analysis will contribute in improving performance, ensuring quality of services, and  
41  
42 106 facilitating uninterrupted service delivery through efficient management of staff.  
43  
44  
45  
46

47 107  
48  
49

## 50 108 **Workload Indicator of Staffing Need (WISN) overview**

51  
52  
53 109 WHO developed the Workload Indicator of Staffing Need (WISN) method in 1998, which was  
54  
55 110 later updated based on learning from implementation in different countries. This method is simple,  
56  
57

1  
2  
3 111 useful and time-saving, which was borrowed from the industrial sector for use in the health sector  
4  
5 112 by Peter Shipp in 1984. The result is expressed in terms of differences and ratios, the former  
6  
7 113 indicating worker shortage or surplus, and the latter workload pressure experienced by the staff<sup>15</sup>.  
8  
9  
10 114  
11  
12 115 WISN results help in human resource decision-making in several ways (Figure 1). For example,  
13  
14 116 recruitment and transfer of HRH can be based on geographic comparison of WISN ratios, staffing  
15  
16 117 of health facilities can be informed by WISN-based workload projection, etc.

## 19 118 **Methods**

### 23 119 **Study design**

25 120 We followed the updated WISN manual<sup>15</sup>, but contextualized it for Bangladeshi setting. The WISN  
26  
27 121 steps have been summarized in Figure 2. The research project was developed based on close  
28  
29 122 collaboration among and mutual insights from three types of committees:

- 32 123 1. **Steering Committee (SC):** The SC was consisting 13 members, established by the Ministry  
34  
35 124 of Health and Family Welfare (MOHFW) with membership from senior government officials  
36  
37 125 (seven): WHO official (one); professional organization of the physicians, Bangladesh Medical  
38  
39 126 Association (one); and relevant academia (four) such as BRAC University (two persons),  
40  
41 127 Bangladesh University of Health Sciences, and Center for Medical Education. All seven senior  
42  
43 128 government officials were directly involved in decision making regarding daily management  
44  
45 129 of the health workforce in their respective departments. WHO officer was there to respond to  
46  
47 130 WISN related technical issues and application. All four academicians were part of the  
48  
49 131 committee because they had expertise in their respective areas (i.e. education, policy making,  
50  
51 132 curriculum development and performance assessment) of the health workforce. They were also  
52  
53  
54  
55  
56  
57  
58  
59  
60

1  
2  
3 133 well known in the community of scientific writing and academic teaching. The role of the SC  
4  
5 134 was to guide and endorse the overall study based on the WISN strategy and its implementation.  
6  
7

8 135 2. **Technical Taskforce (TT):** TT was responsible for guiding the implementation of the WISN  
9  
10 136 process. Researchers from implementing research institution (the school of public health of a  
11  
12 137 Bangladeshi university, BRAC University); and experts from WHO Bangladesh Country  
13  
14 138 Office; an international non-governmental organization (NGO), Save the Children; and  
15  
16 139 another university, Bangladesh University of Health Sciences served in the Taskforce.  
17  
18

19 140 3. **Expert Working Groups (EWG):** There were multiple EWGs, one for each of the following  
20  
21 141 professional groups: General Physicians (Medical Officer [MO], Emergency Medical Officer  
22  
23 142 [EMO], Residential Medical Officer [RMO]), and Nursing Staff (Senior Staff Nurse, Nursing  
24  
25 143 Supervisor). The respective EWG defined the workload components and set activity standard  
26  
27 144 for the specific staff category.  
28  
29

30  
31 145 The qualitative part of this research involved document reviews, key informant interviews (KII)  
32  
33 146 with policy level persons related to HRH issues in Bangladesh (mostly from among SC and EWG  
34  
35 147 members), in-depth interviews (IDI) with individual service providers (e.g., physicians, nurses,  
36  
37 148 etc. working in UpHCs under this study), and observations. The quantitative component involved  
38  
39 149 time-motion survey which is a work measurement technique for recording the times and rates of  
40  
41 150 working for the elements of a specific job though observing a subject continuously or in a certain  
42  
43 151 period of time<sup>16</sup>. Time motion data served as a guide to determine the activity standard for WISN  
44  
45 152 analyses.  
46  
47  
48  
49

50 153  
51  
52  
53  
54  
55  
56  
57  
58  
59  
60

## 154 **Study duration, setting and population**

155 The research continued from July to November 2017 and was carried out in two pre-selected  
156 Districts of Bangladesh (Figure 3):

- 157 • Jhenaidah, located in south-western part of Bangladesh, under Khulna Division
- 158 • Moulvibazar, located in north-eastern part of Bangladesh, under Sylhet Division

159  
160 The selection of the districts was made by the Human Resources Unit, Ministry of Health and  
161 Family Welfare **in collaboration with the development partners (Save the Children and WHO**  
162 **Bangladesh) in a workshop nationally organized in November 2016. Later the selection of**  
163 **the UpHCs was made in consultation with the SC, taking into consideration some**  
164 **performance indicators such as** number of beds, number of total deliveries, number of live births,  
165 bed occupancy rates as well as patient load including the number of outpatient visits. **From each**  
166 **district, two highest performing UpHCs were included in the study**<sup>17</sup>. Thus, Shailkupa and  
167 Kotchandpur UpHCs were selected from Jhenaidah District and Kulaura and Sreemangal from the  
168 Moulvibazar. Because future applications need to be based on optimum quality standards, the  
169 highest performing UpHCs were selected to serve as a model for other health facilities. From each  
170 of these four UpHCs, physicians (Medical Officers and Residential Medical Officers) and nurses  
171 (Senior Staff Nurse and Nursing Supervisor) were included for workload analysis. A total of 24  
172 health facilities from the two districts were studied. This included two district hospitals, four  
173 UpHCs, two Maternal and Child Welfare Centers, eight Union Sub Centers, eight Union Health  
174 and Family Welfare Centers, and eight Community Clinics. This manuscript reported findings  
175 from all the four UpHCs under this study, as UpHCs are the nucleus of the primary health care  
176 delivery in Bangladesh, serving the rural population.



1  
2  
3 177  
4  
56 178 **Sampling strategy**7  
8  
9 179 **Qualitative part**

10 180 Documents for review were selected based on the suggestions from the experts (members of SC,  
11  
12 181 TT, and EWG), supplemented by reference tracking of government reports and published literature  
13  
14 182 on HRH of Bangladesh. Key Informants were selected on the principles of purposive sampling<sup>18</sup>,  
15  
16 183 supplemented by snowball sampling (i.e., based on the reference or suggestion from the key  
17  
18 184 informants). IDI respondents were selected through purposive sampling, based on the respondent's  
19  
20 185 seniority and designation (e.g., Residential Medical Officer, Nursing Supervisors, etc.). These  
21  
22 186 respondents were practicing individuals and had more than 10 years of experience and played a  
23  
24 187 supervisory role in their respective health facilities.  
25  
26  
27  
28  
29

30 188

31  
32  
33 189 **Quantitative part**

34 190 For time-motion study, time sampling was done for each consenting staff available during the data  
35  
36 191 collection period. Field Data Collectors (FDCs) observed each staff twice for 45-minutes duration,  
37  
38 192 once during the first half of their service duration and again during the second half. This was done  
39  
40 193 to minimize the bias in the time data due to the patient load (assuming higher patient load in the  
41  
42 194 first half and lower in the second).  
43  
44  
45  
46  
47

48 195  
49  
50  
51  
52  
53  
54  
55  
56  
57  
58  
59  
60

## 196 **Tool development, pretest, training of data collectors, agreement test**

197 For qualitative data collection, semi-structured guidelines, including that for document reviews,  
198 KIIs, IDIs, and observation, were developed. For the time-motion study, structured observation  
199 tool was designed. The structured observation tools contained three sections:

- 200 1. Background information of observation setting and the person under observation
- 201 2. Time-motion data sheet (containing three columns: type of activity, time spent in minutes,  
202 and remarks)
- 203 3. Example of the activities (health service activities, support activities, and additional  
204 activities)

205  
206 Health service activities, according to WISN manual, are performed by all members of the staff  
207 category and regular service statistics are available for them for example, obstetrical service,  
208 emergency service, outpatient service, etc. Support activities are also performed by all members  
209 of the staff category, but regular service statistics are not available for them for example, record  
210 keeping and reporting, attending meetings, instrument sterilization, etc. Additional activities are  
211 performed by only certain members of the staff category (e.g., the supervisor or a senior member),  
212 and regular service statistics are not available for them for example, duty roster preparation,  
213 preparing staff evaluation reports, supervision of cleanliness, etc.<sup>15</sup>.

214  
215 The examples of health service activities were primarily drawn from the list of the activities  
216 mentioned in the Essential Services Package (ESP)<sup>19</sup> for respective health facility type. Since  
217 service statistics were not available according the ESP activity list, it was adjusted for the local  
218 context with inputs from the respondents (through KII, followed by IDI), in alignment with the

1  
2  
3 219 availability of service statistics. An ‘hourglass’ approach was adopted for defining the workload  
4  
5 220 components based on the ESP (Figure 4). Tools were pre-tested in a UpHC near Dhaka, before  
6  
7 221 applying for actual data collection. Qualitative tools were also pre-tested through mock IDIs and  
8  
9 222 KIIs. The pre-testing exercise was followed by the training of the Field Supervisors (FSs) and  
10  
11 223 Field Data Collectors (FDCs).  
12  
13  
14  
15 224

### 18 225 **Data collection and quality control**

19  
20  
21 226 At first, FSs were sent to respective districts to orient the personnel on the project, seek support,  
22  
23 227 and assess the availability of the service statistics. The FSs spent one week in each district and  
24  
25 228 conducted qualitative observation of the service provision at the UpHCs, to gain a firsthand  
26  
27 229 understanding of the context.  
28  
29

30 230  
31  
32 231 In the second step, we conducted five KIIs to define workload components, in light of the ESP  
33  
34 232 document’s standard of services by facility level<sup>19</sup>. The workload components were further refined  
35  
36 233 based on IDIs with a total of eight physicians and eight nurses.  
37  
38

39 234  
40  
41 235 In the third step, the FDCs, under the supervision of FSs, conducted time-motion study, using a  
42  
43 236 mobile device (SurveyCTO software). During the time FDCs were collecting time-motion data,  
44  
45 237 the FS, in addition to supervising the FDCs, conducted additional IDIs and collected data on  
46  
47 238 available working time; time required for health service, support, and additional activities; and  
48  
49 239 service statistics.  
50  
51  
52

53 240  
54  
55  
56  
57  
58  
59  
60

241 The next step was data validation and set activity standards. Primary data validation was done  
 242 through phone calls made to the services providers, and health facility statisticians. Secondly, these  
 243 were shared with the SC and TT members. Finally, interviews were conducted with the EWG  
 244 members to finalize the activity standards (Table 1).

246 **Table 1 Number of interviewees representing EWG of staff categories**

| EWG representing staff category                | Number |
|------------------------------------------------|--------|
| Physicians: MO, EMO, RMO                       | 2      |
| Nurses: Nursing Supervisor, Senior Staff Nurse | 7      |
| Total                                          | 9      |

247  
 248 We presented the time-motion findings to the EWG members and requested them to be as realistic  
 249 as possible in suggesting activity standards. We also requested them to account for the variability  
 250 of patient load due to factors such as seasonality, timing of day, facility catchment population, etc.  
 251 Finally, through multiple meetings, debates and deliberations, the activity standard was finalized,  
 252 taking into account the information from the IDIs and KIIs, and inputs from the EWG members  
 253 (Table 2).

254  
 255 **Table 2 Service standard for Physicians and Nurses in UpHCs, Bangladesh, 2017**

| Activities | Service standard |       | Unit |
|------------|------------------|-------|------|
|            | Physician        | Nurse |      |

|                                                                          |                |                |                   |
|--------------------------------------------------------------------------|----------------|----------------|-------------------|
| Obstetrical Service (Caesarean Section) <sup>a</sup>                     | 90             | 90             | min/patient       |
| Obstetrical Service (Normal Delivery)                                    | 60             | 120            | min/patient       |
| Newborn Management                                                       | 15             | 15             | min/inpatient day |
| Emergency Service                                                        | 15             | Not applicable | min/patient       |
| IMCI/ Nutritional Service                                                | 15             | 15             | min/patient       |
| OPD Service (including NCD management)                                   | 10             | Not applicable | min/patient       |
| First ANC                                                                | 20             | 20             | min/patient       |
| Follow-up ANC                                                            | 10             | 10             | min/patient       |
| PNC                                                                      | 15             | 15             | min/patient       |
| Indoor Services (Round, including minor bedside procedures) <sup>b</sup> | 25.65          | 34             | min/inpatient day |
| Bedside patient care                                                     | Not applicable | 17             | min/inpatient day |
| Patient admission and discharge                                          | Not applicable | 20             | min/inpatient day |
| Death certification and associated arrangements                          | 20             | 30             | min/patient       |

256 **Note:** <sup>a</sup>For Nurses: Assist Obstetrical Service (Caesarean Section); <sup>b</sup>For Nurses: Indoor Services  
 257 (Round with Physician)

258 # IMCI: Integrated Management of Childhood Illness; OPD: Out Patient Department; NCD: Non-  
 259 communicable Diseases; ANC: Antenatal Care; PNC: Postnatal Care.

260

261 In order to ensure the quality of data, the Principal Expert (lead author of this article), Co-experts  
262 (two co-experts – one was leading data collection and the other was leading data quality check and  
263 reporting), WHO team consisting of national and international technical experts, and officials from  
264 the Human Resource Branch of Ministry of Health and Family Welfare (MoHFW) conducted field  
265 visits to each study District and the health facilities therein. During the time-motion data collection  
266 period, the Co-experts monitored the data and their geographic location in real-time. They also  
267 regularly checked the consistency of the data. Our field based data collection team saved contact  
268 information of all the respondents; so, in case of any confusion or need for clarification, the Co-  
269 experts called the respondents over phone.

270

### 271 **Data management and analysis**

272 The first analytic step was to estimate available working time of the staffs. This is the time a health  
273 worker has available in one year to do his or her work, taking into account authorized and  
274 unauthorized absences<sup>15</sup>. For all categories of staff, a uniform number of weeks per year (52  
275 weeks), working days in one week (six days), possible working days in one year ( $52 * 6 = 312$   
276 days) were estimated. Next, absent days, such as public holidays (20 days), earned leave (average  
277 for each staff category, based on Health Management Information System data), and casual leave  
278 (20 days) were deducted to obtain the annual working time in days. Multiplying this with daily  
279 working hours (six hours per day), we obtained annual working time in hours.

280

1  
2  
3 281 Workload components were defined through the inputs from the key informants; activity standards  
4  
5 282 were also set through the interviews with the EWG members. An activity standard is the time  
6  
7 283 necessary for a well-trained, skilled and motivated worker to perform an activity to professional  
8  
9 284 standards in the local circumstances<sup>15</sup>. Both service standards (for health service activities),  
10  
11 285 category allowance standards (for support activities), and individual allowance standards (for  
12  
13 286 additional activities) were determined in the same way.

14  
15  
16  
17 287 The next analytic step was to establish standard workload, which was done by dividing the annual  
18  
19 288 working time by unit time of health service activities. A standard workload is the amount of work  
20  
21 289 within a health services workload component that one health service provider can do in a year  
22  
23 290 hypothetically<sup>15</sup>. Then category allowance factor and individual allowance factors were calculated  
24  
25 291 using the following formula, respectively:

26  
27  
28 292  $\text{Category allowance factor} = 1 / \{1 - (\text{Total category allowance standard} / 100)\}$

29  
30  
31 293  $\text{Individual allowance factor} = \text{Total individual allowance standard} / \text{Available working time in}$   
32  
33 294  $\text{hours}$

34  
35 295

36  
37  
38 296 Next, exact number of required staff was calculated by the following formula:

39  
40 297  $\text{Total required number of staff} = (\text{Staff needed for health service activity} * \text{Category allowance}$   
41  
42 298  $\text{factor}) + \text{Individual allowance factor}$

43  
44  
45 299 The fractional results were rounded up or down, following the guideline provided in the WISN  
46  
47 300 manual<sup>15</sup>:

- 48  
49 301 • 1.0 – 1.1 is rounded down to 1 and >1.1 – 1.9 is rounded up to 2  
50  
51 302 • 2.0 – 2.2 is rounded down to 2 and >2.2 – 2.9 is rounded up to 3  
52  
53  
54 303 • 3.0 – 3.3 is rounded down to 3 and >3.3 – 3.9 is rounded up to 4  
55  
56  
57  
58  
59  
60

- 304 • 4.0 – 4.4 is rounded down to 4 and >4.4 – 4.9 is rounded up to 5
- 305 • 5.0 – 5.5 is rounded down to 5 and >5.5 – 5.9 is rounded up to 6

307 Finally, based on the existing number of staff in the respective health facilities, we calculated both  
308 the difference (current number of staff – required number of staff by WISN), and the ratio (current  
309 number of staff / required number of staff by WISN). The WISN difference indicates whether the  
310 health facilities are relatively understaffed (i.e., when the WISN difference is negative),  
311 overstaffed (i.e., when the WISN difference is positive), or balanced (i.e., when the WISN  
312 difference is zero). The WISN Ratio indicates whether the staffs are experiencing high workload  
313 (i.e., when the WISN Ratio is lower than one), low workload (i.e., when the WISN Ratio is higher  
314 than one), or normal workload (i.e., when the WISN Ratio is equal to one). For this calculation,  
315 we used the de-facto number of current staff, i.e., the number of staff that we actually found  
316 working in the health facilities during our data collection period; not the number shown in the  
317 office records or statistics.

### 319 **Ethical considerations**

320 Ethical approval for this study was obtained from the Ethical Review Committee (ERC) of BRAC  
321 James P Grant School of Public Health, BRAC University. All ethical principles were strictly  
322 adhered to. We obtained a support letter from the Ministry of Health and Family Welfare and also  
323 obtained written informed consent form from each person we engaged in data collection. Identity  
324 of respondents was kept confidential.



## 326 Results

### 327 General WISN findings across levels

328 For descriptive purposes, we have categorized the workload pressure as Extremely High (WISN  
 329 Ratio between 0.10 and 0.29), Very High (WISN Ratio between 0.30 and 0.49), High (WISN Ratio  
 330 between 0.50 and 0.69), Moderately High (WISN Ratio between 0.70 and 0.89), Normal (WISN  
 331 Ratio between 0.90 and 1.19), and Low (WISN Ratio greater than or equal to 1.20). Based on this  
 332 categorization, at an aggregate level (i.e., considering the average required number and WISN  
 333 Ratio across the same types of health facilities), physicians are found to have a Very High (WISN  
 334 Ratio 0.43) and nurses High (WISN Ratio 0.69) workload pressure. To cope with the workload,  
 335 on an average 11 physicians (on average 4.50 were available during data collection) and 19 nurses  
 336 (On average 12.75 were available during data collection) are needed in each UpHC (Table 3). This  
 337 means, there was an average deficit of six members in each staff categories.

338  
 339 **Table 3 Analysis of WISN results at aggregate level (average required number and WISN**  
 340 **Ratio across same types of health facilities)**

| Staff category | Required staff to cope with the demand | Average number of existing staff | Deficit of staff | Average WISN Ratio | Workload pressure |
|----------------|----------------------------------------|----------------------------------|------------------|--------------------|-------------------|
| Physician      | 10.59                                  | 4.50                             | 6.09             | 0.43               | Very high         |
| Nurse          | 18.86                                  | 12.75                            | 6.11             | 0.69               | High              |

341

342 Tabulating the total percentage of time spent on all support activities (i.e., category allowance  
 343 standards) by different staff categories, we found that, 50% of nurses' time are occupied with  
 344 support activities (Table 4).

346 **Table 4 Comparison of Support Activities across staff categories**

| Staff category | Total % of support activities |
|----------------|-------------------------------|
| Physician      | 24%                           |
| Nurse          | 50%                           |

347

348 **WISN results disaggregated by UpHCs**

349 The required number of staff ranges from eight to 12 among Physicians, and 16 to 23 among  
 350 Nurses. Highest shortage is observed in Nurses of Sreemangal UpHC (-8.46), followed by  
 351 Physicians of Kulaura UpHC (-8.28). Workload pressure is the highest among Physicians of  
 352 Kotchandpur UpHC (WISN Ratio 0.28) and lowest among Nurses of Shailkupa (WISN Ratio 0.87)  
 353 (Table 5).

355 **Table 5 Analysis of WISN results of Upazila level health staff**

| Health facility                  | Current number of staff | Required number, based on WISN | Shortage or excess | WISN Ratio | Workload pressure |
|----------------------------------|-------------------------|--------------------------------|--------------------|------------|-------------------|
| <b>Staff category: Physician</b> |                         |                                |                    |            |                   |

|                              |    |       |       |      |                    |
|------------------------------|----|-------|-------|------|--------------------|
| Shailkupa UpHC               | 4  | 8.14  | -4.14 | 0.49 | Very High          |
| Kotchandpur<br>UpHC          | 3  | 10.71 | -7.71 | 0.28 | Extremely<br>High  |
| Kulaura UpHC                 | 4  | 12.28 | -8.28 | 0.33 | Very High          |
| Sreemangal<br>UpHC           | 7  | 11.23 | -4.23 | 0.62 | High               |
| <b>Staff category: Nurse</b> |    |       |       |      |                    |
| Shailkupa UpHC               | 14 | 16.08 | -2.08 | 0.87 | Moderately<br>High |
| Kotchandpur<br>UpHC          | 15 | 22.80 | -7.8  | 0.66 | High               |
| Kulaura UpHC                 | 10 | 16.08 | -6.08 | 0.62 | High               |
| Sreemangal<br>UpHC           | 12 | 20.46 | -8.46 | 0.59 | High               |

356

### 357 **Change of workload if vacancies are filled**

358 If the vacant posts are filled, understandably, the workload is reduced. In most of the cases,  
 359 sanctioned number of Physicians and Nurses is more than what is actually needed to tackle the  
 360 workload. However, only filling up the vacant posts are not enough in case of some of the staff  
 361 categories, such as the Nurses at Kotchandpur and Physicians at Sreemangal (Table 6).

362

363 **Table 6 Change of workload if vacancies in Physician and Nursing posts are filled**

| Health facility  | Staff category | Current number of staff | Required number, based on WISN | WISN Ratio | Sanctioned number of staff | WISN Ratio as per sanctioned number of staff |
|------------------|----------------|-------------------------|--------------------------------|------------|----------------------------|----------------------------------------------|
| Shailkupa UpHC   | Physician      | 4                       | 8.14                           | 0.49       | 10                         | 1.25                                         |
|                  | Nurse          | 14                      | 16.08                          | 0.87       | 21                         | 1.31                                         |
| Kotchandpur UpHC | Physician      | 3                       | 10.71                          | 0.28       | 20                         | 1.82                                         |
|                  | Nurse          | 15                      | 22.80                          | 0.66       | 20                         | 0.87                                         |
| Kulaura UpHC     | Physician      | 4                       | 12.28                          | 0.33       | 20                         | 1.67                                         |
|                  | Nurse          | 10                      | 16.08                          | 0.62       | 26                         | 1.62                                         |
| Sreemangal UpHC  | Physician      | 7                       | 11.23                          | 0.62       | 10                         | 0.91                                         |
|                  | Nurse          | 12                      | 20.46                          | 0.59       | 22                         | 1.10                                         |

364

365 **Discussion and recommendations**366 **Discussion**

367 Findings from this WISN study clearly indicates that the public-sector healthcare providers in  
 368 Bangladesh are suffering from a very high workload pressure. Nurses are predominantly occupied  
 369 with support activities rather than actual nursing care. There is unequal workload across UpHCs,  
 370 indicating potential for workforce re-distribution. The unequal workload mainly stems from

1  
2  
3 371 differing patient load, due to geographic location, number of catchment population, and  
4  
5 372 epidemiological characteristics, at different UpHCs. Inappropriate number of sanctioned posts  
6  
7  
8 373 indicate the necessity of WISN-based workforce planning.  
9

10 374  
11  
12 375 High workload pressure may arise from absolute or relative shortage of health workforce. Absolute  
13  
14 376 shortage appears when there is inadequate production of a particular staff category while relative  
15  
16 377 shortage appears when health workforce is not distributed evenly between the urban and rural areas  
17  
18 378 throughout the country for various reasons. For example, absolute shortage in HRH production is  
19  
20 379 revealed by the fact that there are only 4.90 registered physicians and 2.90 registered nurses per  
21  
22 380 10,000 populations<sup>17</sup>, rendering the country to be one of the 57 critical workforce shortage  
23  
24 381 countries in the world<sup>6</sup>. On top of this absolute shortage, Bangladesh also suffers from relative  
25  
26 382 shortage, as evidenced from the fact that physician to population ratio in urban areas is 1:1,500,  
27  
28 383 but in rural areas it is 1:15,000<sup>20</sup>. Workload pressure has some serious consequences as well,  
29  
30 384 namely, fatigue and burnout of service providers, lack of motivation, and compromised quality of  
31  
32 385 care<sup>21</sup>. High workload is, however, not unique to Bangladesh. WISN studies in Low- and Middle-  
33  
34 386 Income Countries (LMICs) like Namibia<sup>22</sup>, Uganda<sup>23</sup>, Kenya<sup>24</sup>, Burkina Faso<sup>25</sup>, and Iran<sup>26</sup> also  
35  
36 387 identified high workload pressure among their HRH.  
37  
38  
39  
40  
41  
42 388  
43  
44

45 389 It is expected that the nurses would spend most of their service times beside the patients, providing  
46  
47 390 nursing care. Unfortunately, this is not the case in Bangladesh as well as in some other comparable  
48  
49 391 settings. A qualitative study in Bangladesh showed, nurses' maximum time is spent on  
50  
51 392 administrative and paperwork tasks<sup>27</sup>. Excessive support activities of nurses is reported in studies  
52  
53 393 conducted in Iran<sup>26</sup>, and Uganda<sup>23</sup> as well. A recent WISN study conducted in Iran showed, nurses  
54  
55  
56  
57  
58  
59  
60

1  
2  
3 394 are overburdened; and support activities account for 31% of their workload<sup>26</sup>. Nurses' excessive  
4  
5 395 engagement in paperwork or other support activities may result from deficient human resource  
6  
7  
8 396 planning and management.  
9

10 397  
11  
12 398 Despite the fact that most of the staff are already overworked, staffs in some health facilities may  
13  
14 399 be more so, compared to a neighboring one. Presence of different number of staffs causes  
15  
16 400 fluctuation in the amount of workload at different health facilities. In places where workload of a  
17  
18 401 staff category is 'Extremely High', some supports from nearby health facilities with lower  
19  
20 402 workload should be sought. Or, in places where workload of a staff category is 'Normal' or 'Low',  
21  
22 403 some support may be transferred to health facilities with higher workload. For example, in  
23  
24 404 Sreemangal UpHC, there are seven physicians, with a High workload pressure. However,  
25  
26 405 workload pressure in nearby Kulaura UpHC is Very High, with only four physicians (Table 5). At  
27  
28 406 least one physician from Sreemangal can be reallocated to Kulaura to tackle the high workload.  
29  
30  
31 407 Similar action may be taken regarding the Nurses by transferring some from Shailkupa  
32  
33 408 (Moderately High workload) to Kotchandpur (High workload). This is just an example how WISN  
34  
35 409 can help in decision-making regarding allocation of human resources. Similar situation was  
36  
37 410 identified in Namibia, where researchers suggested redistribution of health workers from one area  
38  
39 411 to the other<sup>22</sup>.  
40  
41  
42  
43  
44  
45 412

46  
47 413 We found that many posts remained vacant in different health facilities. Some staffs were not  
48  
49 414 present at their service locations for various reasons, such as training, deputation to another health  
50  
51 415 facility, etc. Even if the existing posts are filled-up, a large portion of the workload would be  
52  
53  
54 416 curbed. For example, according to the Standard Setup document of the Ministry of Public  
55  
56  
57  
58  
59  
60

1  
2  
3 417 Administration, 18 physician posts (10 Junior Consultants, one Residential Medical Officer, seven  
4  
5 418 Assistant Surgeons) have been proposed for a 50 bed hospital<sup>28</sup>. We have found 4.5 Physicians on  
6  
7 419 an average in each UpHC. The average required number is 11 (Table 3). Our proposition is that,  
8  
9 420 even if it is not possible to reach the ideal workforce setup for a health facility, filling-up at least  
10  
11 421 the vacant positions, and ensuring regular presence of all staffs would reduce the workload.  
12  
13 422 Supportive supervision and monitoring of the staff is essential to ensure the presence of posted  
14  
15 423 staff. Researchers in Namibia came up with the similar finding and proposed a similar solution for  
16  
17 424 the problem<sup>22</sup>. WISN was used over standard staffing schedule in HIV Clinics in Kenya as well to  
18  
19 425 resolve a similar crisis<sup>24</sup>.  
20  
21  
22  
23  
24 426

## 27 427 **Recommendations**

28  
29 428 Based on the findings and its in-depth analysis, we propose few short-term and long-term  
30  
31 429 recommendations. The short-term recommendations require administrative or management  
32  
33 430 decisions, relatively easier to implement and tackle the immediate crisis. On the other hand, the  
34  
35 431 long-term recommendations demand radical policy amendments following careful examination.  
36  
37  
38  
39 432

40  
41 433 Short-term recommendations include: reallocation of staff from low workload areas to high  
42  
43 434 workload areas, fill-up existing vacant positions and strengthen supervision and monitoring.  
44  
45 435 Nurses are the most needed staff, the most overloaded, and are short in supply. On top of all these,  
46  
47 436 they are burdened with support activities. If some of their support and additional activities can be  
48  
49 437 shifted to other staff, nurses can devote their time better in nursing care.  
50  
51  
52  
53 438

1  
2  
3 439 The study yields some long-term recommendations as well, for the policy-makers. For example,  
4  
5 440 in order to increase the availability of workforce, especially Nurses, and decrease their workload,  
6  
7 441 their number needs to increase. Hence, long term policy response is needed to increase the intake  
8  
9 442 of nursing students, train them with quality education, and deploy them in larger numbers in a  
10  
11 443 secure and gender-friendly work environment. In the same vein, incentives should be given to  
12  
13 444 increase the number of nurses in both public and private sector educational institutions.  
14  
15 445 Regulations should be developed and implemented so that medical colleges can be established  
16  
17 446 only when a nursing school is established alongside. Otherwise, the skill-mix imbalance between  
18  
19 447 physicians and nurses would jeopardize the quality of care. Quality and quantity of physicians  
20  
21 448 should also increase.

22  
23  
24  
25  
26 449 Secondly, since the Nurses are found to be predominantly engaged in support activities at the  
27  
28 450 expense of actual patient care, a separate staff category for administrative/ support activities is  
29  
30 451 greatly warranted. This will free up the valuable yet scarce clinical time of the service providers.

31  
32  
33 452 Thirdly, instead of the existing approach of deploying a fixed number of workforce at all health  
34  
35 453 facilities, a flexible recruitment and HRH planning is needed, based on patient load and disease  
36  
37 454 burden. This can be supported by determination of optimal requirements of HRH under given  
38  
39 455 limited resources or constraints in those health facilities<sup>29-32</sup> by using the WHO methodology on  
40  
41 456 workload indicators of staffing need. It is important to recognize that, decisions in health sector  
42  
43 457 are very much contingent on the local context, especially the patient load, demographic drivers  
44  
45 458 (e.g., age structure of the population, gender ratio, etc.), and epidemiologic profile. Therefore, the  
46  
47 459 government should adopt flexible health workforce planning and recruitment policy in place to  
48  
49 460 keep up with the local patient load and disease burden. The culture of bottom-up decision-making  
50  
51 461 should be adopted eventually.  
52  
53  
54  
55  
56  
57  
58  
59  
60



1  
2  
3 462  
4  
5  
6

## 7 463 **Strengths and limitations**

8  
9 464 This study had a number of strengths. First, we conducted time-motion study, which helped the  
10  
11 465 research team gain a better understanding of the service context of the staffs. Secondly, when the  
12  
13 466 key informants or experts suggested an unrealistic activity standard, we presented them the time-  
14  
15 467 motion findings and helped them suggest a more context sensitive standards. Thirdly, the research  
16  
17 468 team used both qualitative and quantitative methods for primary data collection, which  
18  
19 469 complement each other for bringing data accuracy. Fourthly, WHO technical officers, who had  
20  
21 470 expertise in WISN application in other countries, and the Ministry of Health officials were directly  
22  
23 471 involved in the field level data quality checks.  
24  
25  
26

27 472  
28  
29

30 473 However, despite careful planning and painstaking implementation of the research, we faced some  
31  
32 474 challenges during different stages of the WISN process. First, some service statistics data, which  
33  
34 475 were essential for establishing standard workloads, were not readily available due to poor record  
35  
36 476 keeping systems at some health facilities. Secondly, the research did not take into account the  
37  
38 477 patients' opinion or stakeholders' stance. Notwithstanding the fact that these perspectives are  
39  
40 478 gaining momentum in health workforce decision-making, we could not take advantage of them in  
41  
42 479 the interest of adhering to the highly structured nature of the WISN methodology. Thirdly, the  
43  
44 480 official number of existing staffs often did not match with the number of staffs we observed  
45  
46 481 providing services.  
47  
48  
49

50 482  
51  
52

## 53 483 **Conclusions**

54  
55  
56  
57  
58  
59  
60

1  
2  
3 484 Human resource management is a big challenge, especially in a resource-poor setting like  
4  
5 485 Bangladesh. With a vision of becoming a middle-income country by 2021, Bangladesh needs to  
6  
7 486 strive for optimizing its existing resources, including human resources. This type of study can aid  
8  
9 487 the decision-making in this direction, using the WISN as a planning tool for the managers.  
10  
11 488 Implementation research is needed regarding how this workload-based staffing decisions can be  
12  
13 489 integrated into the health systems in the most effective way. We expect that, these types of studies  
14  
15 490 would pave the way for evidence-based HRH decision-making in the context of health system of  
16  
17 491 Bangladesh.  
18  
19  
20  
21  
22 492

### 23 24 493 **List of abbreviations**

25  
26  
27 494 ANC: Antenatal Care;  
28  
29 495 EMO: Emergency Medical Officer;  
30  
31 496 ERC: Ethical Review Committee;  
32  
33 497 ESP: Essential Services Package;  
34  
35 498 EWG: Expert Working Groups;  
36  
37 499 FDCs: Field Data Collectors;  
38  
39 500 FSs: Field Supervisors;  
40  
41 501 GoB: Government of Bangladesh;  
42  
43 502 HRH: Human Resources for Health;  
44  
45 503 IDI: In-depth Interviews;  
46  
47 504 IMCI: Integrated Management of Childhood Illness;  
48  
49 505 KII: Key Informant Interviews;  
50  
51 506 LMICs: Low- and Middle-Income Countries;  
52  
53  
54  
55  
56  
57  
58  
59  
60

1  
2  
3 507 MO: Medical Officer;  
4  
5 508 MoHFW: Ministry of Health and Family Welfare;  
6  
7 509 NCD: Non-communicable Diseases;  
8  
9  
10 510 OPD: Out Patient Department;  
11  
12 511 PNC: Postnatal Care;  
13  
14 512 RMO: Residential Medical Officer;  
15  
16 513 SC: Steering Committee;  
17  
18 514 TT: Technical Taskforce;  
19  
20 515 UHC: Universal Health Coverage;  
21  
22 516 UpHCs: Upazila Health Complexes;  
23  
24 517 WISN: Workload Indicators of Staffing Need  
25  
26  
27  
28  
29  
30  
31

## 32 **Declarations**

### 33 ***Consent for publication***

34  
35  
36 520  
37  
38  
39 521 During the data collection process, while the ethical consents were obtained from the respondents,  
40  
41 522 they were informed that their data might be used for publication in future. They were also informed  
42  
43 523 that their identity will remain anonymous. Institutional consents for publication were obtained as  
44  
45  
46 524 well.  
47

### 48 ***Availability of data and materials***

49  
50  
51 526 All research data have been submitted to the World Health Organization Country Office for  
52  
53 527 Bangladesh, as per the agreement with the research organization, BRAC James P Grant School of  
54  
55  
56 528 Public Health, BRAC University. This manuscript only used the data pertaining to the Physicians  
57

1  
2  
3 529 and Nurses working at the two study Upazila (sub-district) Health Complexes. Unpublished data  
4  
5 530 include: Consultants, General Physicians, and Nurses at the District Hospital level; Physicians,  
6  
7 531 and Family Welfare Visitors at Maternal and Child Welfare Center level; Sub-Assistant  
8  
9 532 Community Medical Officers at the Upazila Health Complex level; Sub-Assistant Community  
10  
11 533 Medical Officers at Union Sub-Centers level, Sub-Assistant Community Medical Officers, and  
12  
13 534 Family Welfare Visitors at Union Health and Family Welfare Centers level; and Community  
14  
15 535 Health Care Providers, and Family Welfare Assistants at the Community Clinic/ Outreach level.  
16  
17 536 Data may be obtained from the World Health Organization Country Office for Bangladesh upon  
18  
19 537 reasonable request (Focal Point: Mr. Md Nuruzzaman- nuruzzamanm@who.int).  
20  
21  
22  
23  
24 538

### 27 539 *Competing interests*

30 540 The authors declared that they do not have any competing interests.  
31  
32  
33 541

### 35 542 *Funding*

38 543 This study was funded by WHO Country Office, Bangladesh and conducted by a group of  
39  
40 544 researchers at BRAC James P Grant School of Public Health, BRAC University.  
41  
42  
43 545

### 46 546 *Authors' contributions*

48 547 TJ conceived and designed the study. TJ and SNBKT carried out the data analyses and drafted the  
49  
50 548 manuscript. MN, SA, VOC, and TZ thoroughly reviewed the manuscript and contributed  
51  
52 549 substantially with necessary revision. TJ and SNBKT again reviewed the manuscript and prepared  
53  
54 550 for final submission. All authors approved the final manuscript.  
55  
56  
57  
58  
59  
60

1  
2  
3  
4 5515  
6  
7 552 ***Acknowledgements***

8  
9 553 BRAC James P Grant School of Public Health, BRAC University acknowledges with gratitude to  
10  
11 554 WHO Country Office, Bangladesh for its contribution in this research effort and MoHFW for  
12  
13  
14 555 supporting the research team throughout the study period. We are also thankful to the study  
15  
16 556 participants who consented to participate in the study. We are indebted to Professor. Dr. Sayed  
17  
18 557 Masud Ahmed, who served as the Advisor to the study project, and provided valuable technical  
19  
20  
21 558 inputs at different stages of the project. Finally, we would like to extend our sincere gratitude to  
22  
23 559 the Field Supervisors and Data Collectors for their contribution throughout the qualitative and  
24  
25 560 quantitative data collection.

26  
27  
28 56129  
30 562 **Patient and Public Involvement statement:** No patient involved31  
32  
33 56334  
35 564 **Reference**36  
37  
38 565 1 International Labor Organization. Global Extension of Social Security. Geneva: 2013.39  
40 566 2 World Health Organization. *Global Strategy on Human Resources for Health: Workforce*  
41  
42 567 *2030*. Geneva: : World Health Organization 2016.43  
44  
45 568 <http://apps.who.int/iris/bitstream/10665/250368/1/9789241511131-eng.pdf?ua=1>46  
47 569 3 WHO South East Asia Regional Office. *Decade for health workforce strengthening in the*  
48  
49 570 *South-East Asia Region 2015–2024; Second review of progress, 2018*. Delhi PP - Delhi: :50  
51  
52 571 World Health Organization. Regional Office for South-East Asia 2018.53  
54 572 <https://apps.who.int/iris/handle/10665/274310>  
55  
56  
57

- 1  
2  
3 573 4 Van Lerberghe W, Conceição C, Van Damme W, *et al.* When staff is underpaid: Dealing  
4  
5  
6 574 with the individual coping strategies of health personnel. *Bull World Health Organ*  
7  
8 575 2002;**80**:581–4. doi:10.1590/S0042-96862002000700011  
9
- 10 576 5 Rowe AK, DeSavigny D, Lanata CF, *et al.* How can we achieve and maintain high-quality  
11  
12 577 performance of health workers in low-resource settings? *Lancet* 2005;**366**.  
13  
14 578 doi:10.1016/S0140-6736(05)67028-6  
15
- 16  
17 579 6 World Health Organization. *The world health report 2006: Working together for health*.  
18  
19 580 Geneva: : World Health Organization 2006.  
20
- 21  
22 581 7 Henderson LN, Tulloch J. Incentives for retaining and motivating health workers in  
23  
24 582 Pacific and Asian countries. *Hum Resour Health* 2008;**6**:18. doi:10.1186/1478-4491-6-18  
25
- 26 583 8 Ahmed SM, Evans TG, Standing H, *et al.* Harnessing pluralism for better health in  
27  
28 584 Bangladesh. *Lancet* 2013;**382**:1746–55. doi:10.1016/S0140-6736(13)62147-9  
29
- 30  
31 585 9 Ahmed SM, Alam BB, Anwar I, *et al.* *Bangladesh Health System Review*. Dhaka: : World  
32  
33 586 Health Organization 2015.  
34
- 35  
36 587 10 Cometto G, Witter S. Tackling health workforce challenges to universal health coverage:  
37  
38 588 setting targets and measuring progress. *Bull World Health Organ* 2013;**91**:881–5.  
39  
40 589 doi:10.2471/BLT.13.118810  
41
- 42  
43 590 11 Government of Bangladesh. *Bangladesh Health Workforce Strategy 2015*. Dhaka: 2015.  
44
- 45 591 12 Darkwa EK, Newman MS, Kawkab M, *et al.* A qualitative study of factors influencing  
46  
47 592 retention of doctors and nurses at rural healthcare facilities in Bangladesh. *BMC Health*  
48  
49 593 *Serv Res* 2015;**15**:1–12. doi:10.1186/s12913-015-1012-z  
50
- 51  
52 594 13 Rawal LB, Joarder T, Islam SMS, *et al.* Developing effective policy strategies to retain  
53  
54 595 health workers in rural Bangladesh: a policy analysis. *Hum Resour Health* 2015;**13**.  
55  
56  
57  
58  
59  
60

- 1  
2  
3 596 doi:10.1186/s12960-015-0030-6  
4  
5  
6 597 14 Reynolds JD, Costello T, Edwards MT. The Study of Workload in Child Protective and  
7  
8 598 Child Welfare Services. *Prot Child A Prof Publ Am Hum* 2008;**23**:3–  
9  
10 599 5.[https://www.researchgate.net/profile/Robin\\_Perry3/publication/237430886\\_A\\_Critical\\_](https://www.researchgate.net/profile/Robin_Perry3/publication/237430886_A_Critical_Appraisal_of_What_Child_Welfare_Workers_Do_Findings_From_a_Task_Analysis_Study_in_Florida/links/54662f200cf25b85d17f5b5b.pdf#page=4)  
11  
12 600 [Appraisal\\_of\\_What\\_Child\\_Welfare\\_Workers\\_Do\\_Findings\\_From\\_a\\_Task\\_Analysis\\_Stu](https://www.researchgate.net/profile/Robin_Perry3/publication/237430886_A_Critical_Appraisal_of_What_Child_Welfare_Workers_Do_Findings_From_a_Task_Analysis_Study_in_Florida/links/54662f200cf25b85d17f5b5b.pdf#page=4)  
13  
14 601 [dy\\_in\\_Florida/links/54662f200cf25b85d17f5b5b.pdf#page=4](https://www.researchgate.net/profile/Robin_Perry3/publication/237430886_A_Critical_Appraisal_of_What_Child_Welfare_Workers_Do_Findings_From_a_Task_Analysis_Study_in_Florida/links/54662f200cf25b85d17f5b5b.pdf#page=4)  
15  
16  
17 602 15 World Health Organization. *Workload Indicators of Staffing Need: User's Manual*.  
18  
19 603 Geneva: : World Health Organization 2010.  
20  
21 604 16 Lopetegui M, Yen PY, Lai A, *et al*. Time motion studies in healthcare: What are we  
22  
23 605 talking about? *J Biomed Inform* 2014;**49**:292–9. doi:10.1016/j.jbi.2014.02.017  
24  
25  
26 606 17 Government of Bangladesh. Health Bulletin. Dhaka: 2016.  
27  
28 607 18 Ritchie J, Lewis J. *Qualitative Research Practice: A Guide for Social Science Students*  
29  
30 608 *and Researchers*. Thousand Oaks, California: : SAGE 2003.  
31  
32  
33 609 19 Government of Bangladesh. Bangladesh Essential Health Service Package (ESP). Dhaka:  
34  
35 610 2016.  
36  
37 611 20 Ahmed SM, Hossain MA, Chowdhury AMR, *et al*. The health workforce crisis in  
38  
39 612 Bangladesh: shortage, inappropriate skill-mix and inequitable distribution. *Hum Resour*  
40  
41 613 *Health* 2011;**9**:3. doi:10.1186/1478-4491-9-3  
42  
43  
44 614 21 Greenglass ER, Burke RJ, Moore KA. Reactions to Increased Workload: Effects on  
45  
46 615 Professional Efficacy of Nurses. *Appl Psychol* 2003;**52**:580–97. doi:10.1111/1464-  
47  
48 616 0597.00152  
49  
50  
51 617 22 McQuide PA, Kolehmainen-Aitken R-L, Forster N. Applying the workload indicators of  
52  
53 618 staffing need (WISN) method in Namibia: challenges and implications for human  
54  
55  
56  
57  
58  
59  
60

- 1  
2  
3 619 resources for health policy. *Hum Resour Health* 2013;**11**:64. doi:10.1186/1478-4491-11-  
4  
5 620 64  
6  
7  
8 621 23 Namaganda G, Oketcho V, Maniple E, *et al.* Making the transition to workload-based  
9  
10 622 staffing: using the Workload Indicators of Staffing Need method in Uganda. *Hum Resour*  
11  
12 623 *Health* 2015;**13**:89. doi:10.1186/s12960-015-0066-7  
13  
14  
15 624 24 Burmen B, Owuor N, Mitei P. An assessment of staffing needs at a HIV clinic in a  
16  
17 625 Western Kenya using the WHO workload indicators of staffing need WISN, 2011. *Hum*  
18  
19 626 *Resour Health* 2017;**15**:9. doi:10.1186/s12960-017-0186-3  
20  
21  
22 627 25 Ly A, Kouanda S, Ridde V. Nursing and midwife staffing needs in maternity wards in  
23  
24 628 Burkina Faso referral hospitals. *Hum Resour Health* 2014;**12**:S8. doi:10.1186/1478-4491-  
25  
26 629 12-S1-S8  
27  
28  
29 630 26 Nayebi BA, Mohebbifar R, Azimian J, *et al.* Estimating nursing staff requirement in an  
30  
31 631 emergency department of a general training hospital: Application of Workload Indicators  
32  
33 632 of Staffing Need (WISN). *Int J Healthc Manag* 2017;**0**:1–6.  
34  
35 633 doi:10.1080/20479700.2017.1390182  
36  
37  
38 634 27 Zaman S. Ladies without lamps: nurses in Bangladesh. *Qual Health Res* 2009;**19**:366–74.  
39  
40 635 doi:10.1177/1049732309331876  
41  
42  
43 636 28 Ministry of Public Administration. Standard setup by the government for human resources  
44  
45 637 in 10, 20, 31, 50, 100, 150, 200, 250, 500, 500 bed general hospitals at Union, Upazila,  
46  
47 638 District, and Division levels, under Ministry of Health and Family Welfare. 2008.  
48  
49  
50 639 29 Park CSY. Optimizing staffing, quality, and cost in home healthcare nursing: theory  
51  
52 640 synthesis. *J Adv Nurs* 2017;**73**:1838–47. doi:10.1111/jan.13284  
53  
54 641 30 Park CSY. Thinking “outside the box”. *J Adv Nurs* 2018;**74**:237–8. doi:10.1111/jan.13312  
55  
56  
57  
58  
59  
60



- 1  
2  
3 642 31 Park CSY, Park JY. Optimal Safe Staffing Standard for Right Workforce Planning. *J*  
4  
5 643 *Learn Teach Digit Age* 2019;4:42–4. doi:10.1111/jan.13284/full  
6  
7  
8 644 32 Saville CE, Griffiths P, Ball JE, *et al.* How many nurses do we need? A review and  
9  
10 645 discussion of operational research techniques applied to nurse staffing. *Int J Nurs Stud*  
11  
12 646 2019;97:7–13. doi:10.1016/j.ijnurstu.2019.04.015  
13  
14  
15 647

## 648 **Figure Legends**

649 Figure 1: The ways WISN can help in human resource decision-making

650 Figure 2: Methods applied in each WISN step

651 Figure 3: Map of Jhenaidah and Moulvibazar Districts with study Upazilas identified

652 Figure 4: Approach of integration of ESP components in defining workload components of  
653 health service activity

654

## Figure 1

Comparative analysis of WISN Ratio across different geographical areas (and health facilities therein)

- can help decision-making on recruitment of new staff and transfer of existing staff

Comparative analysis of WISN Ratio across comparable staff categories

- can help decision-making on allocating new functions on certain staff categories or removing their functions to other staff

Comparative analysis of current professional standards with the activity standards (developed for the WISN study)

- can help evaluating current professional performance and decision-making on additional staff requirement for performance improvement

Analysis of projected workload

- can help decision-making on future staffing of health facilities

Alternative scenario based WISN analysis (e.g., changing length of working week, changing leave days, changing training policies, etc.)

- can help examining the impact of different conditions on staff requirement

### Figure 1. The ways WISN can help in human resource decision-making

The ways WISN can help in human resource decision-making

**Figure 2****Figure 2 Methods applied in each WISN step**

Methods applied in each WISN step

1  
2  
3  
4  
5  
6  
7  
8  
9  
10  
11  
12  
13  
14  
15  
16  
17  
18  
19  
20  
21  
22  
23  
24  
25  
26  
27  
28  
29  
30  
31  
32  
33  
34  
35  
36  
37  
38  
39  
40  
41  
42  
43  
44  
45  
46  
47  
48  
49  
50  
51  
52  
53  
54  
55  
56  
57  
58  
59  
60

Figure 3



Figure 3 Map of Jhenaidah and Moulvibazar Districts with study Upazilas identified

Map of Jhenaidah and Moulvibazar Districts with study Upazilas identified

Figure 4



**Figure 4 Approach of integration of ESP components in defining workload components of health service activity**

Approach of integration of ESP components in defining workload components of health service activity
